# Supplementary material for: Radical cascade synthesis of azoles via tandem hydrogen atom transfer
Source: Royal Society of Chemistry journal article supplement (doi:10.1039/c9sc06239d), 2020-01-01

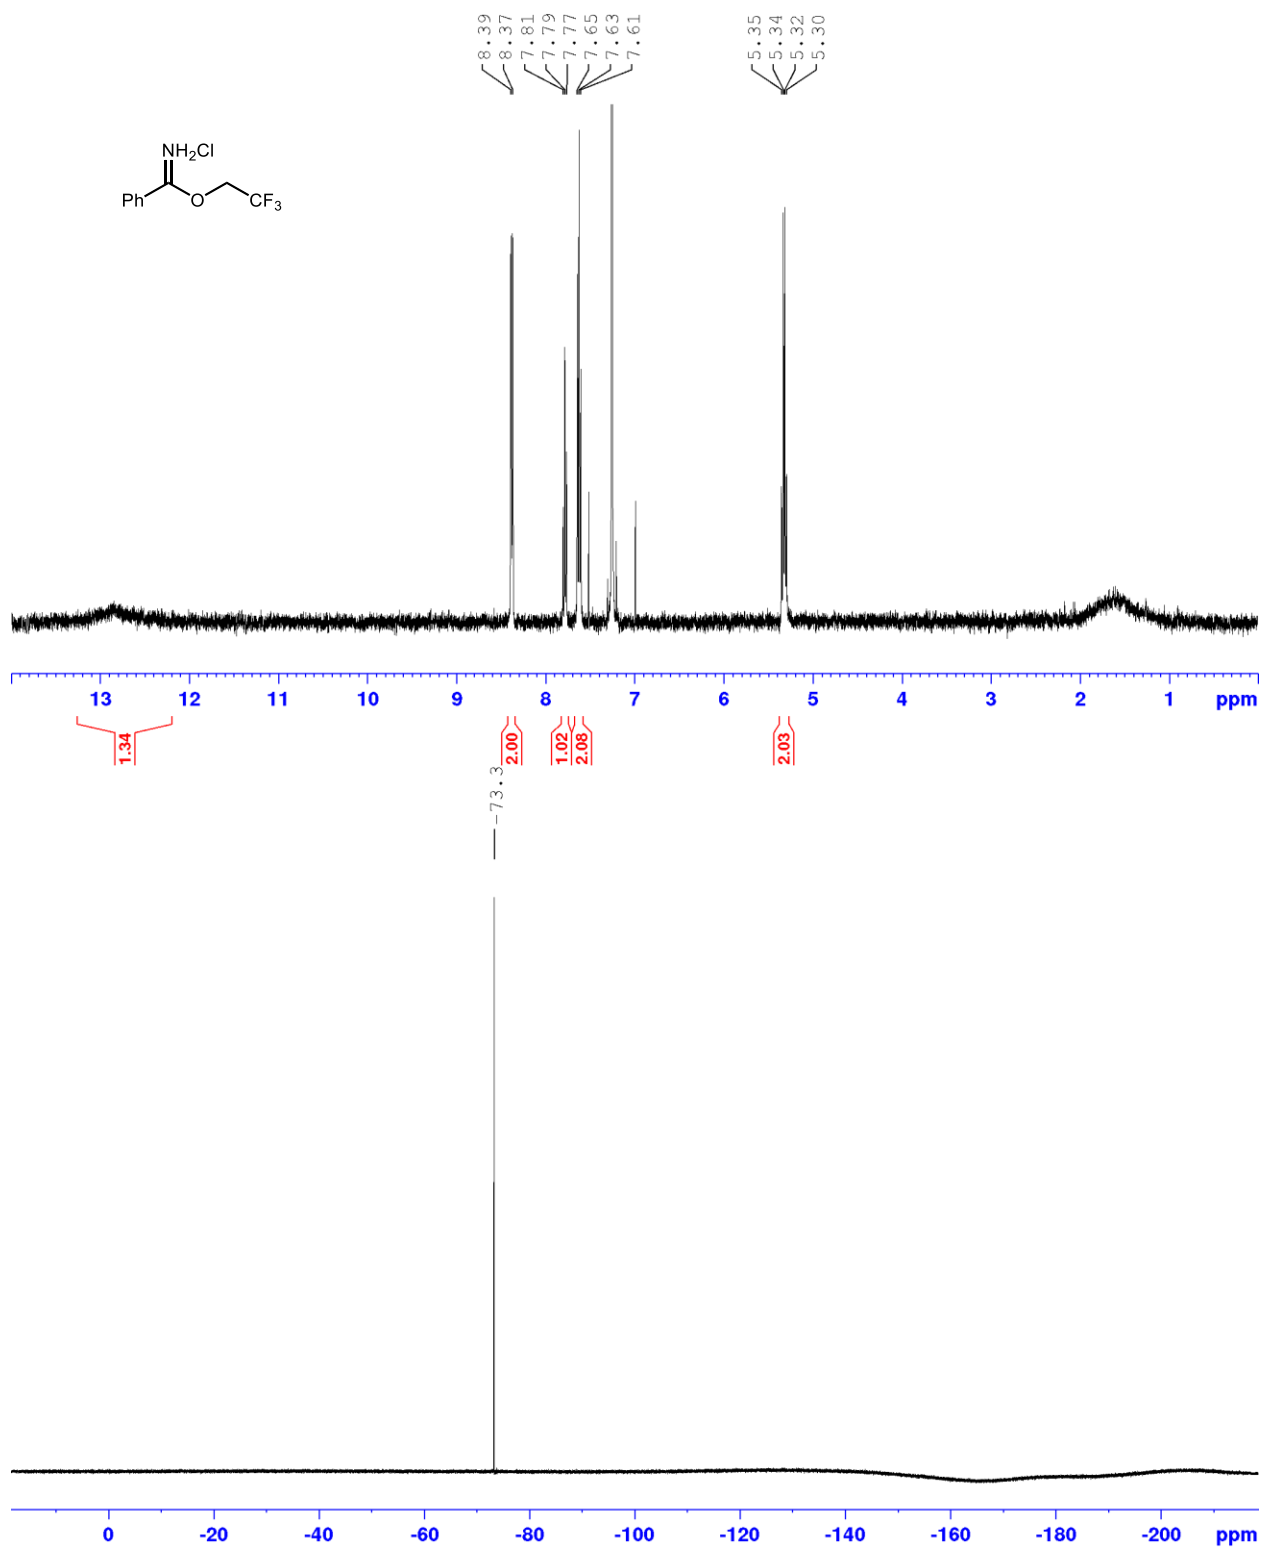

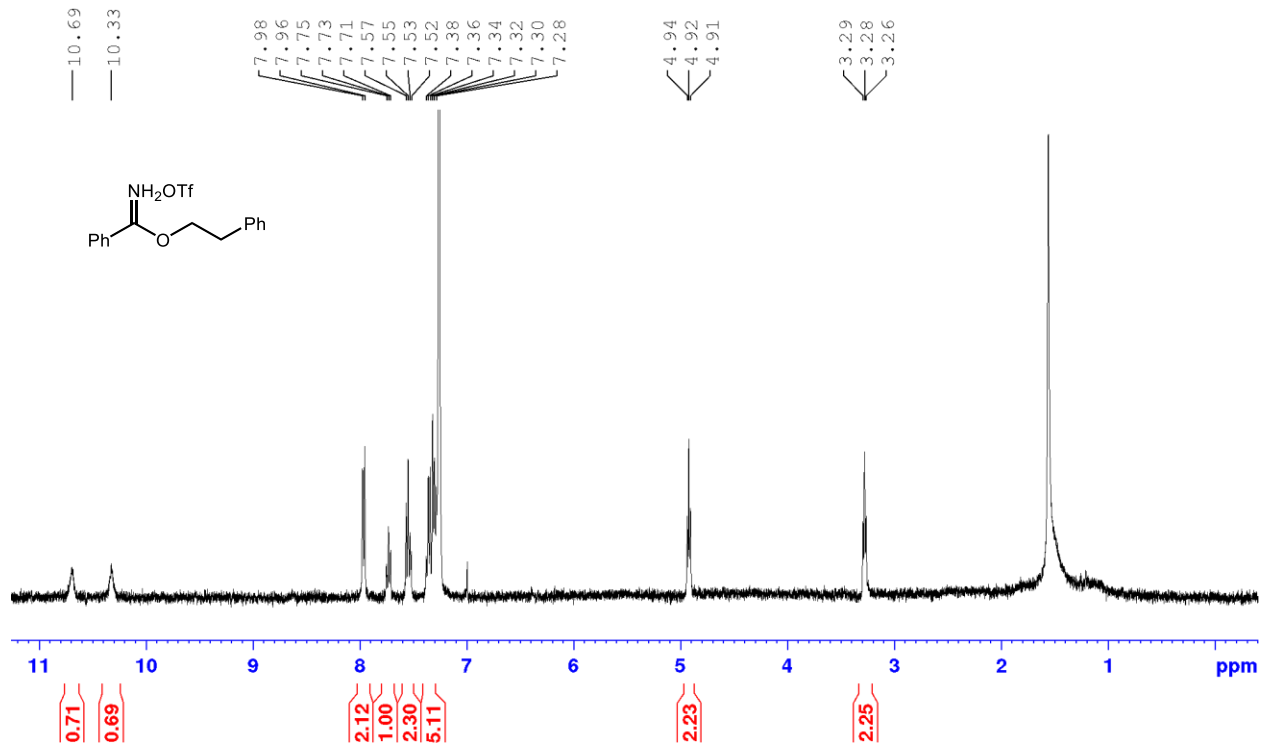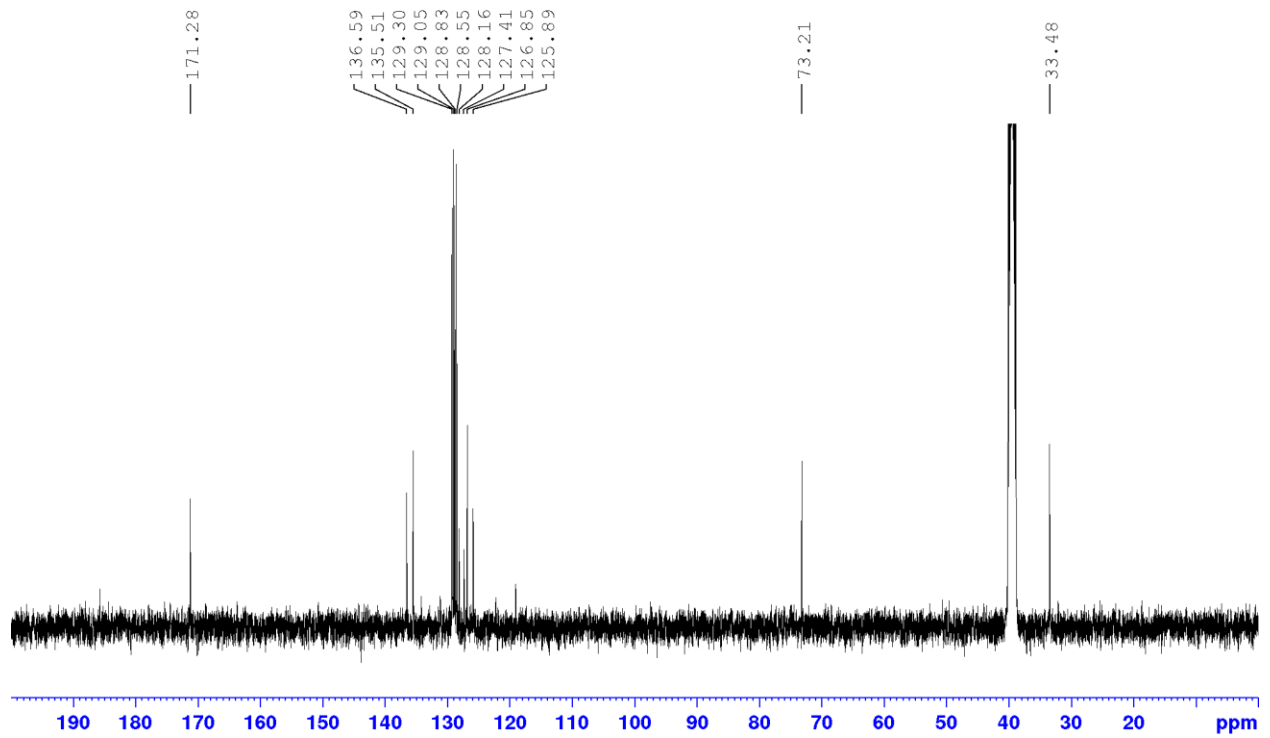

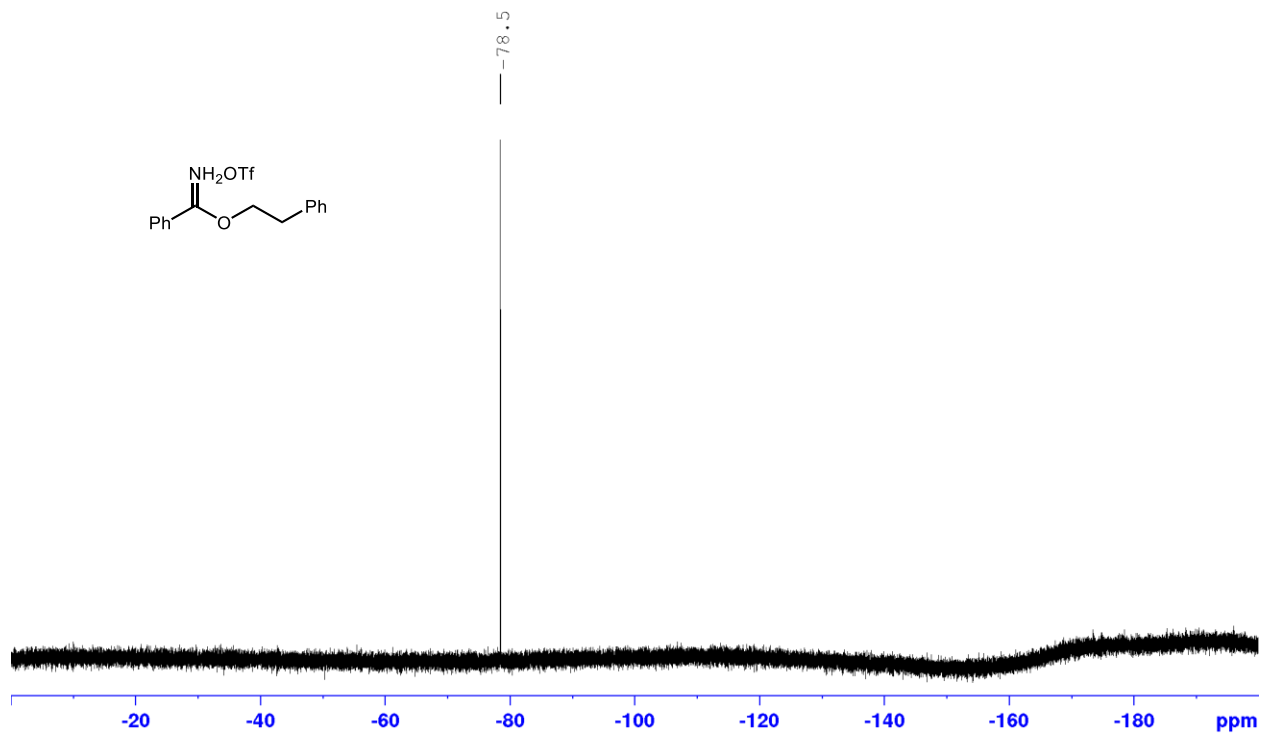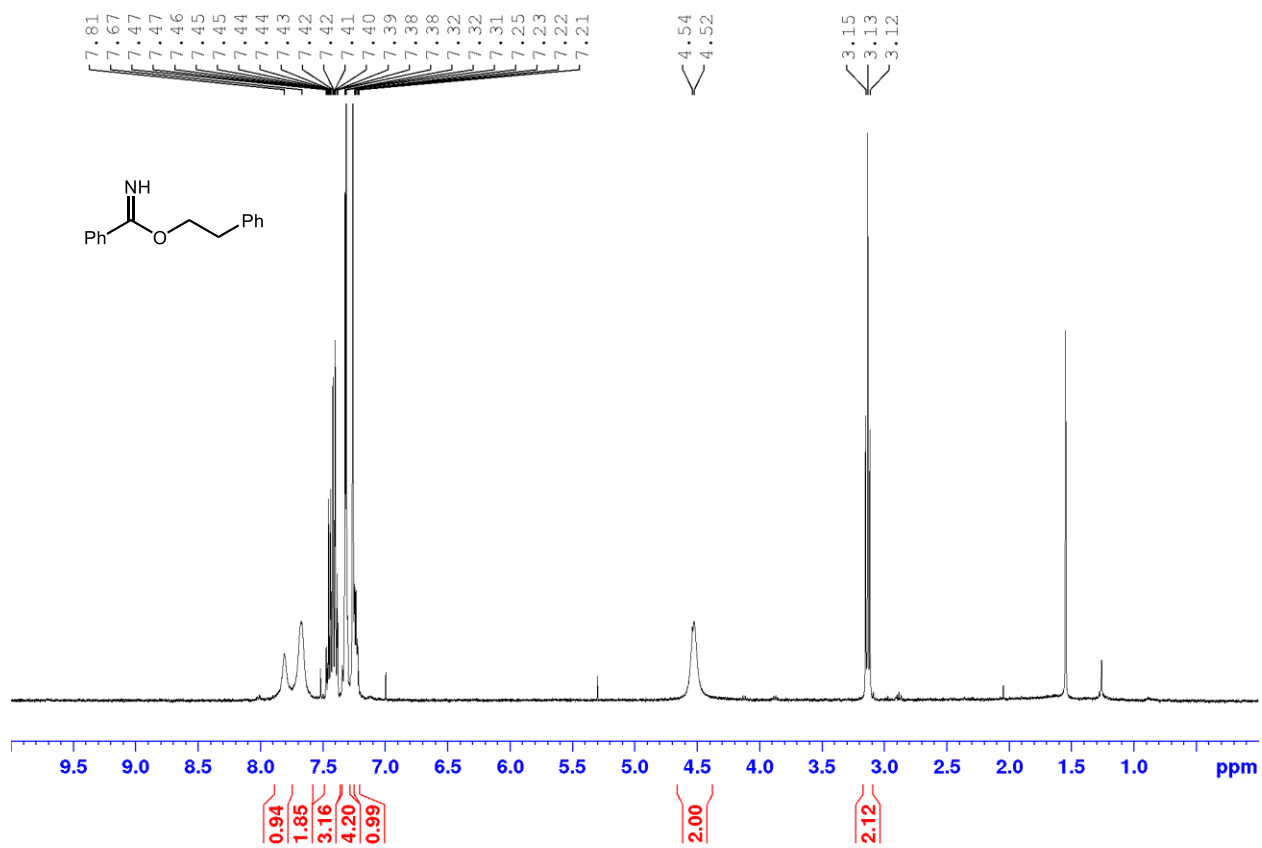

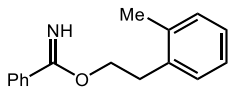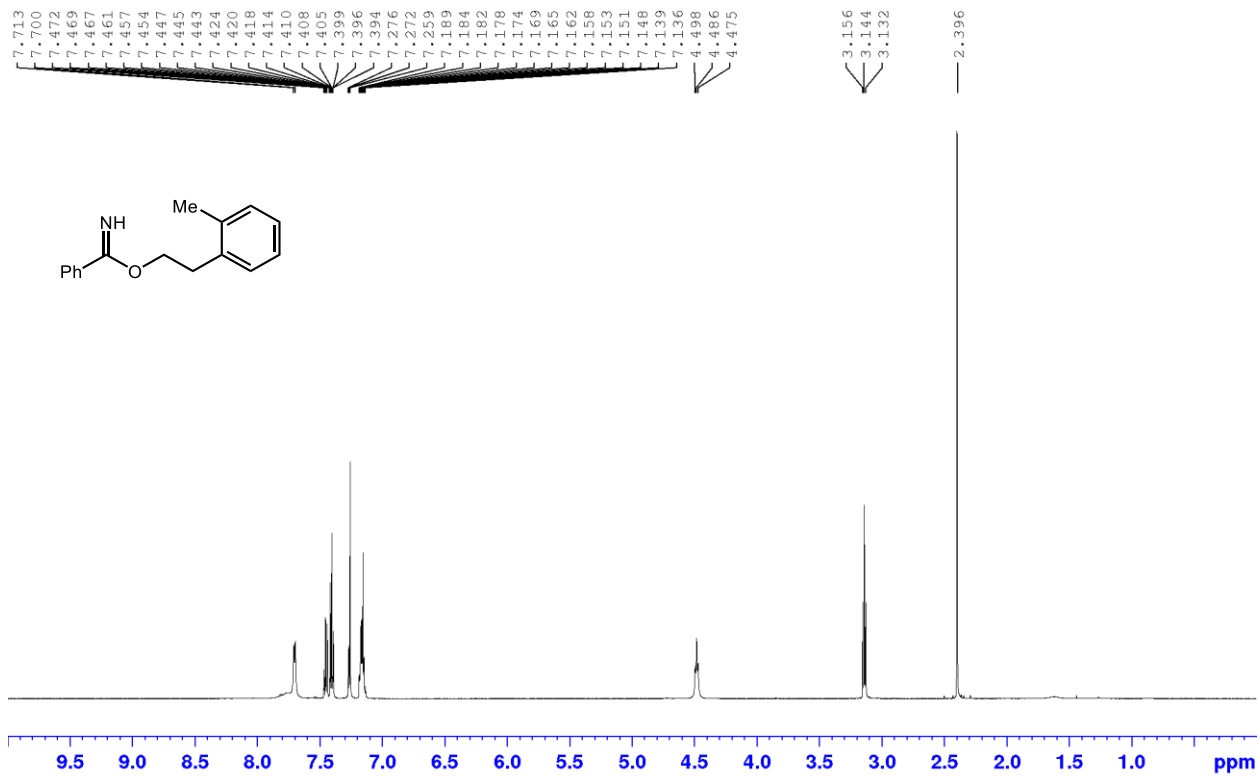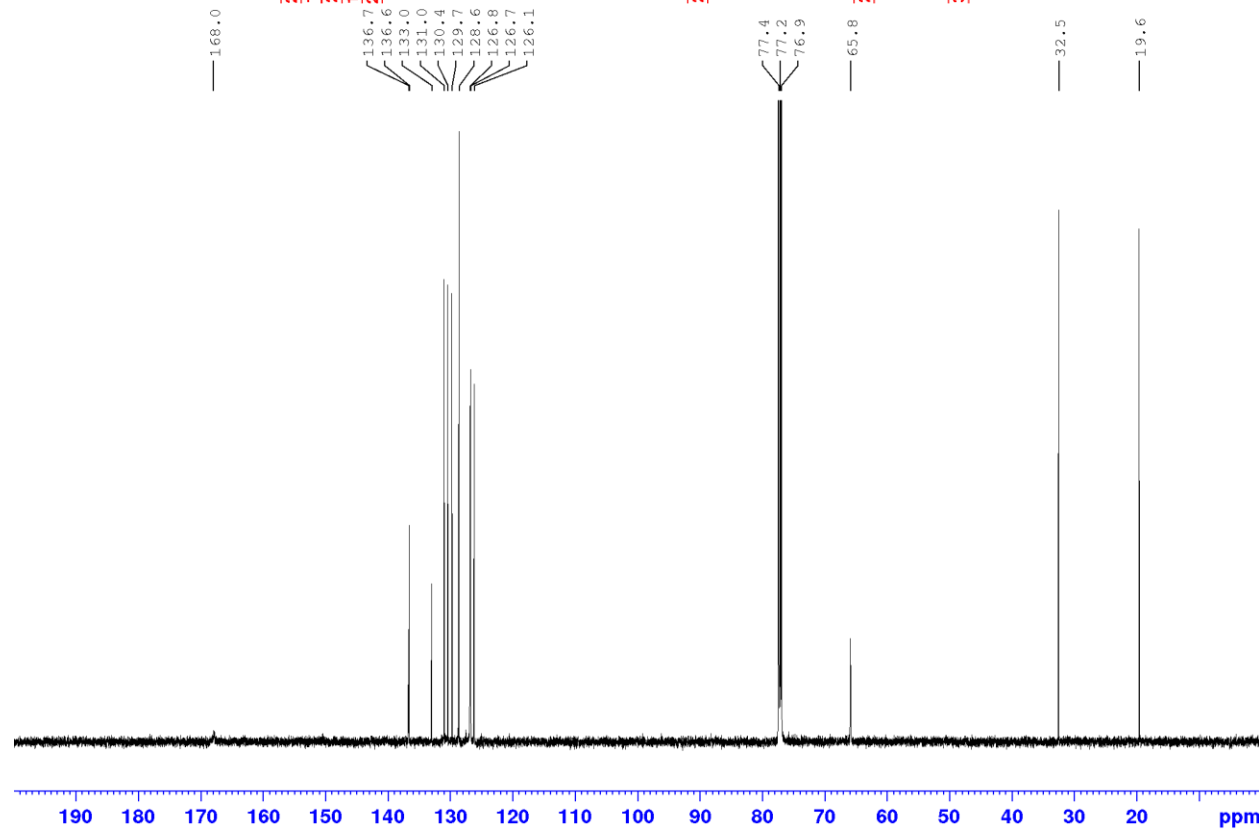

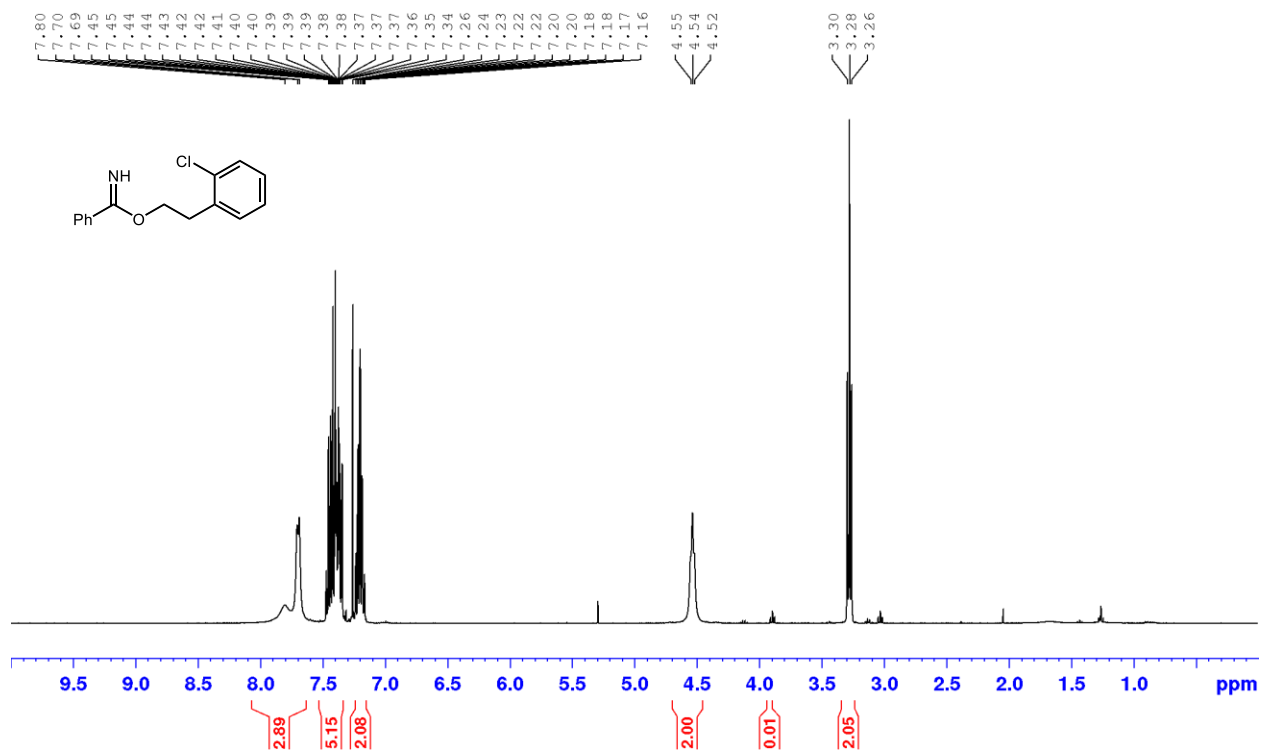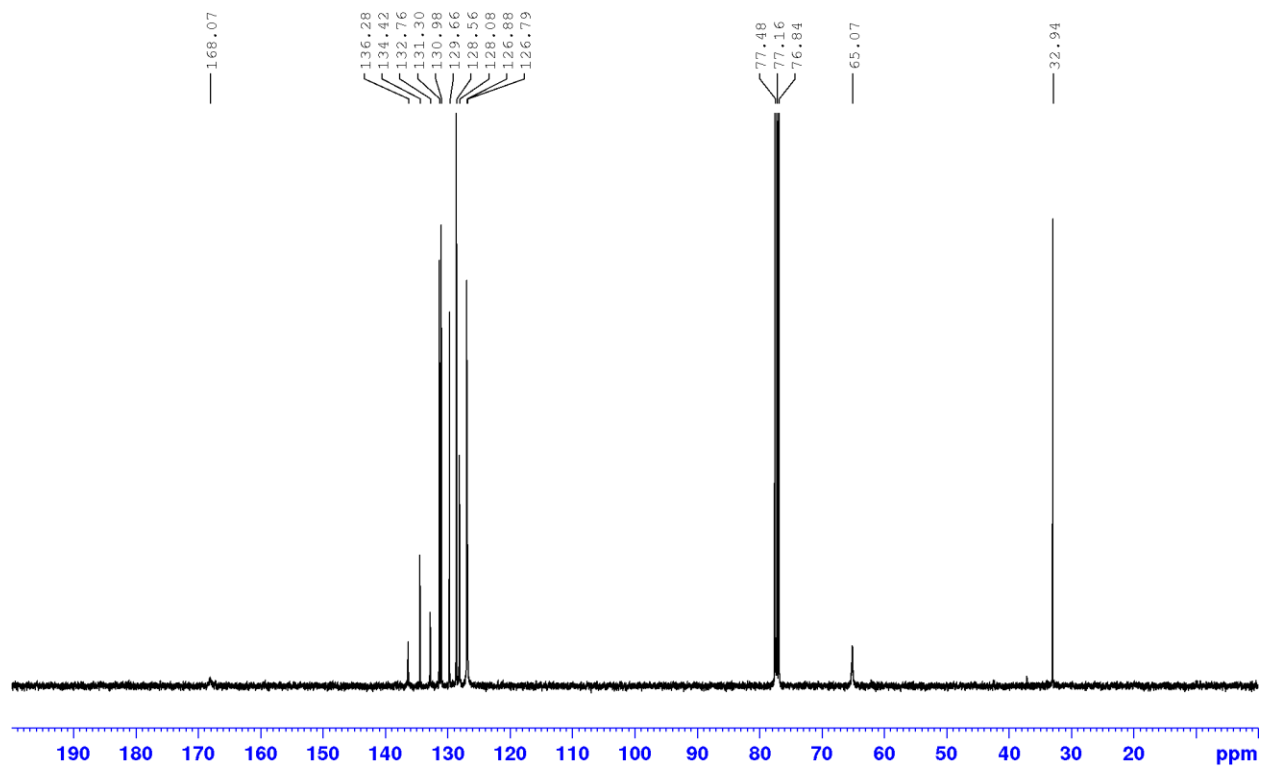

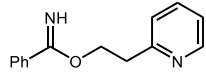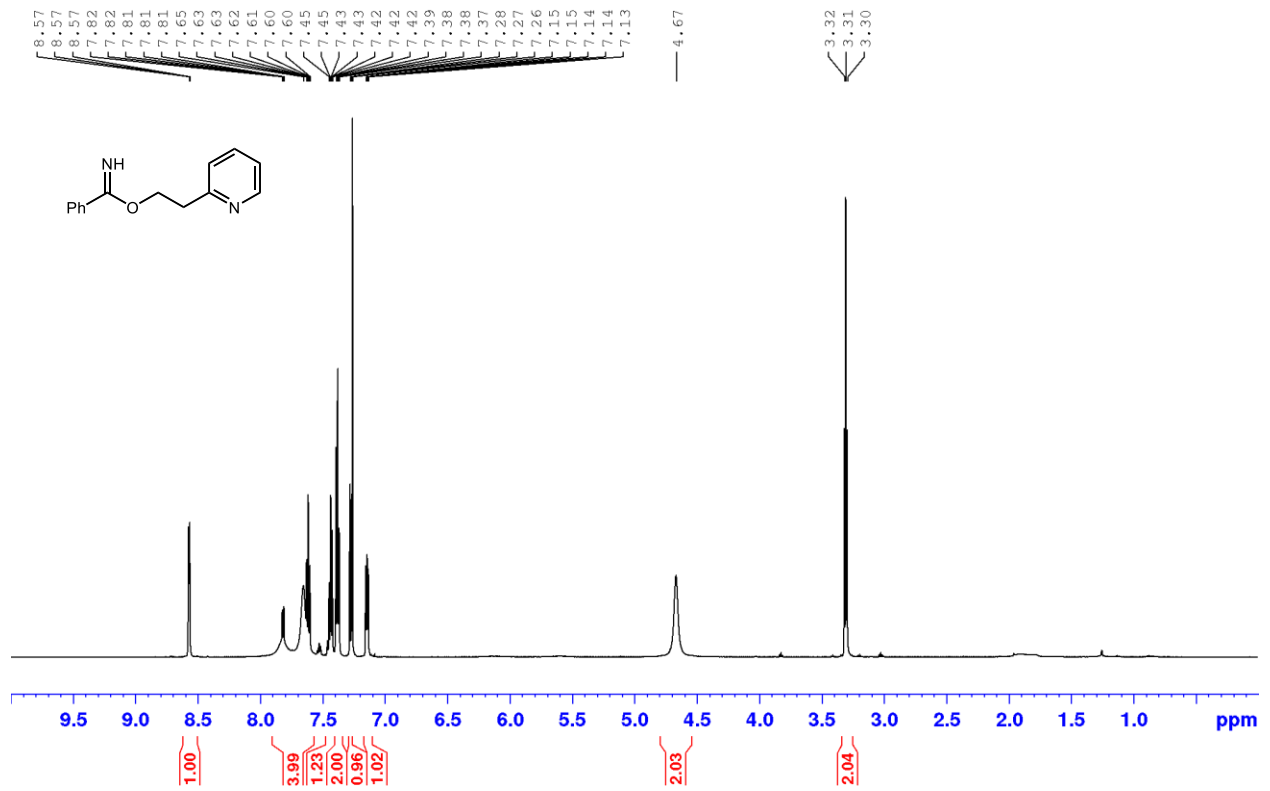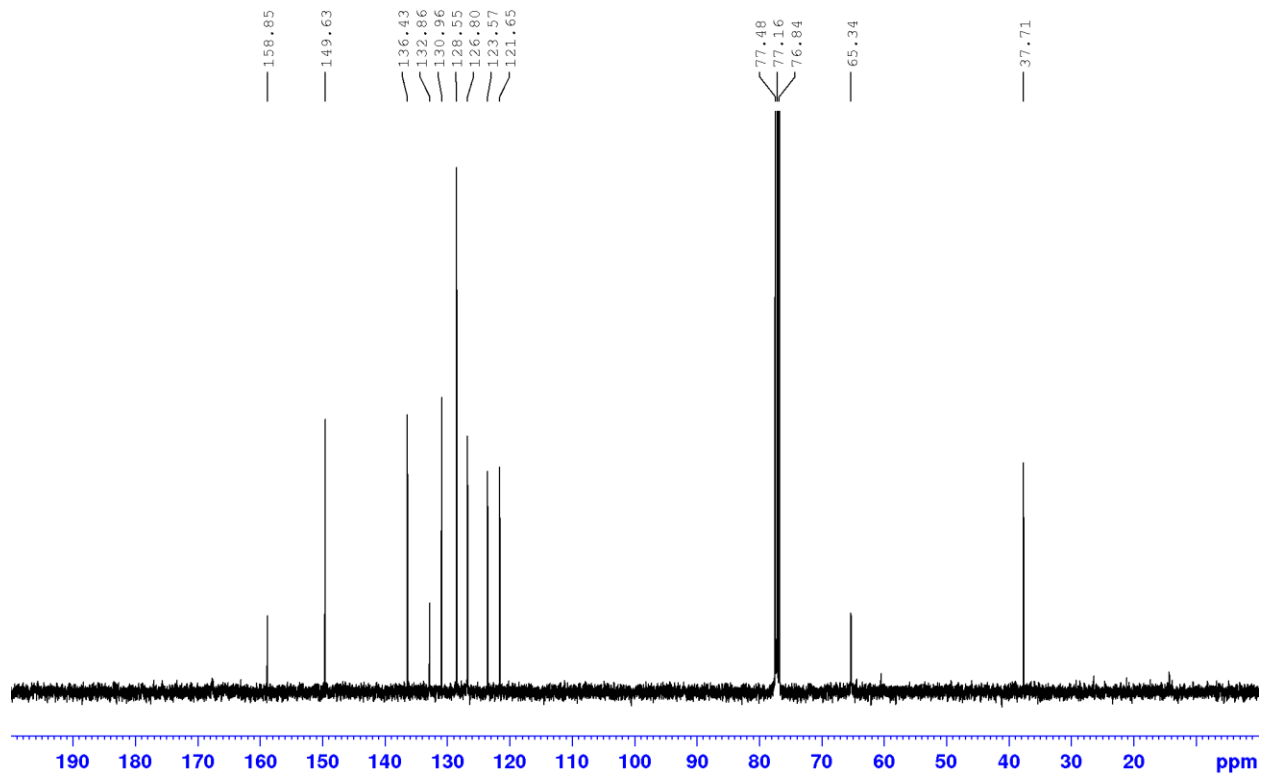

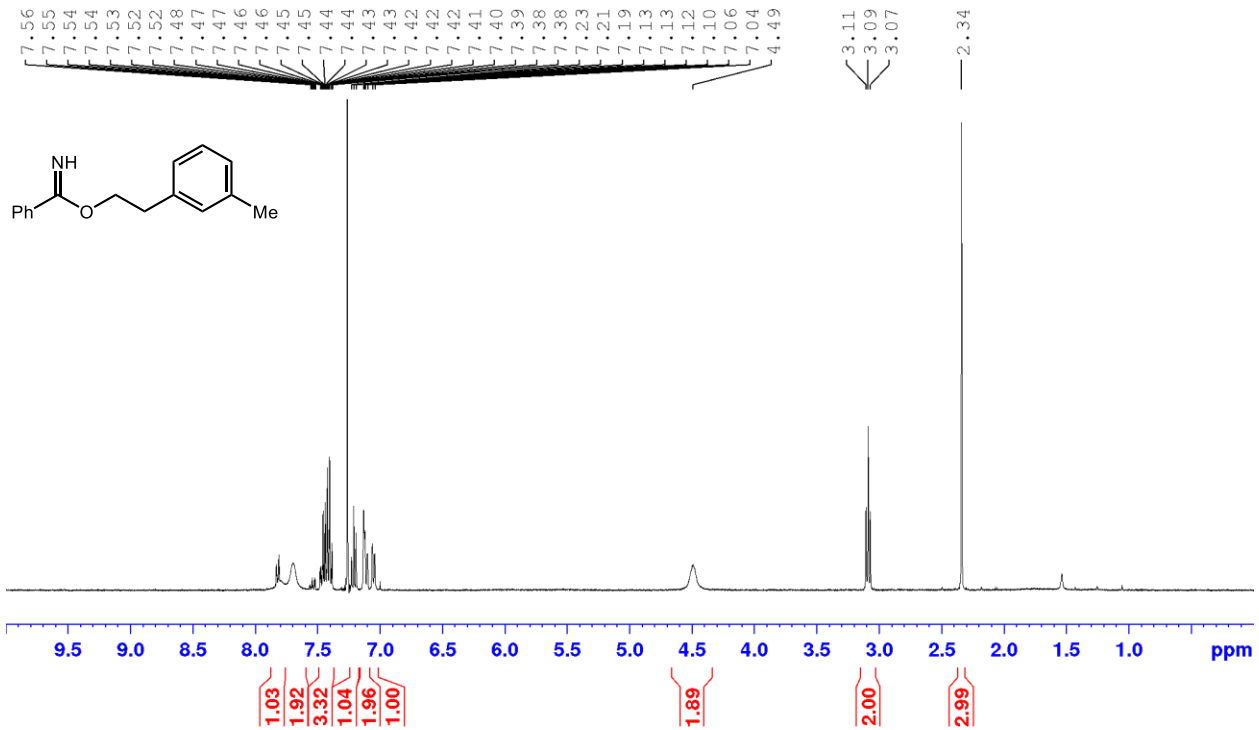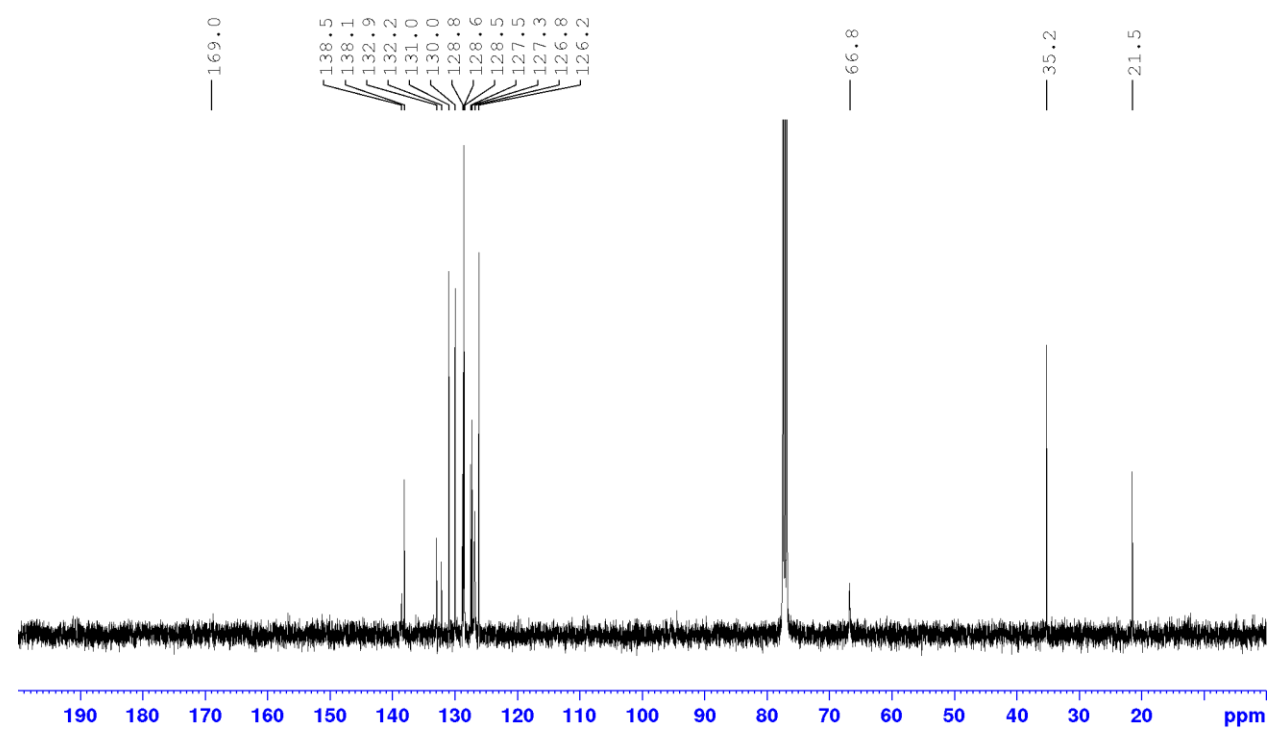

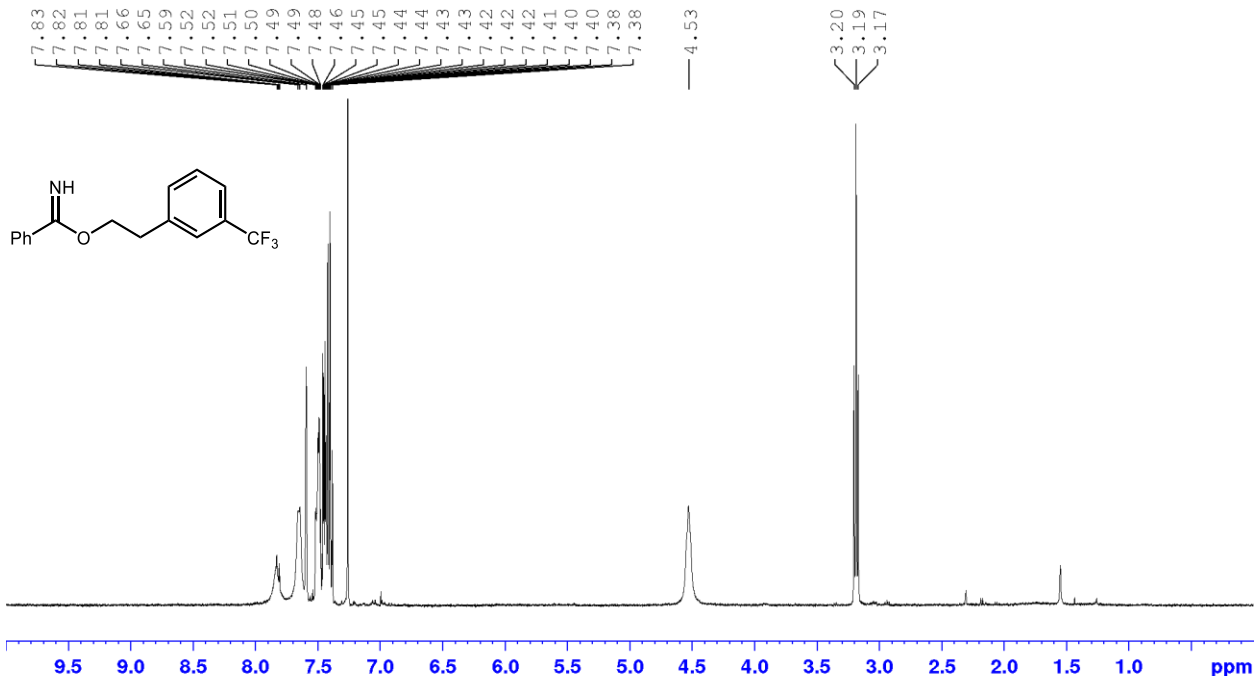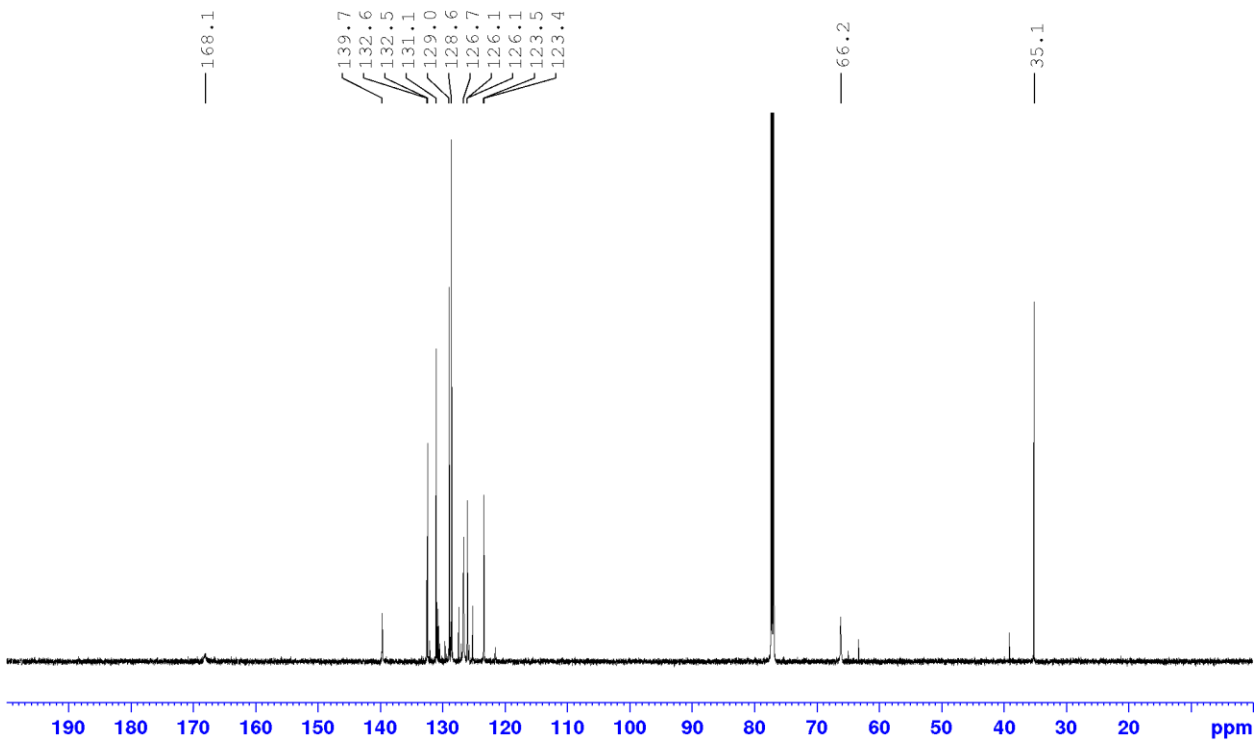



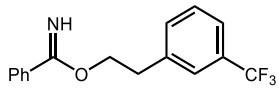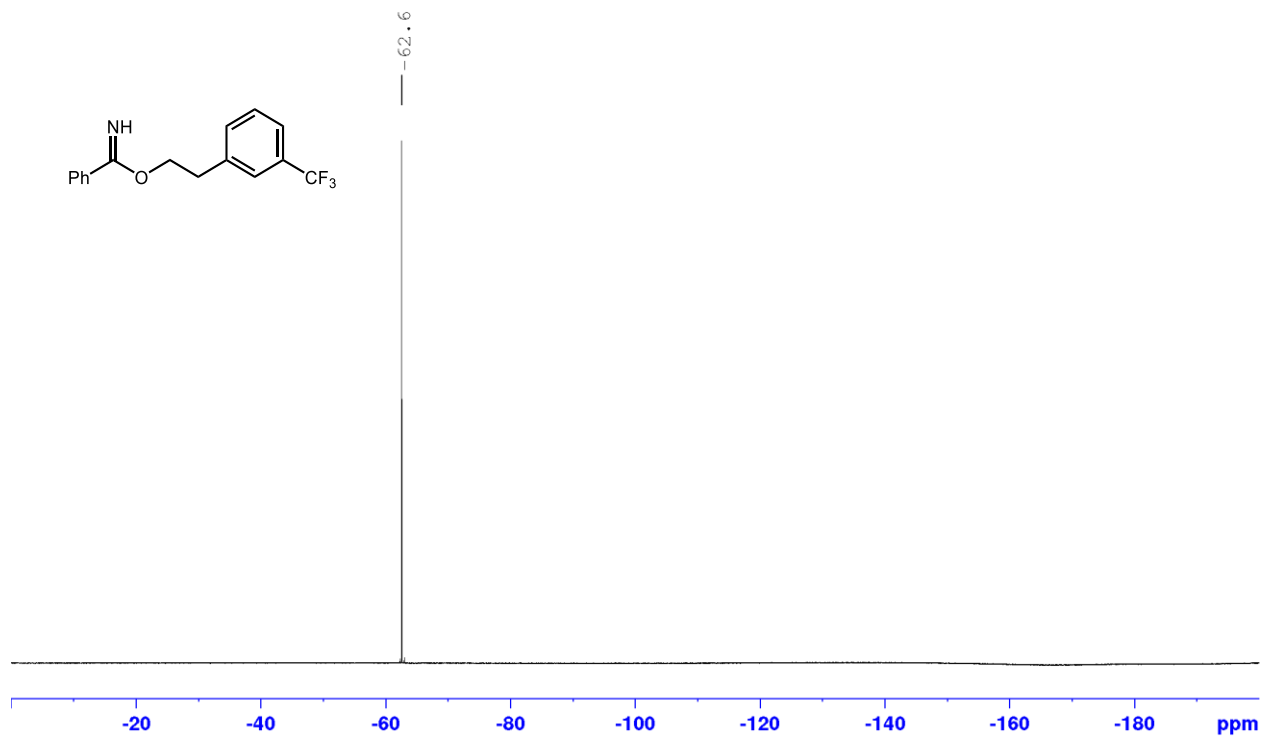

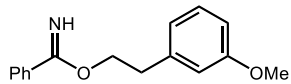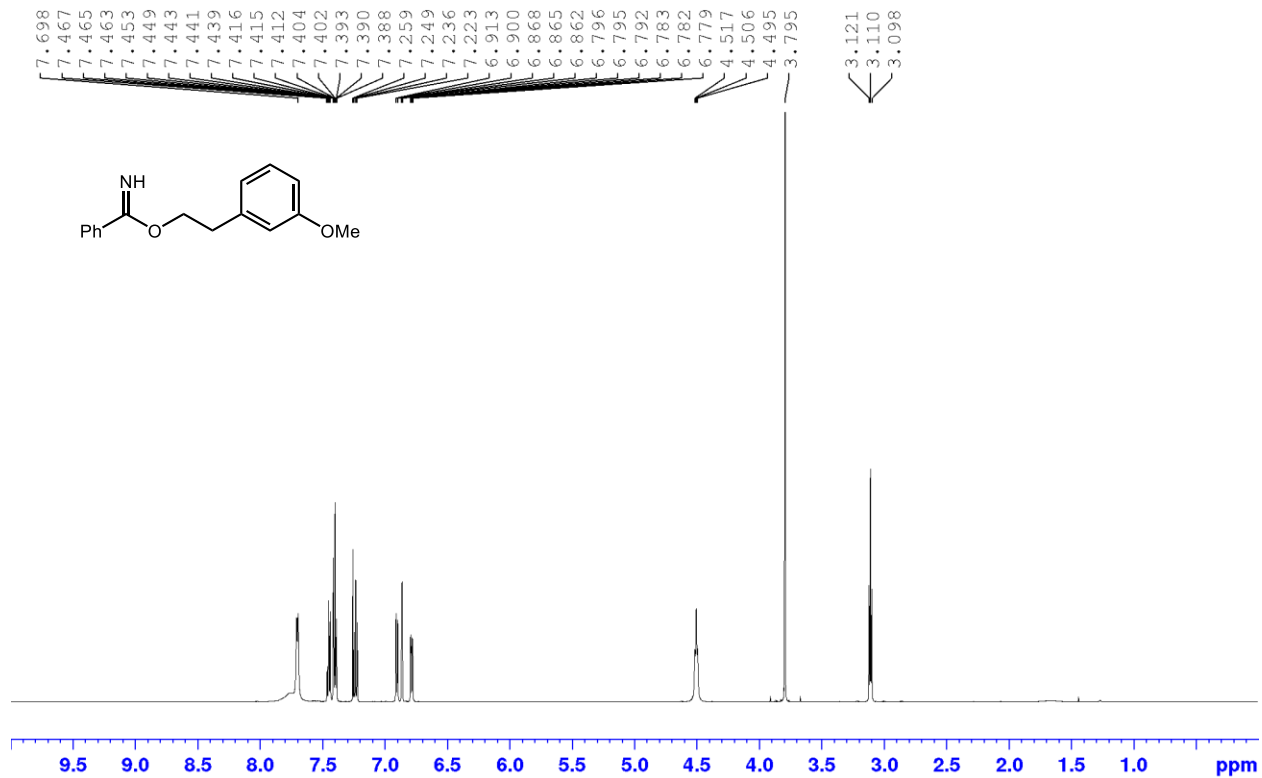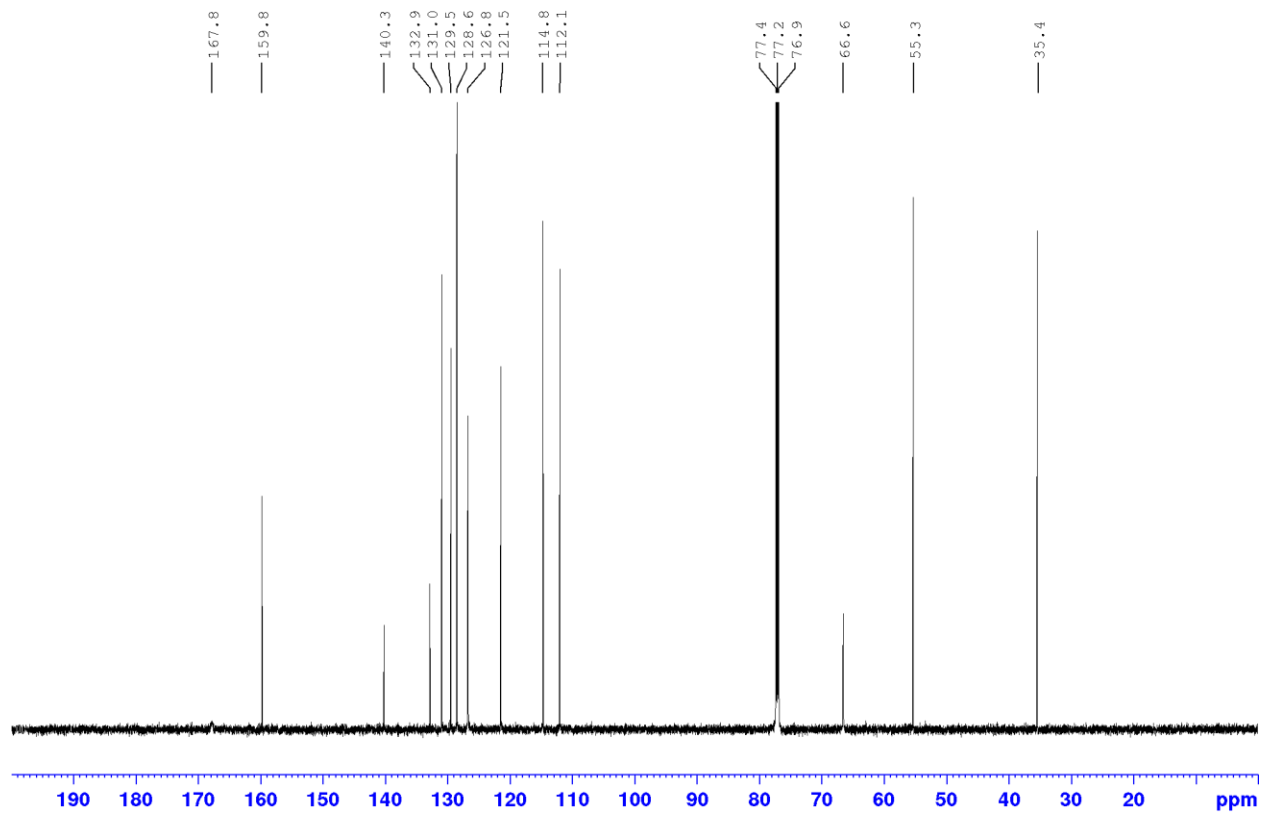

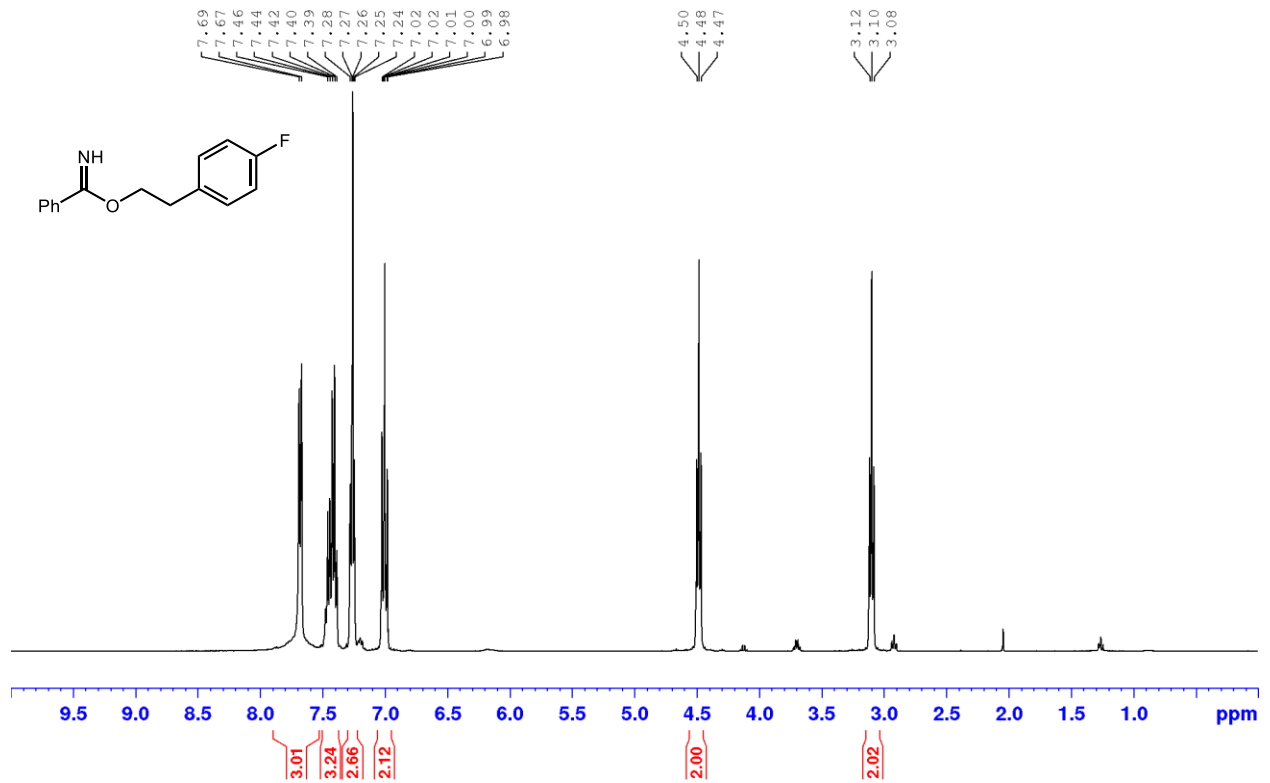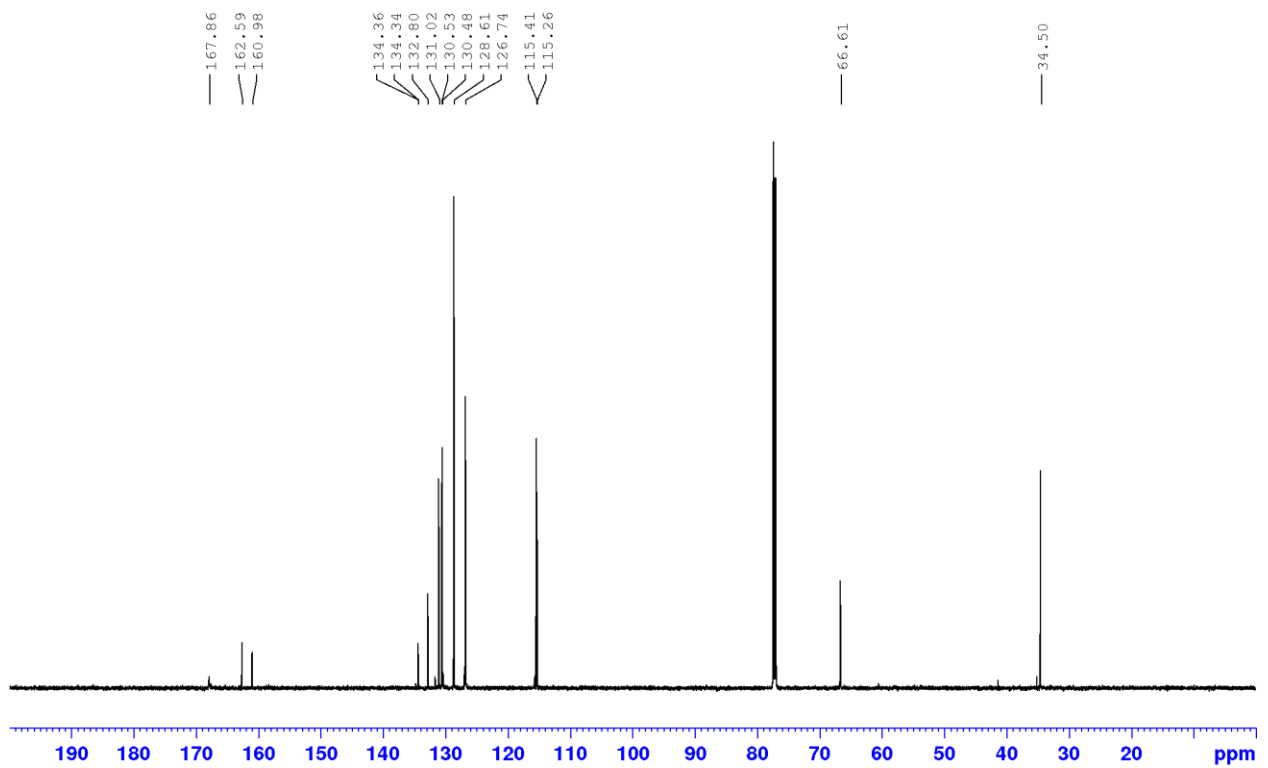

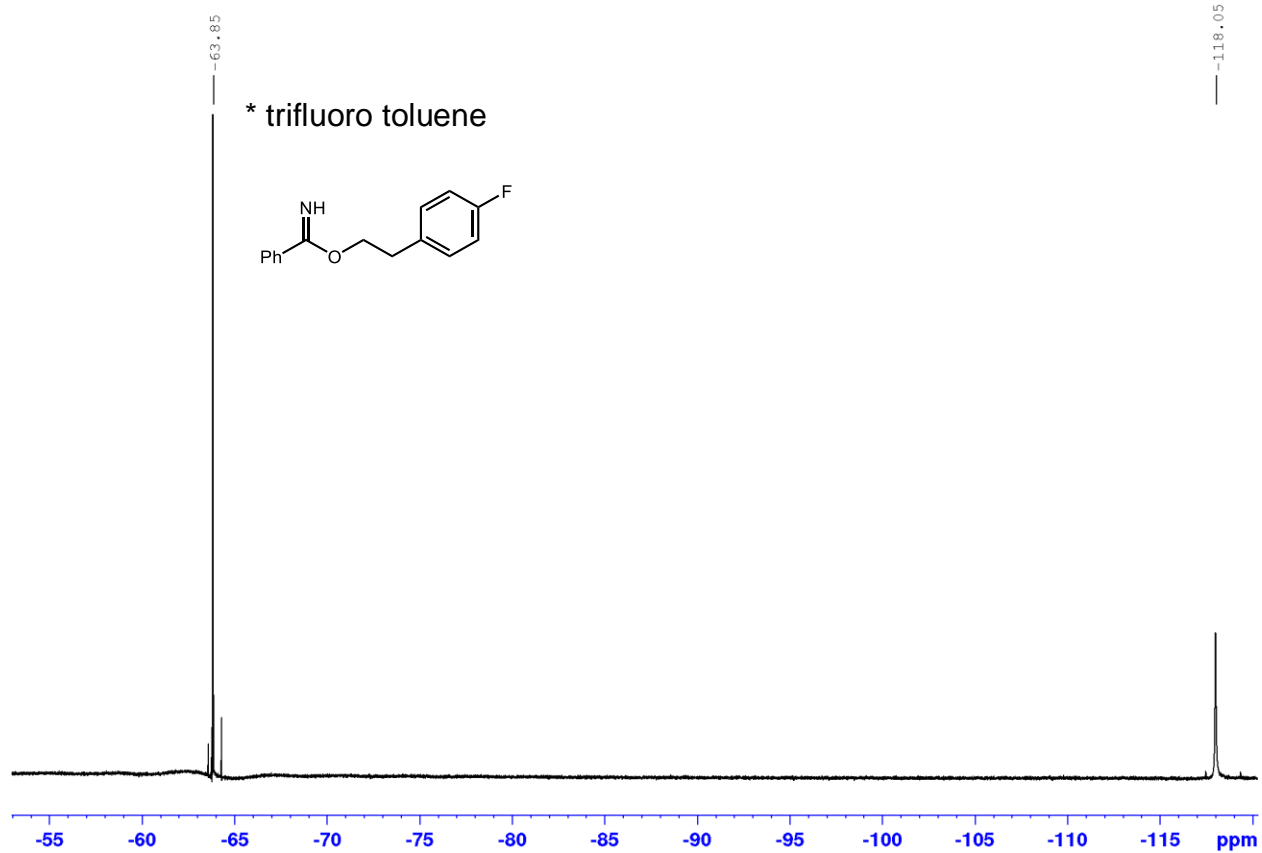

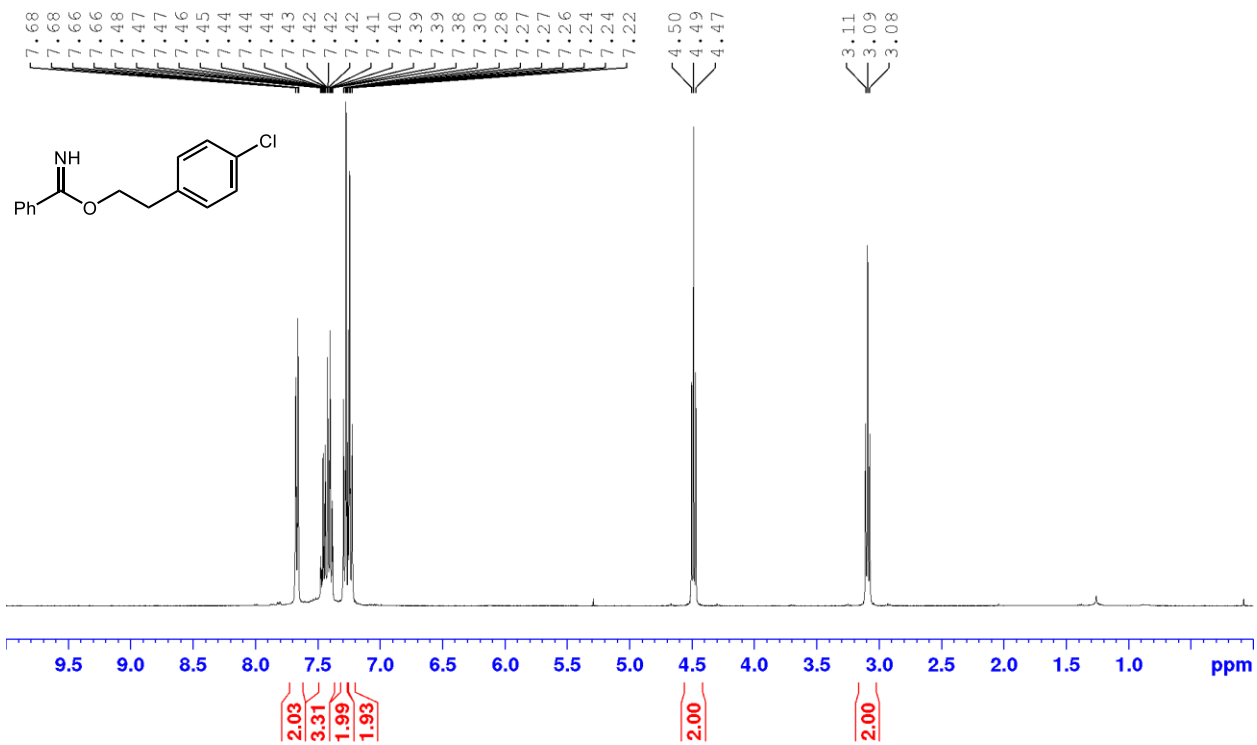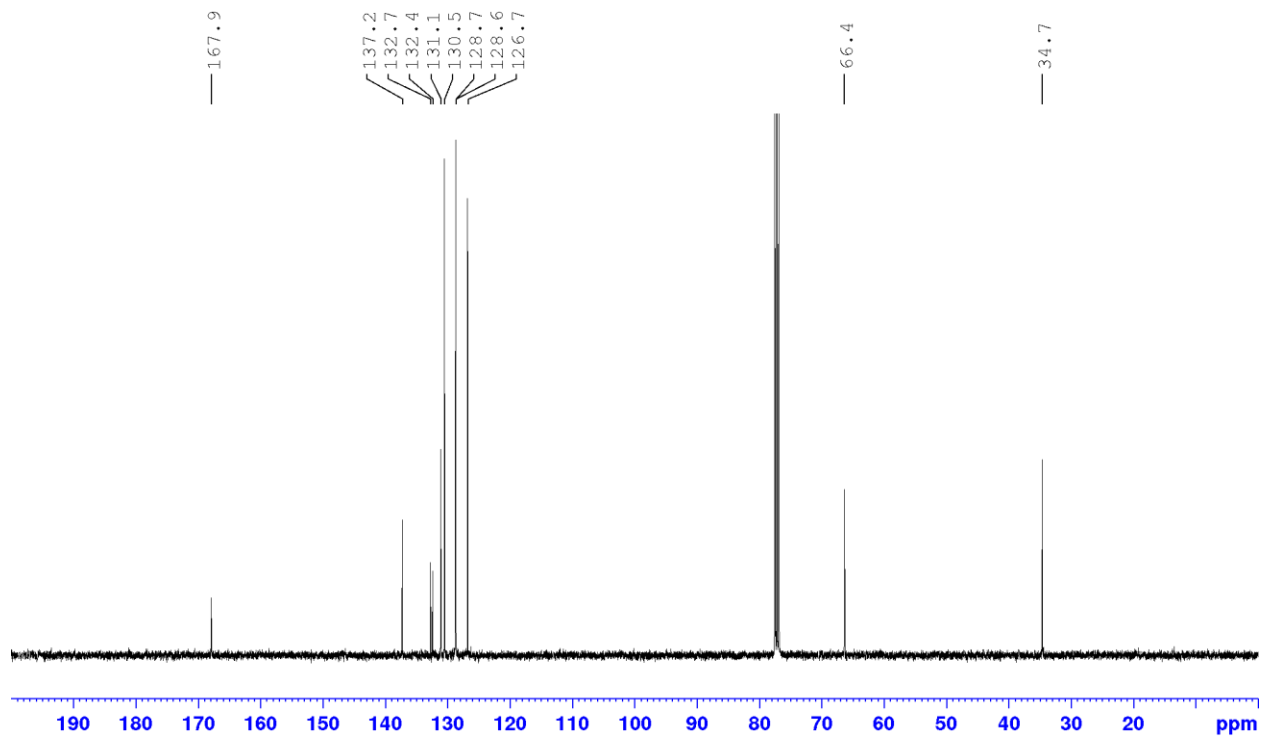

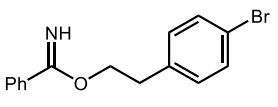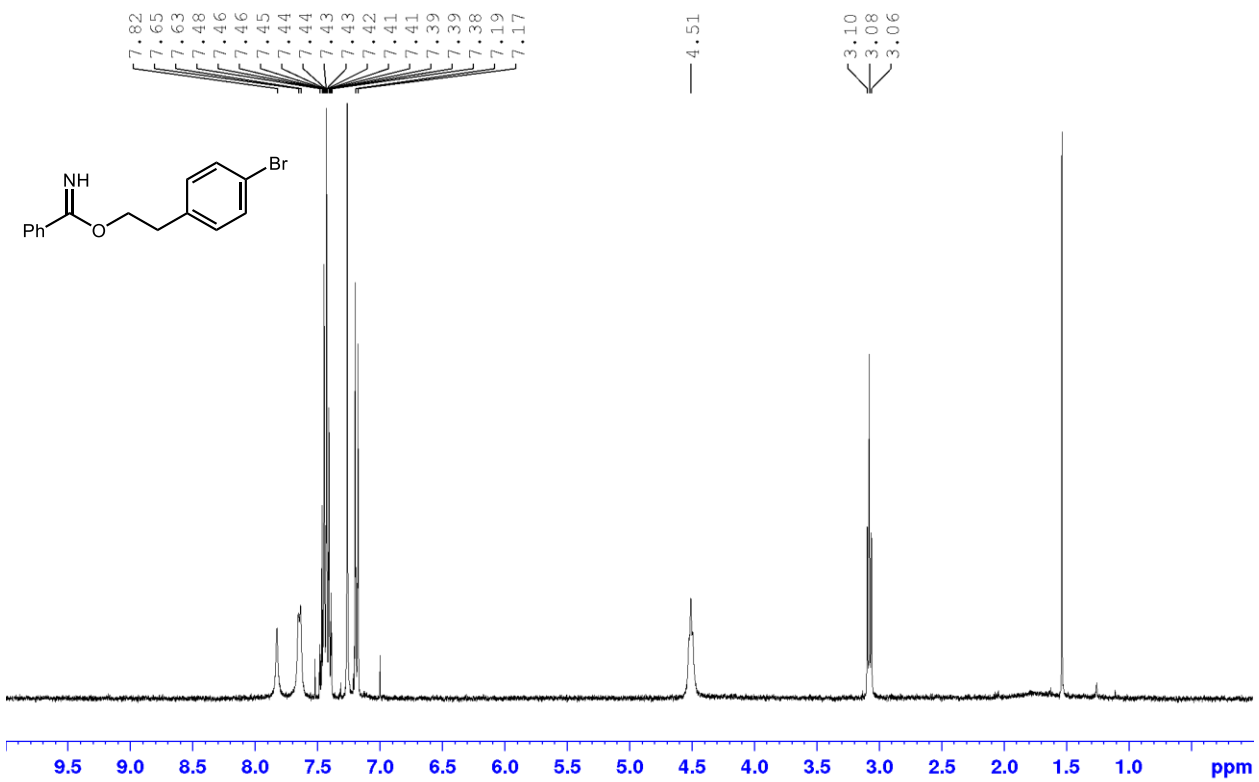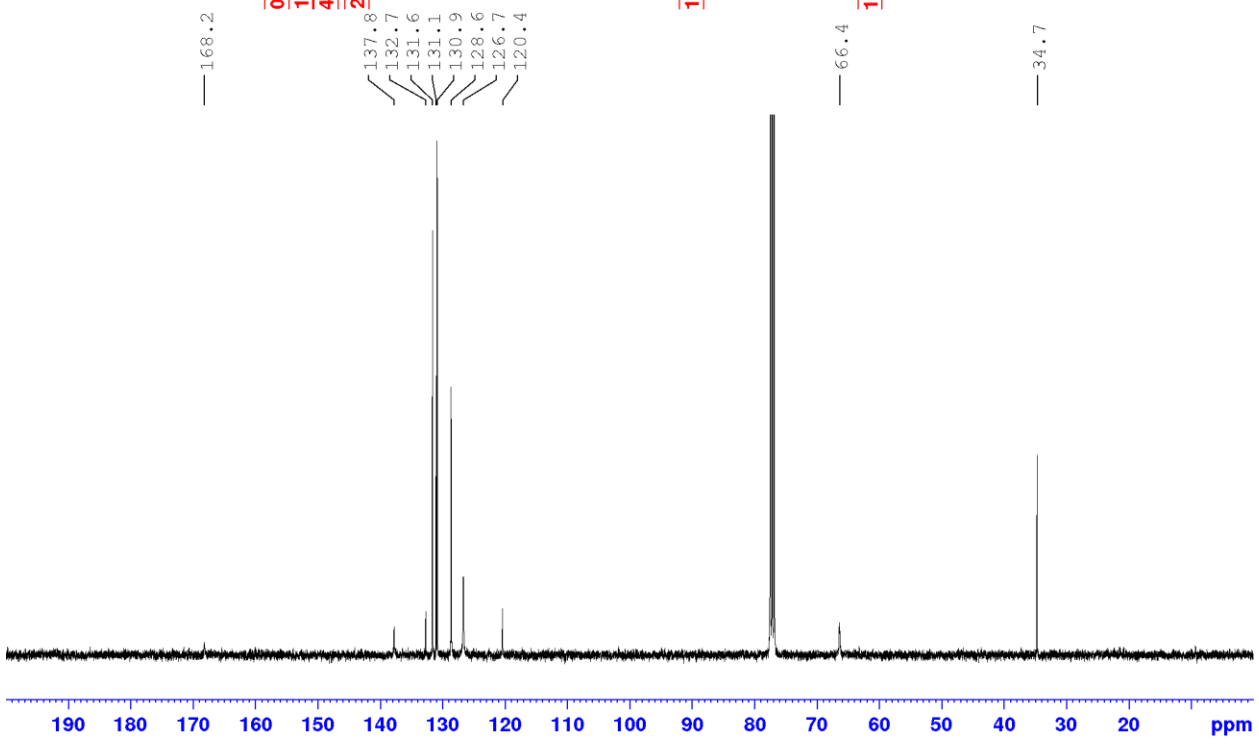

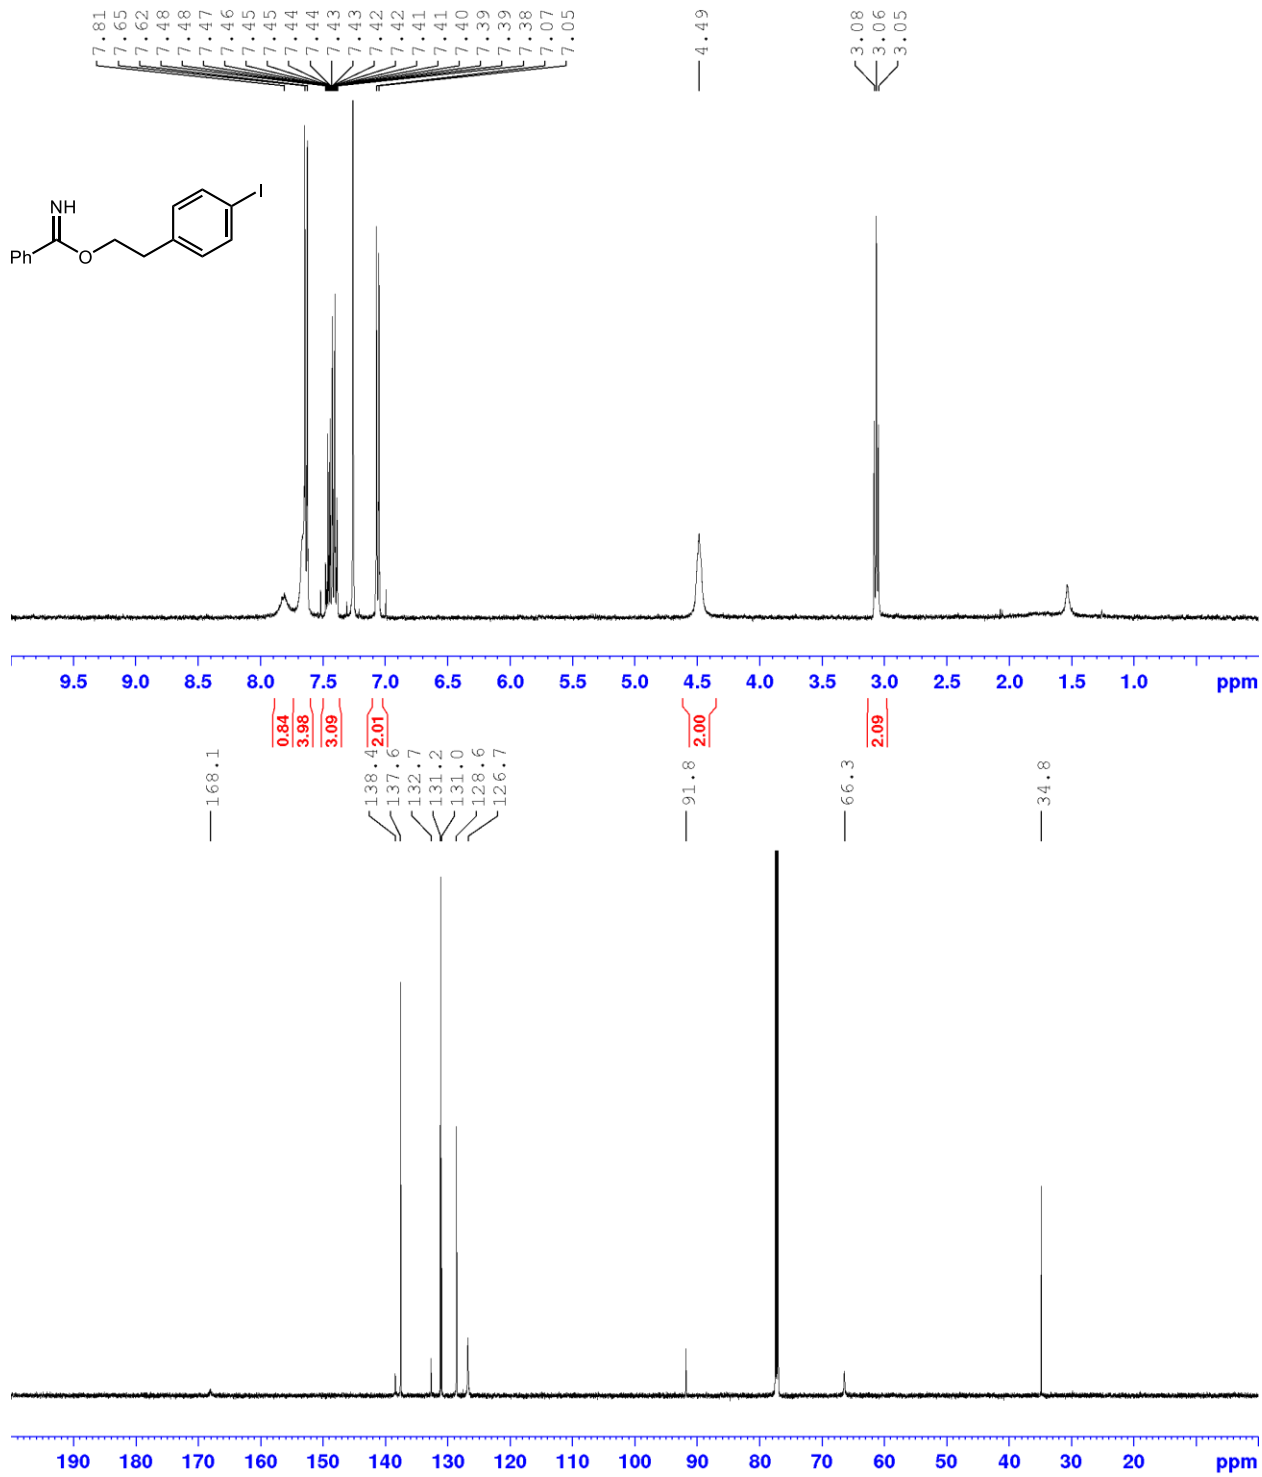

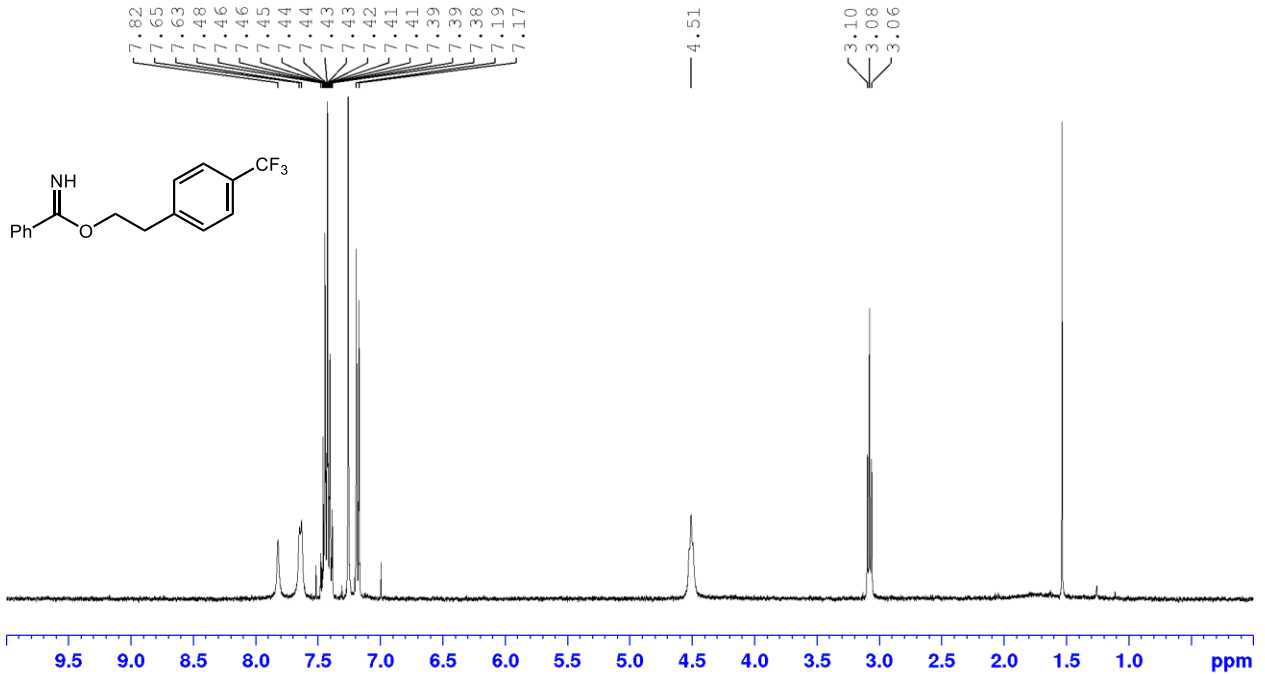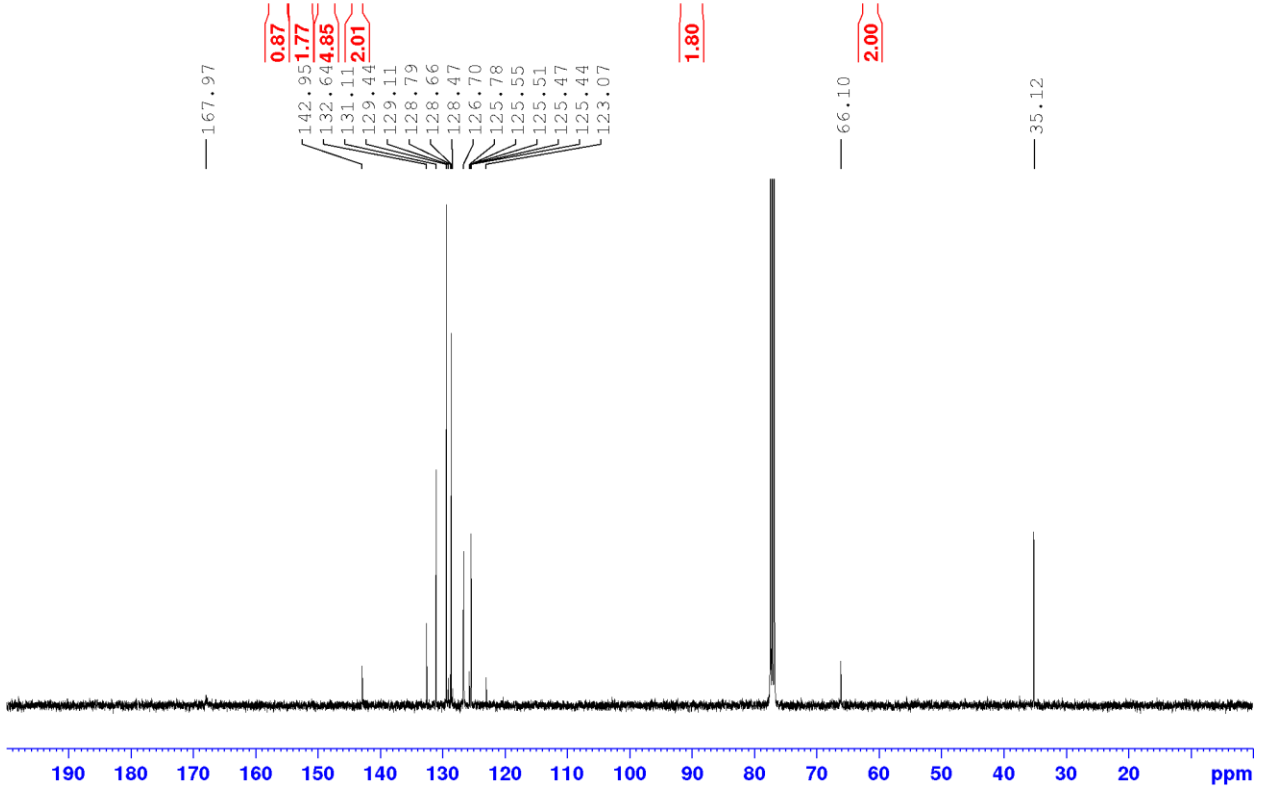



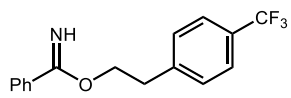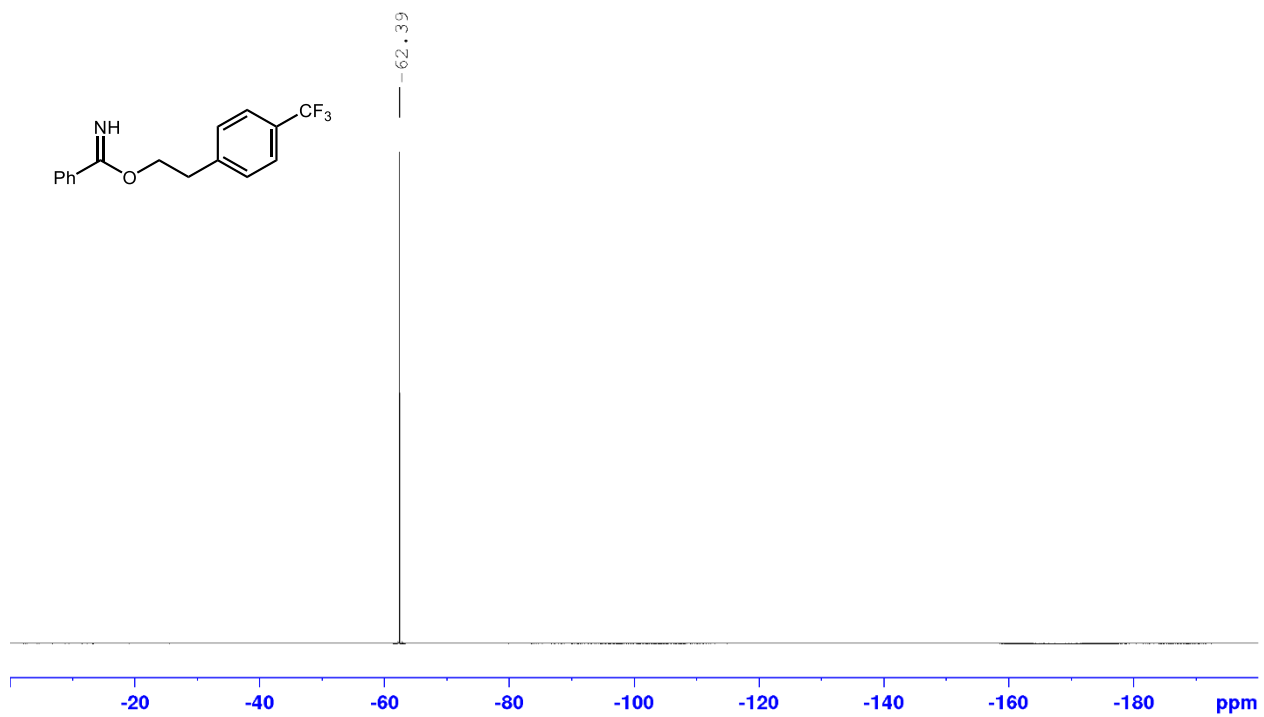

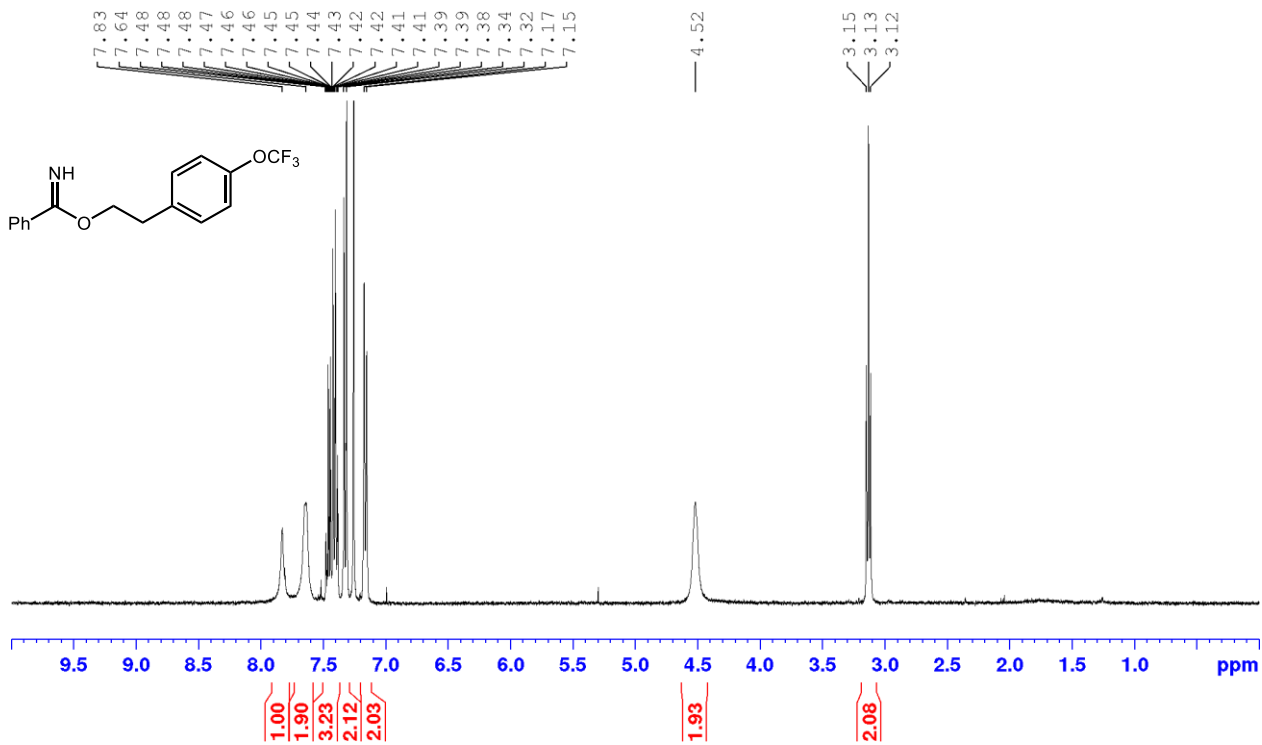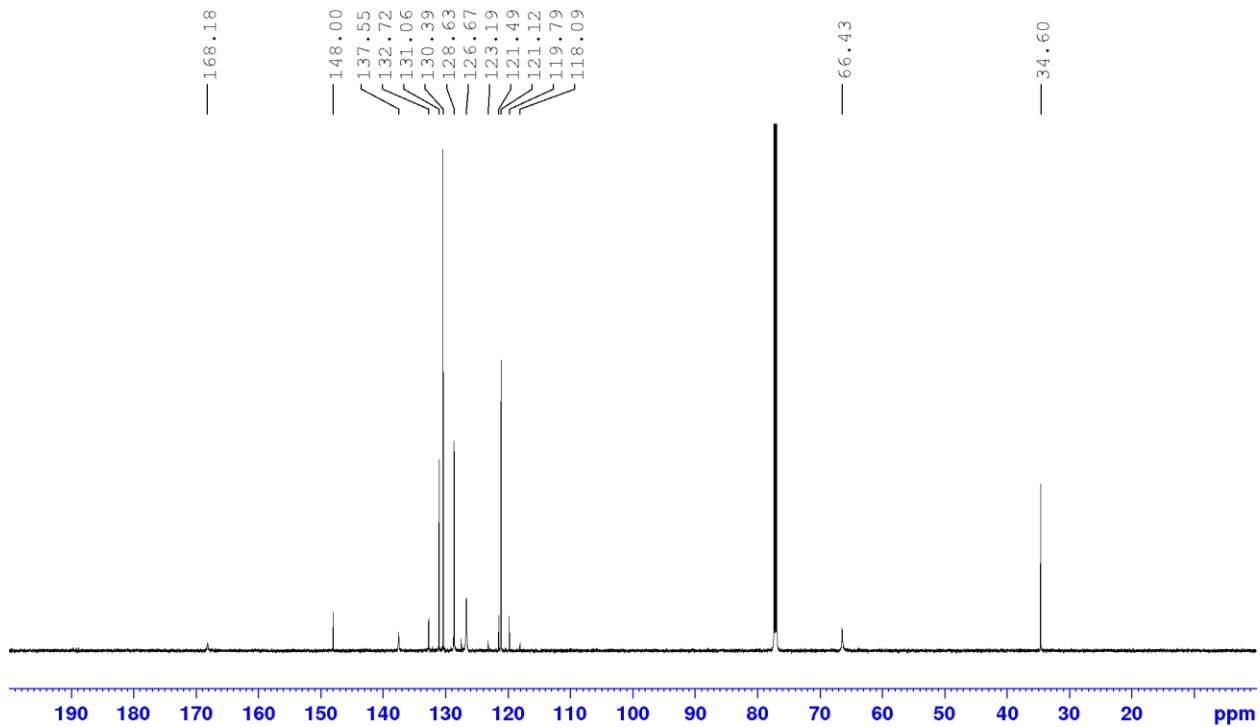

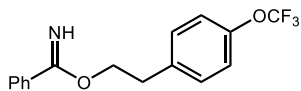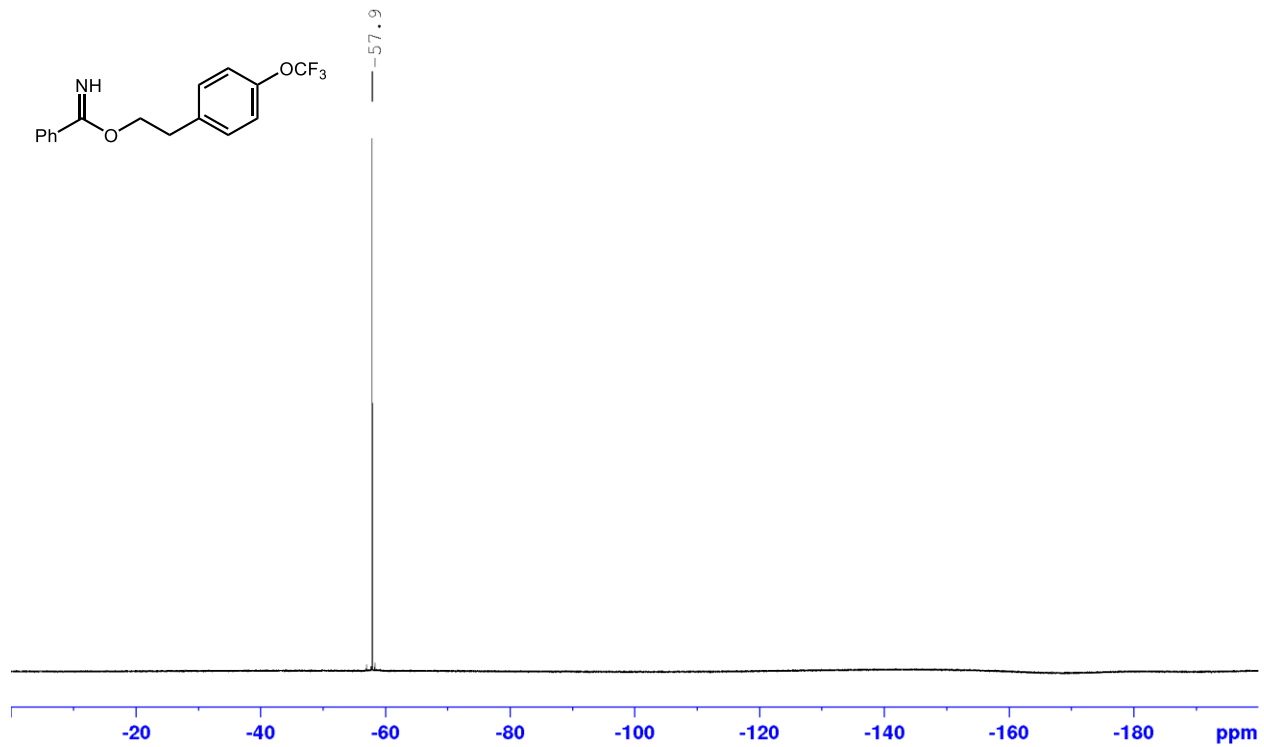

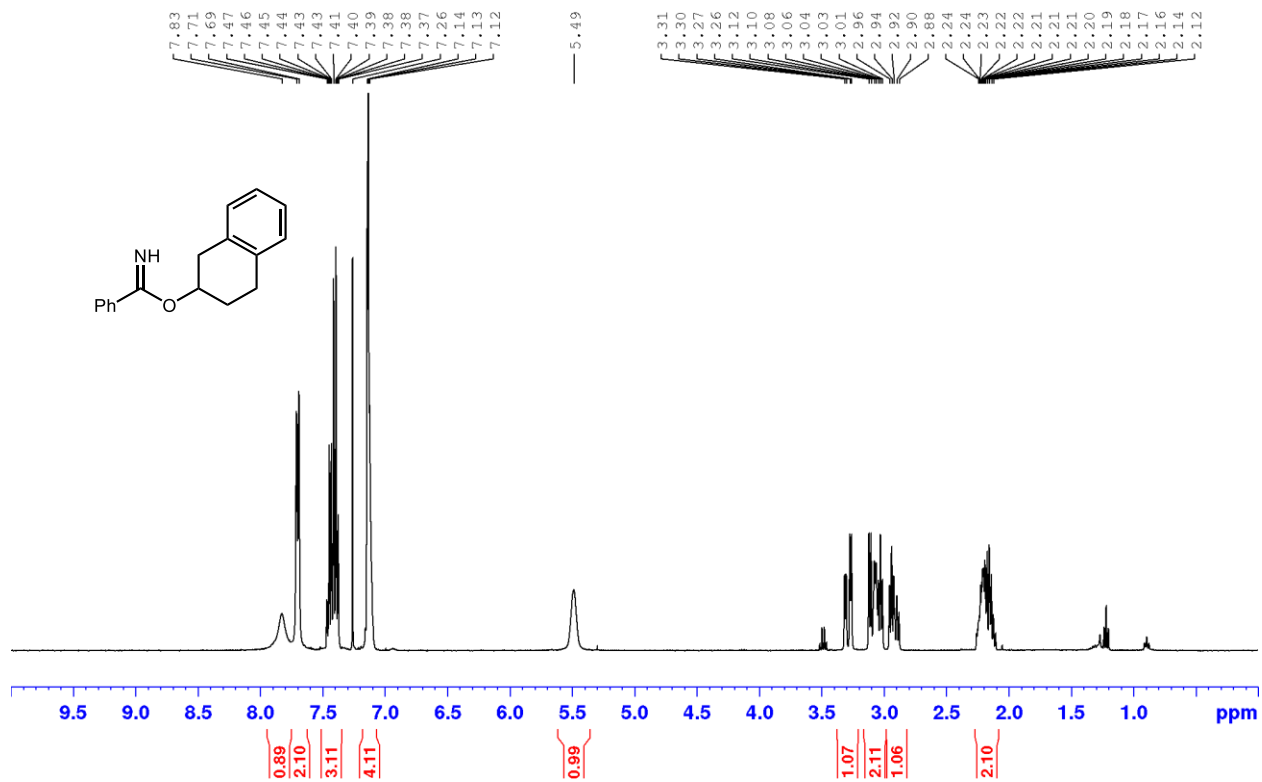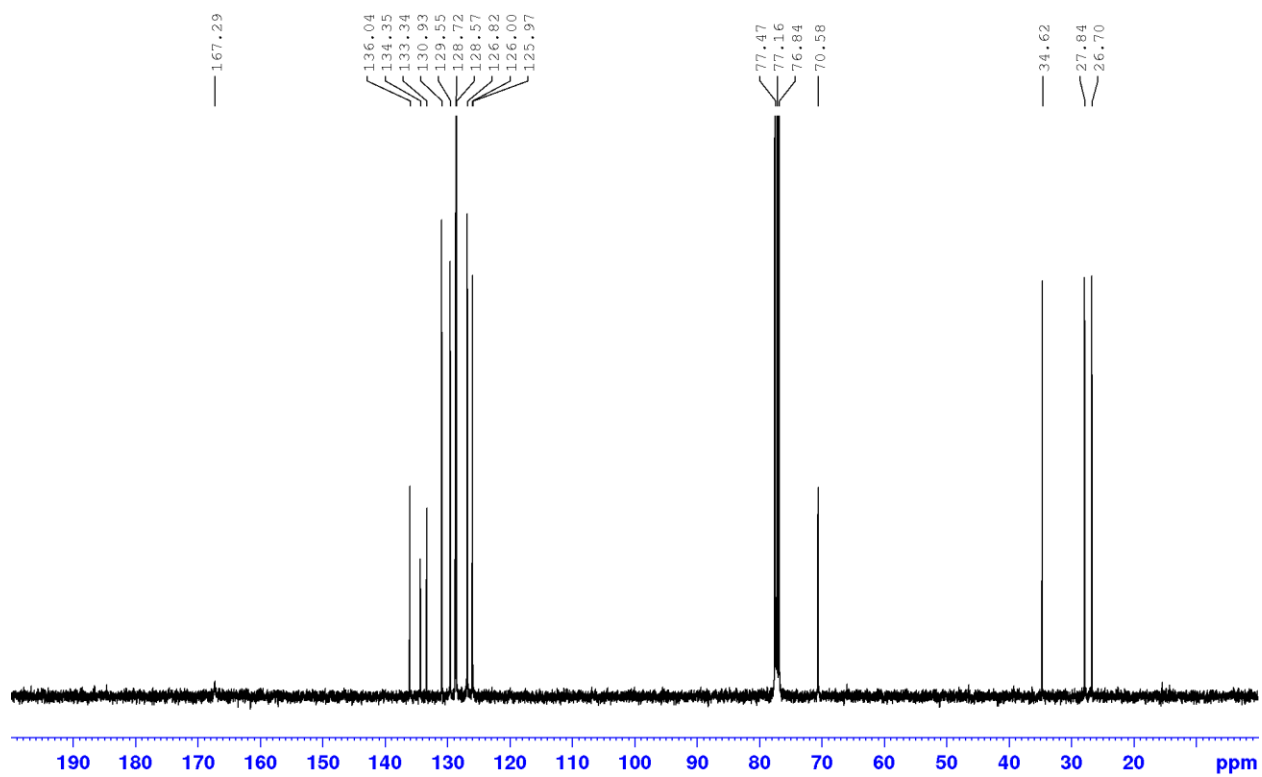

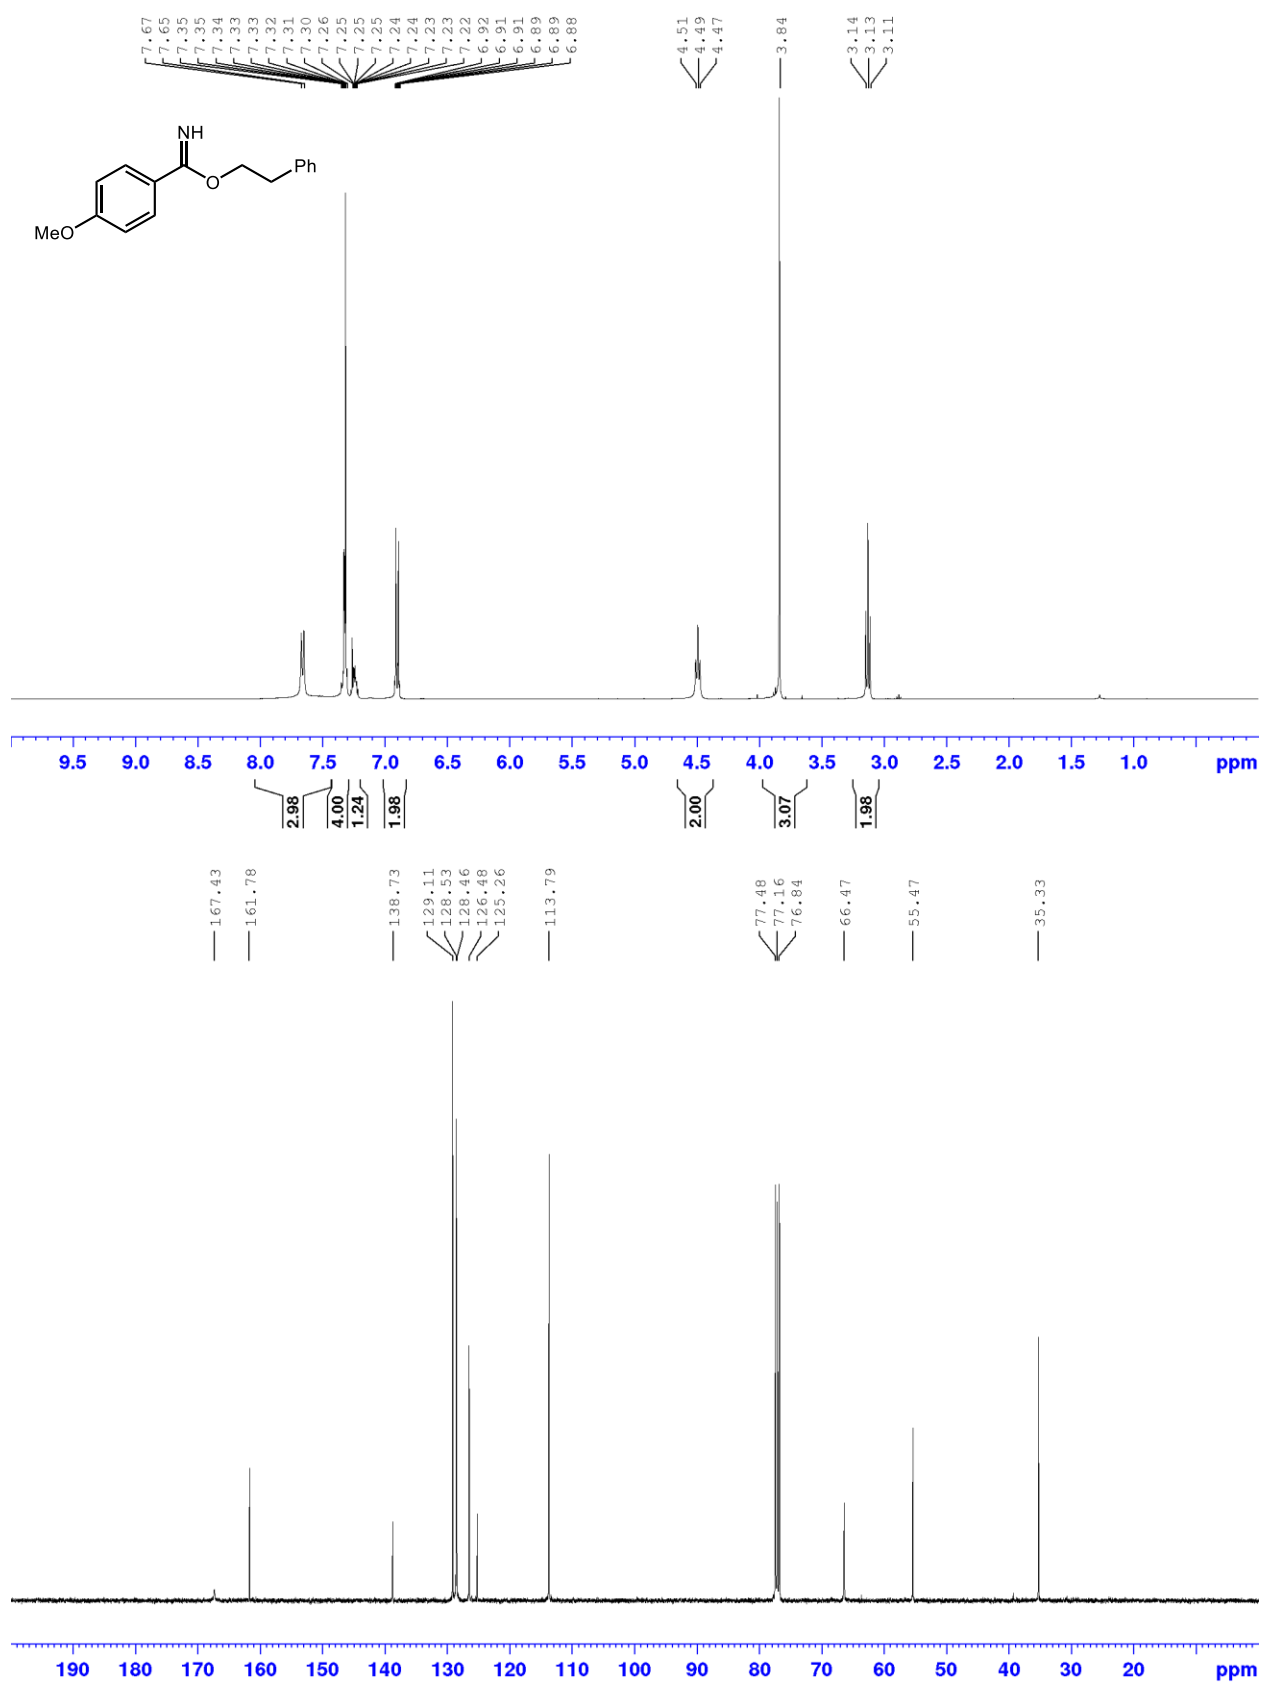

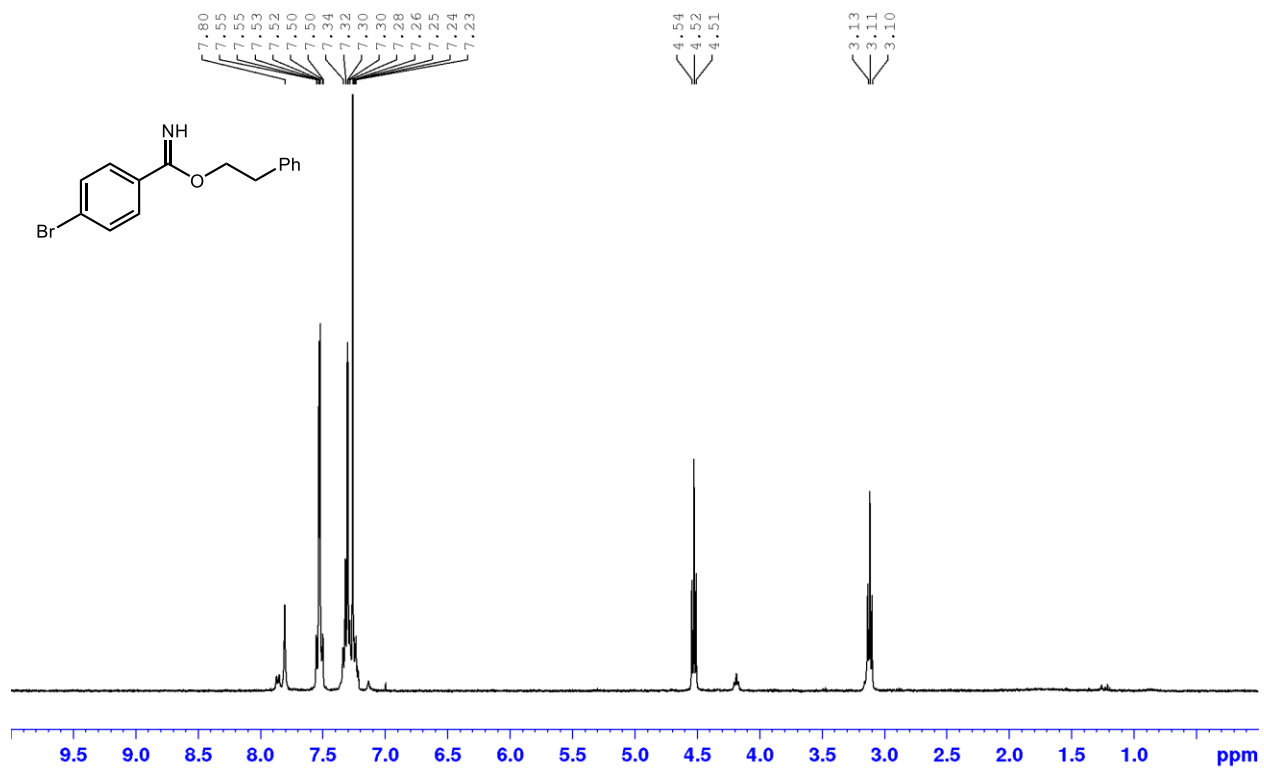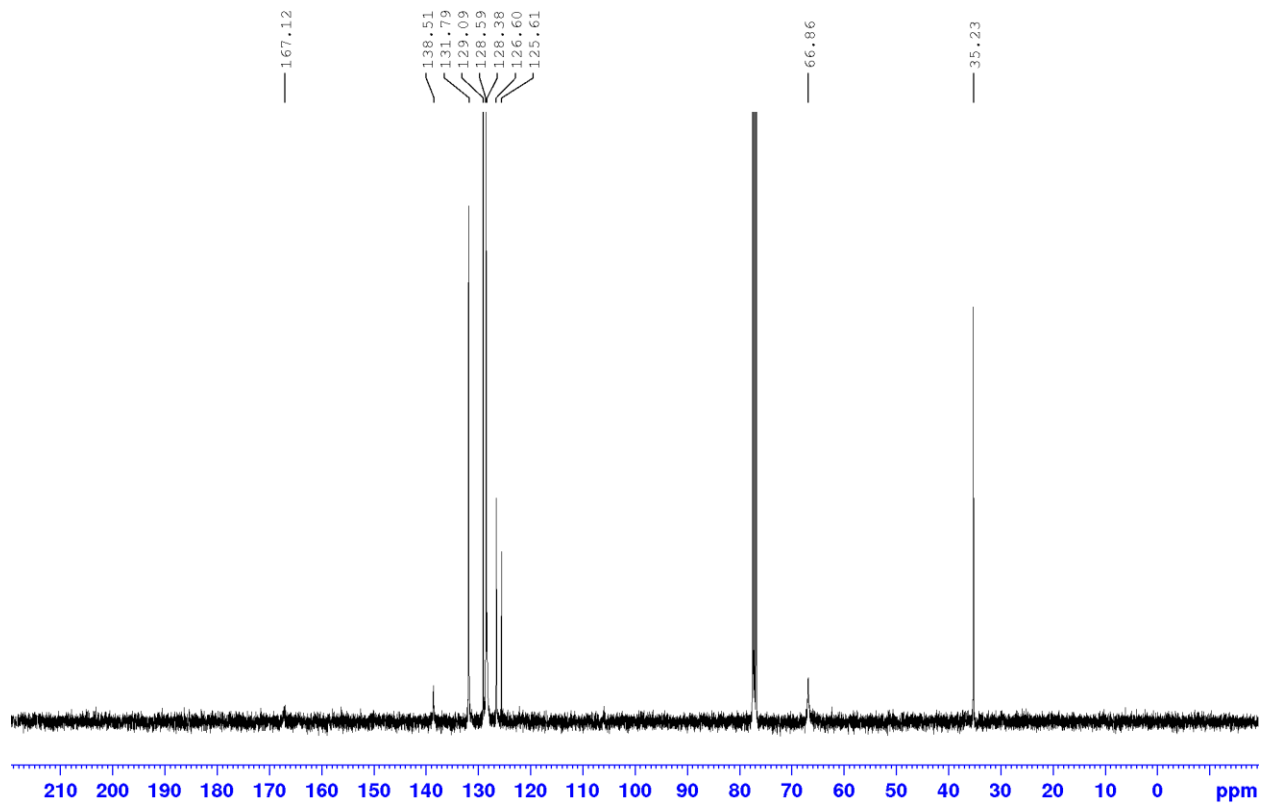

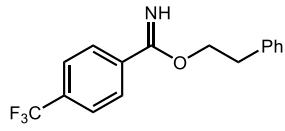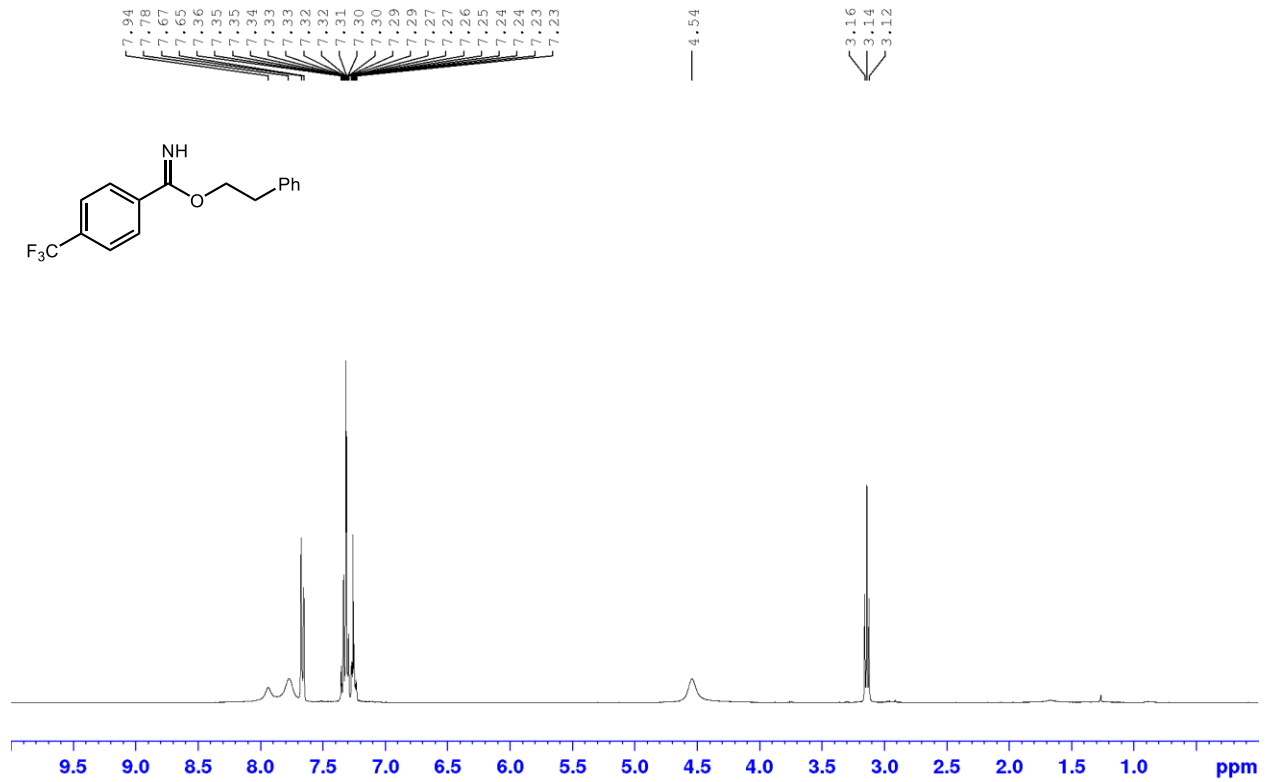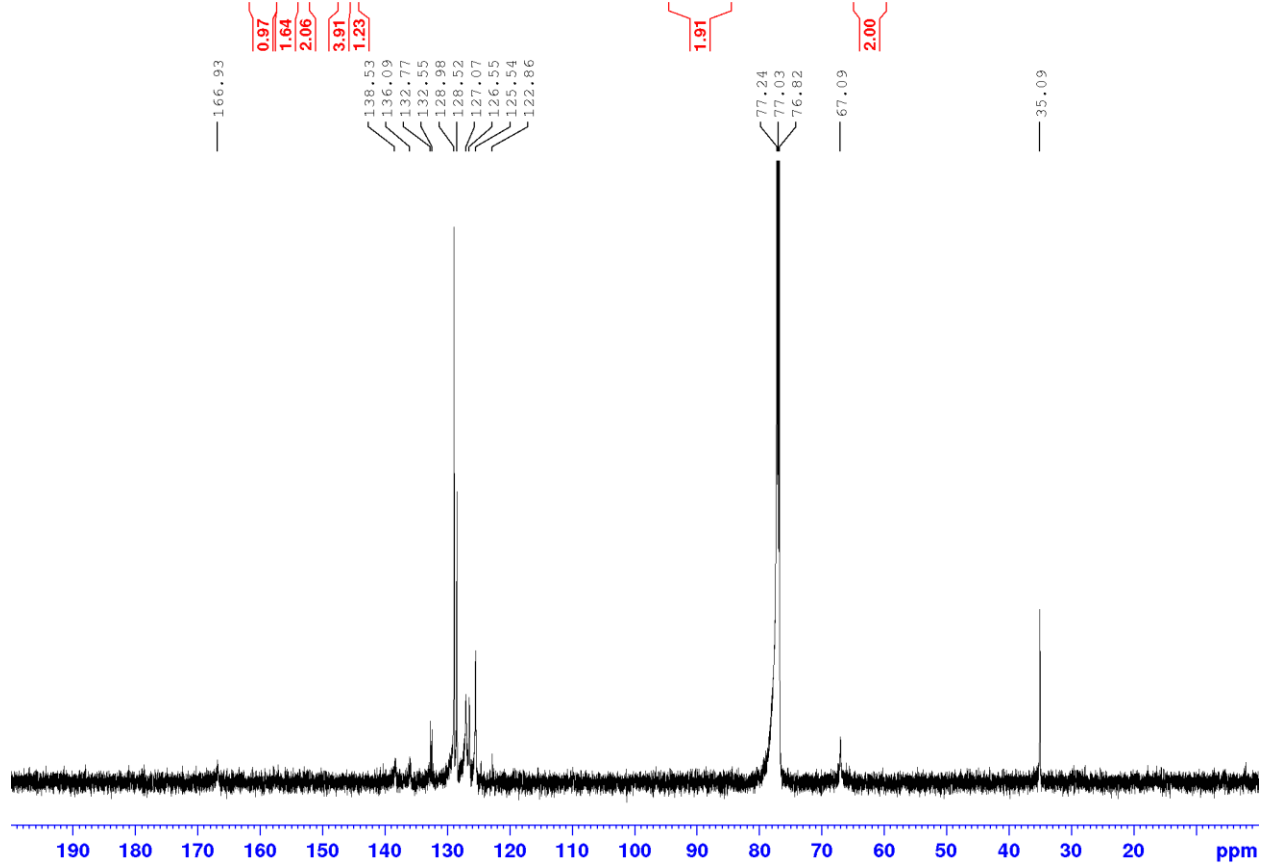

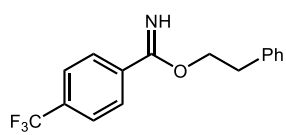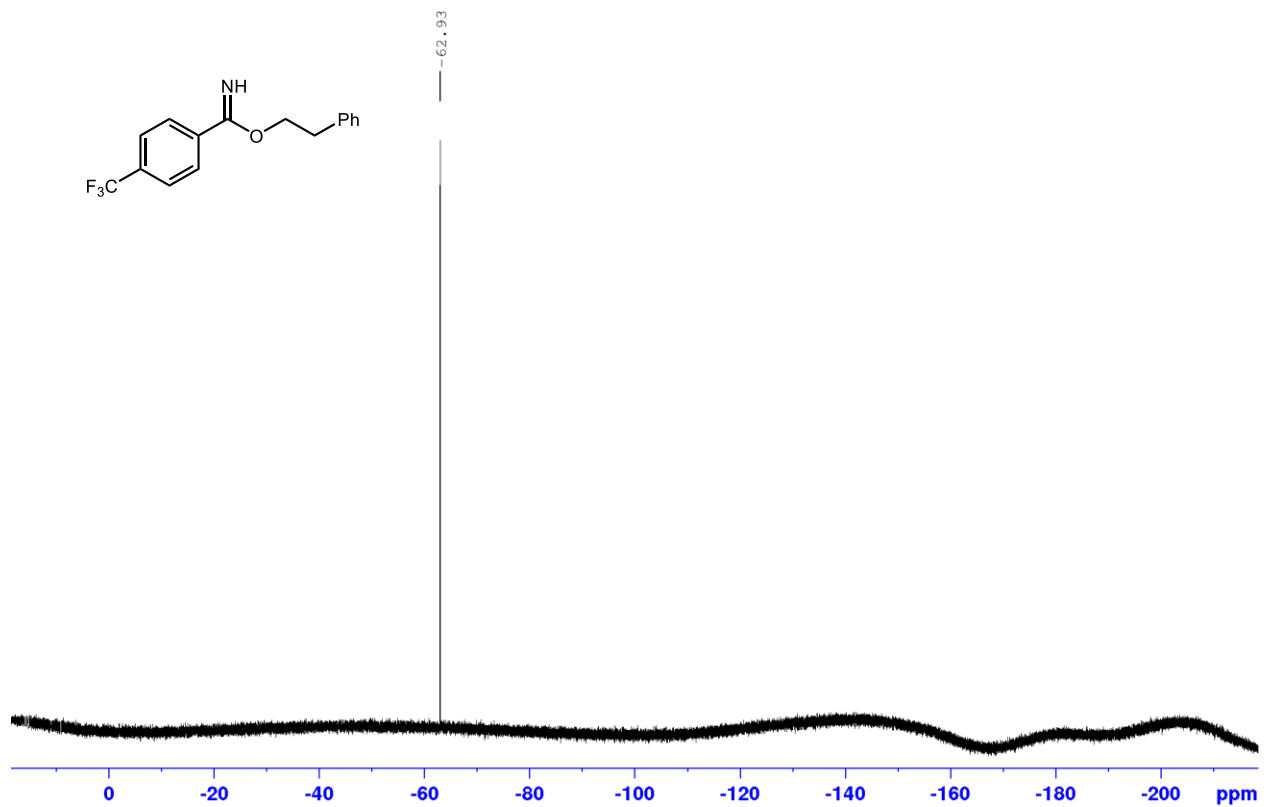



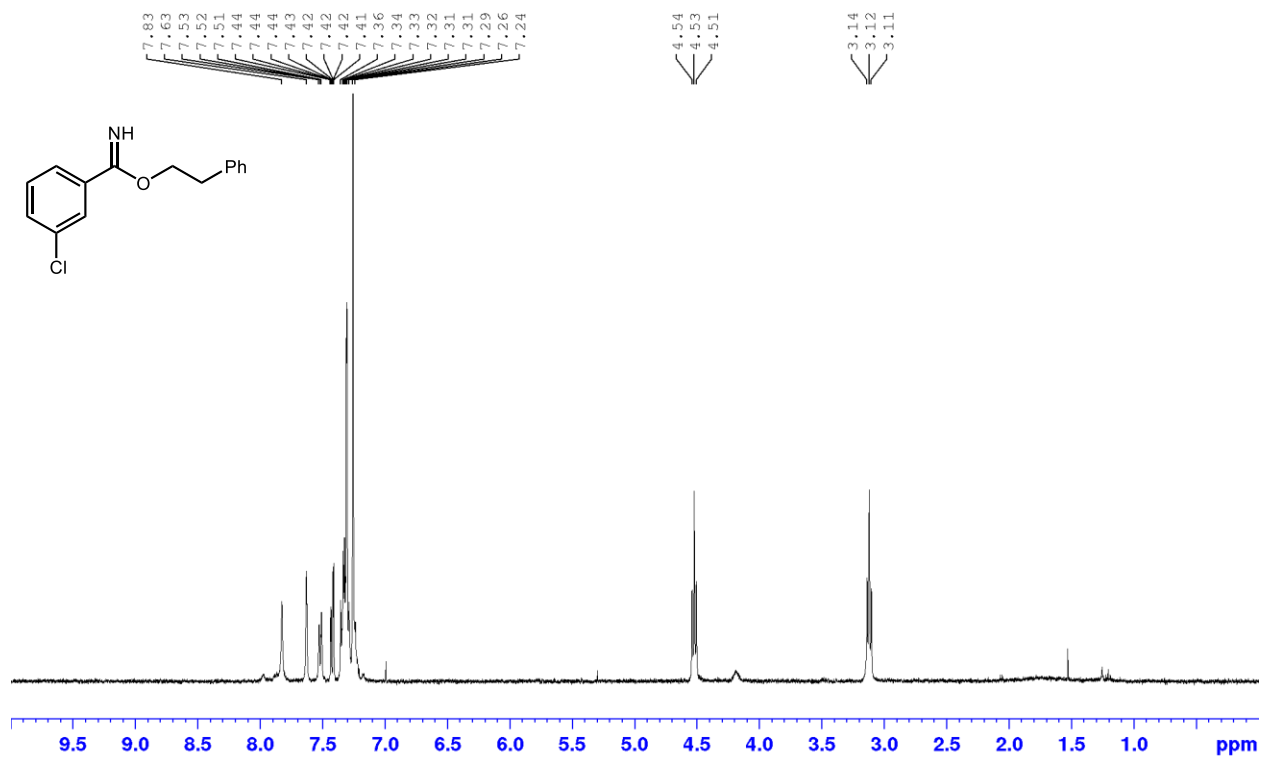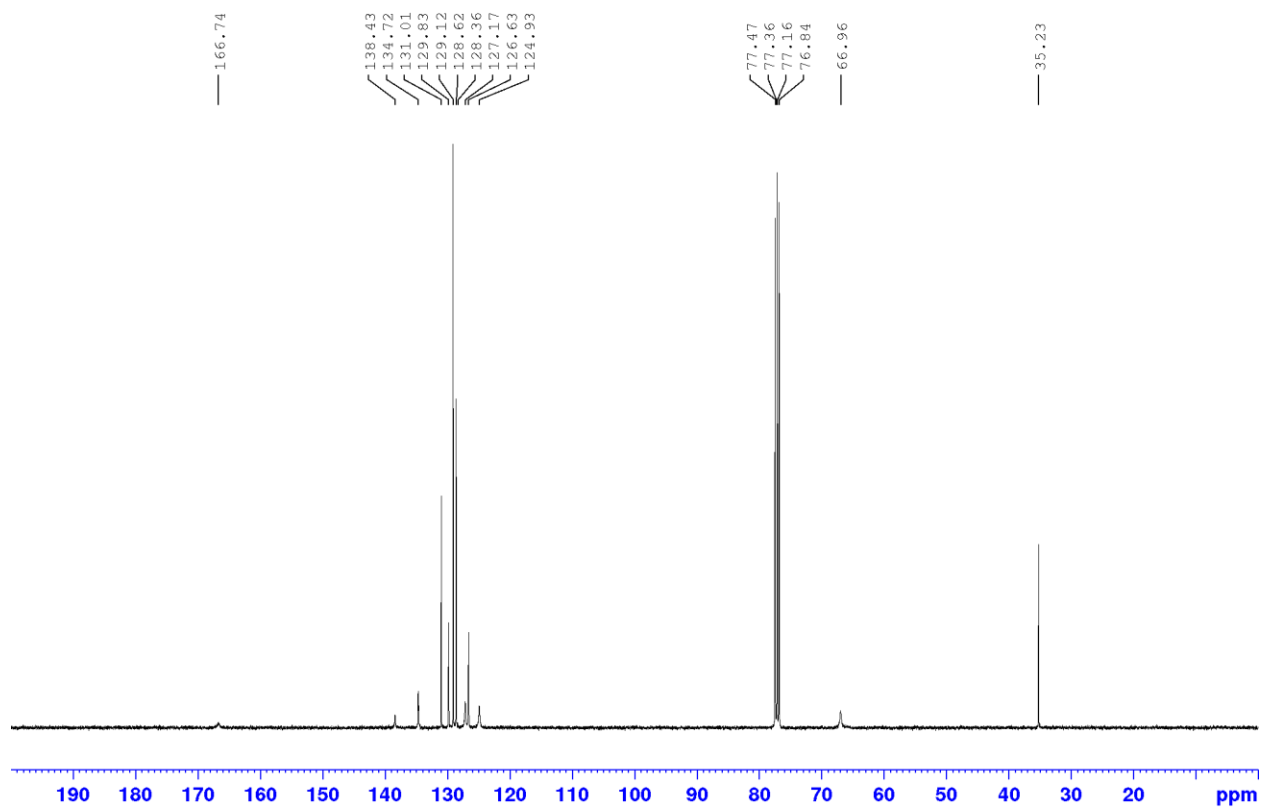

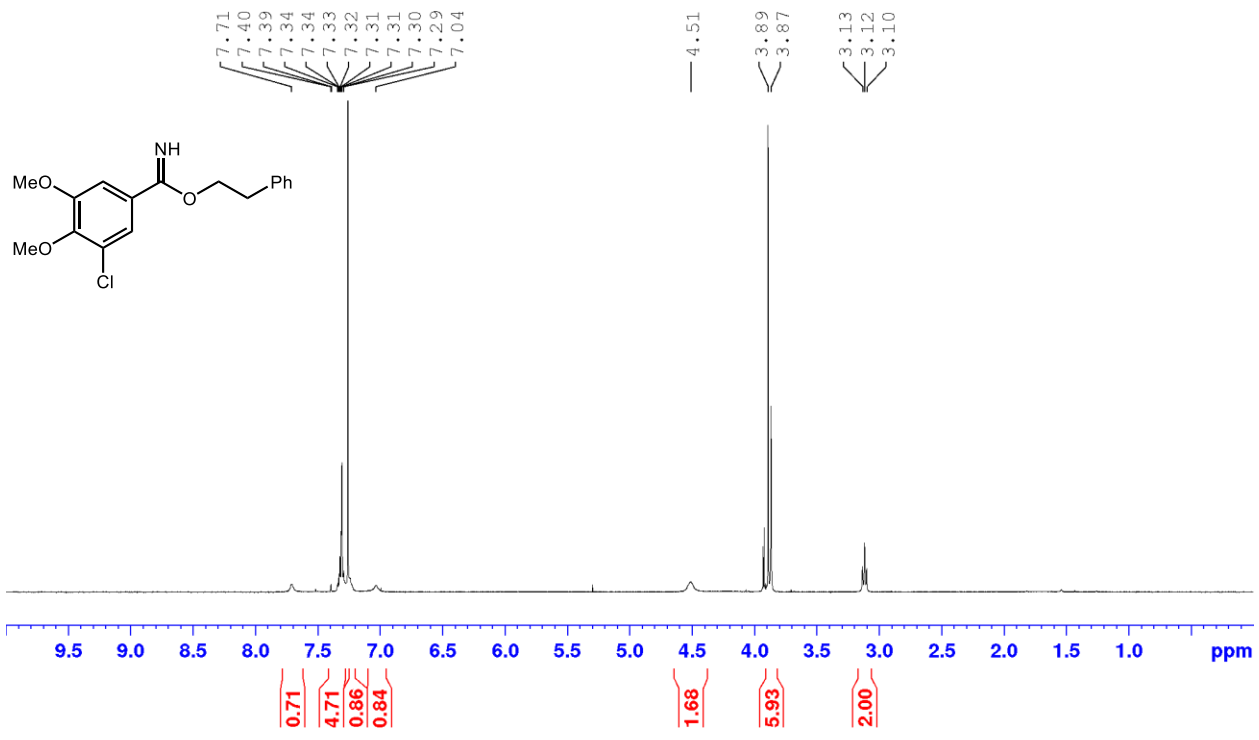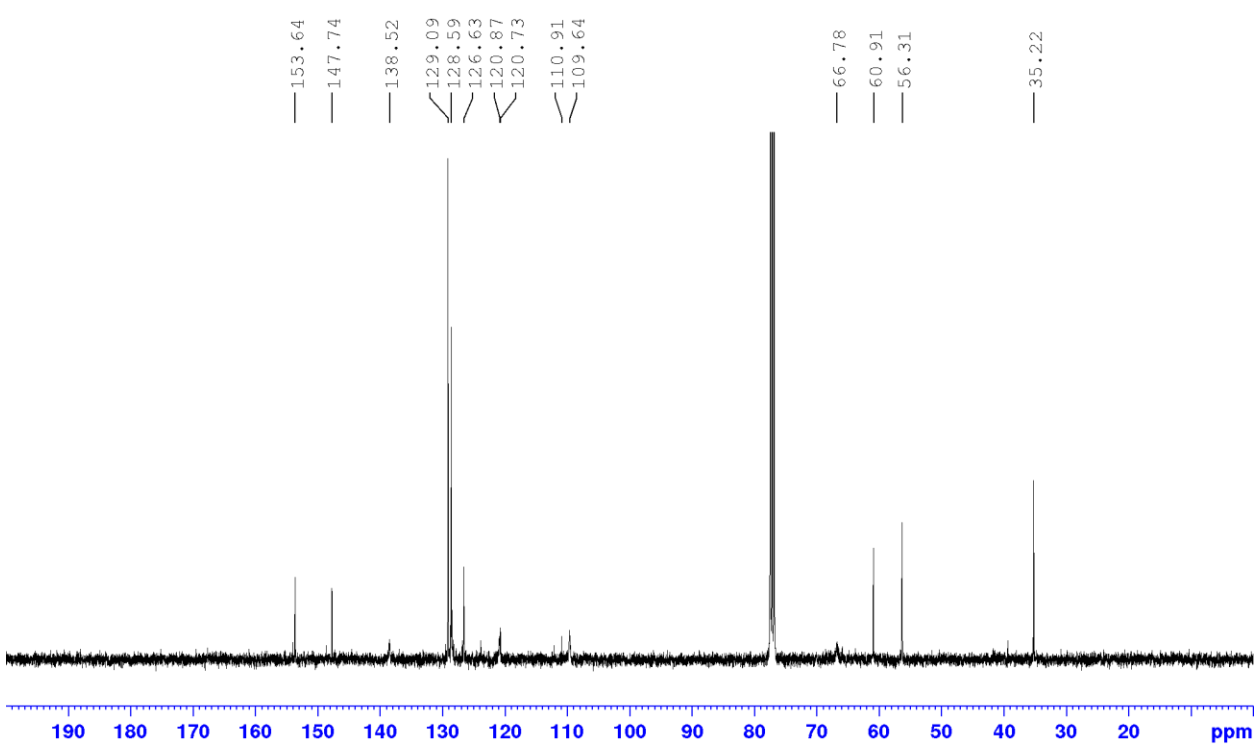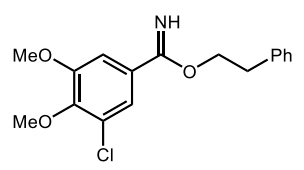

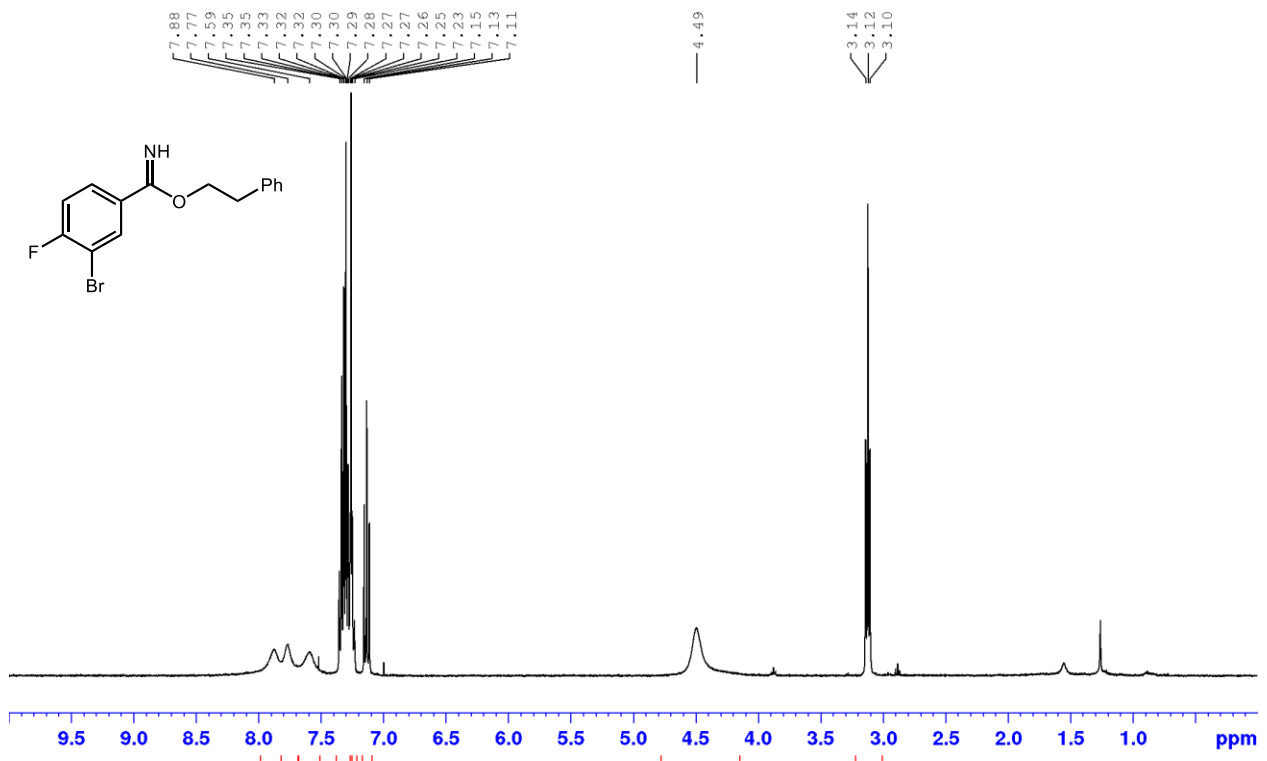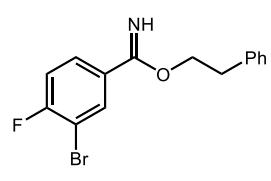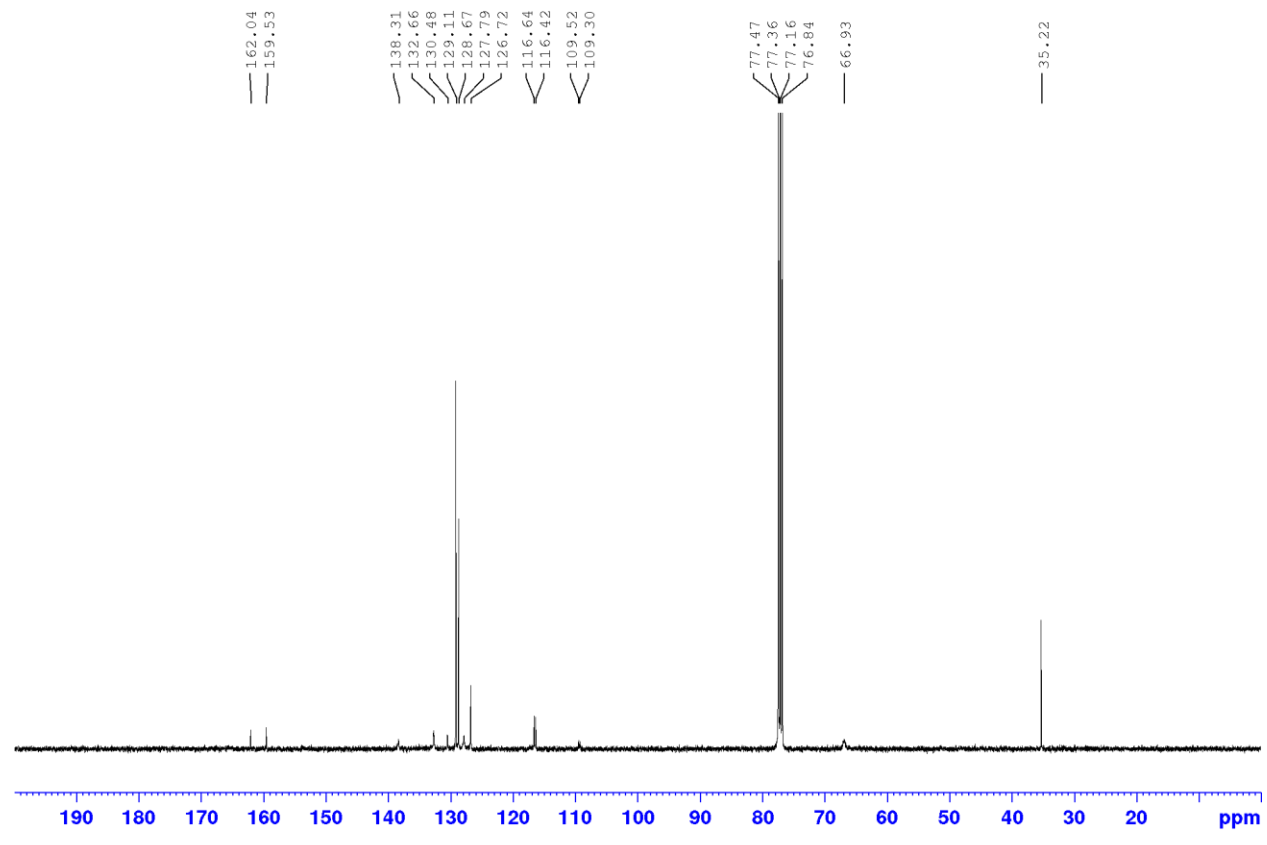

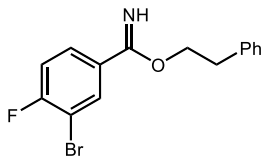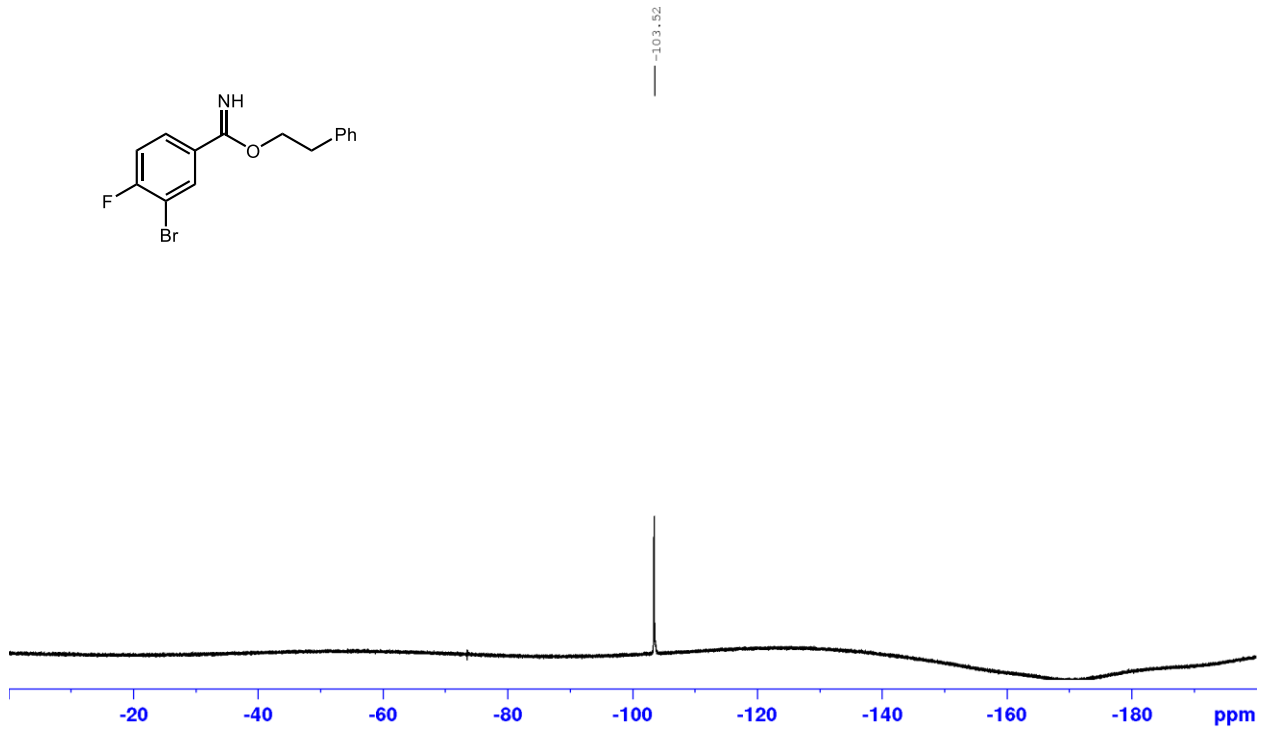

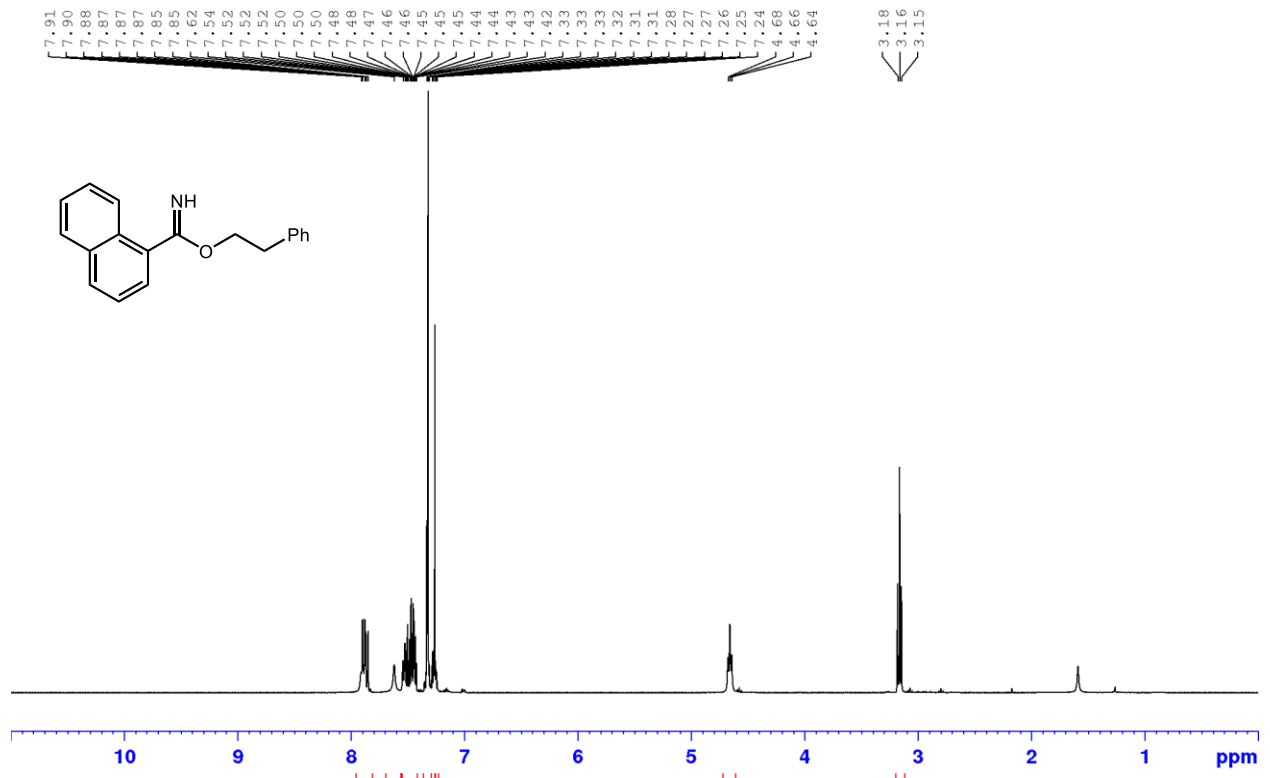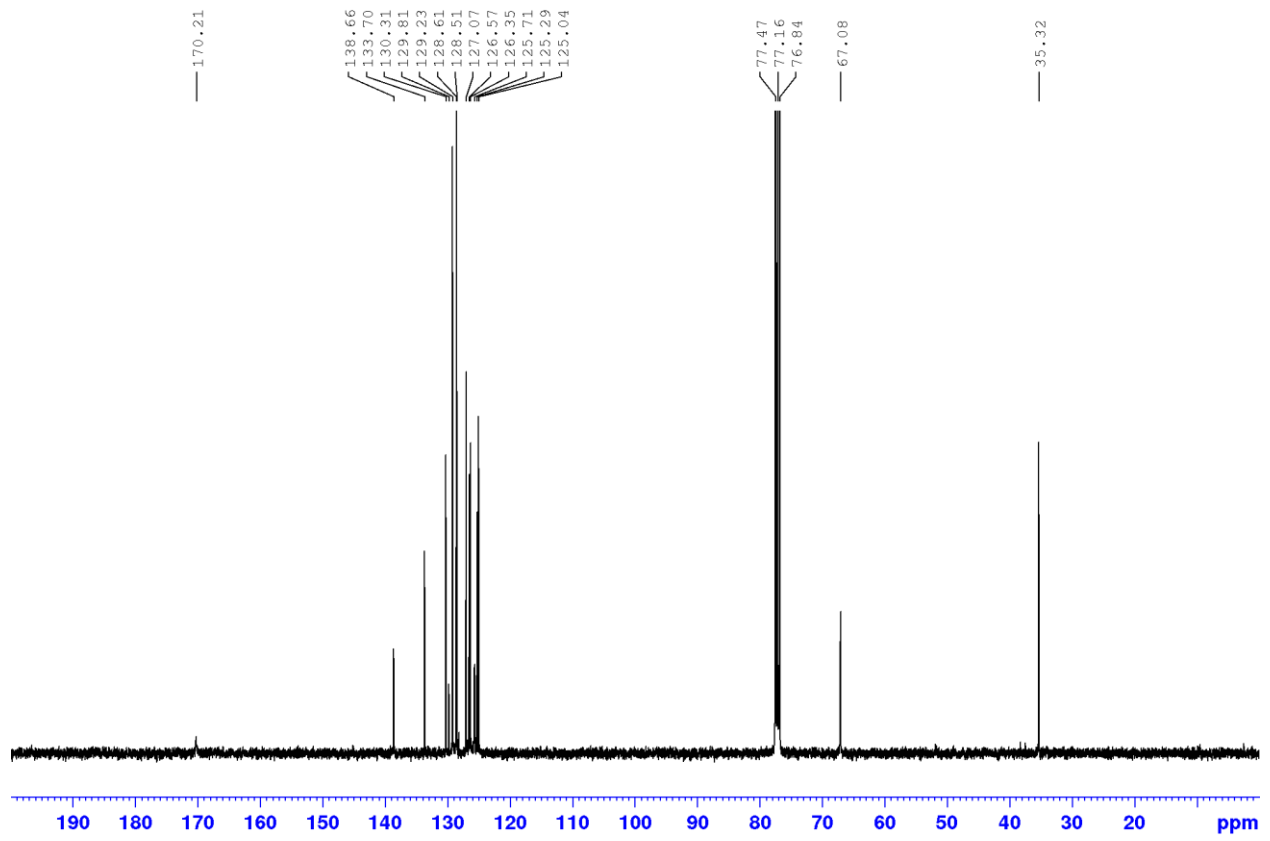

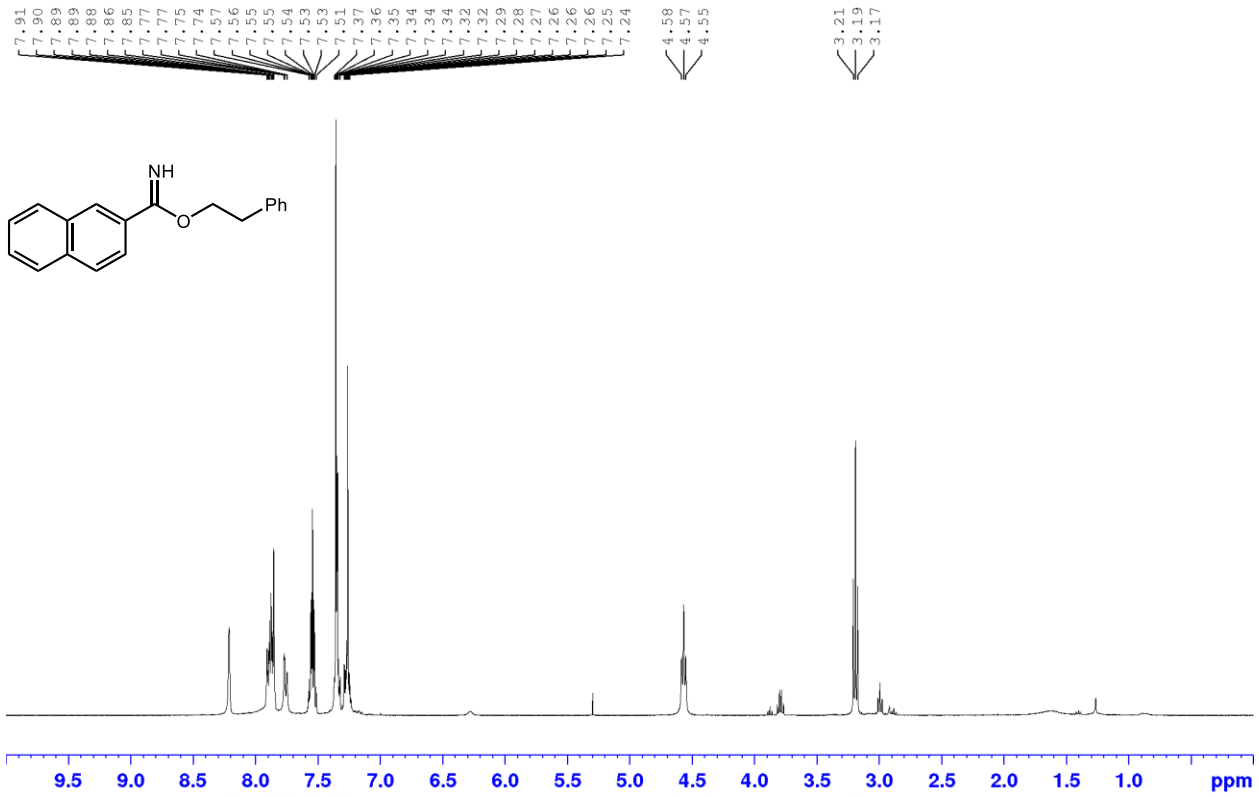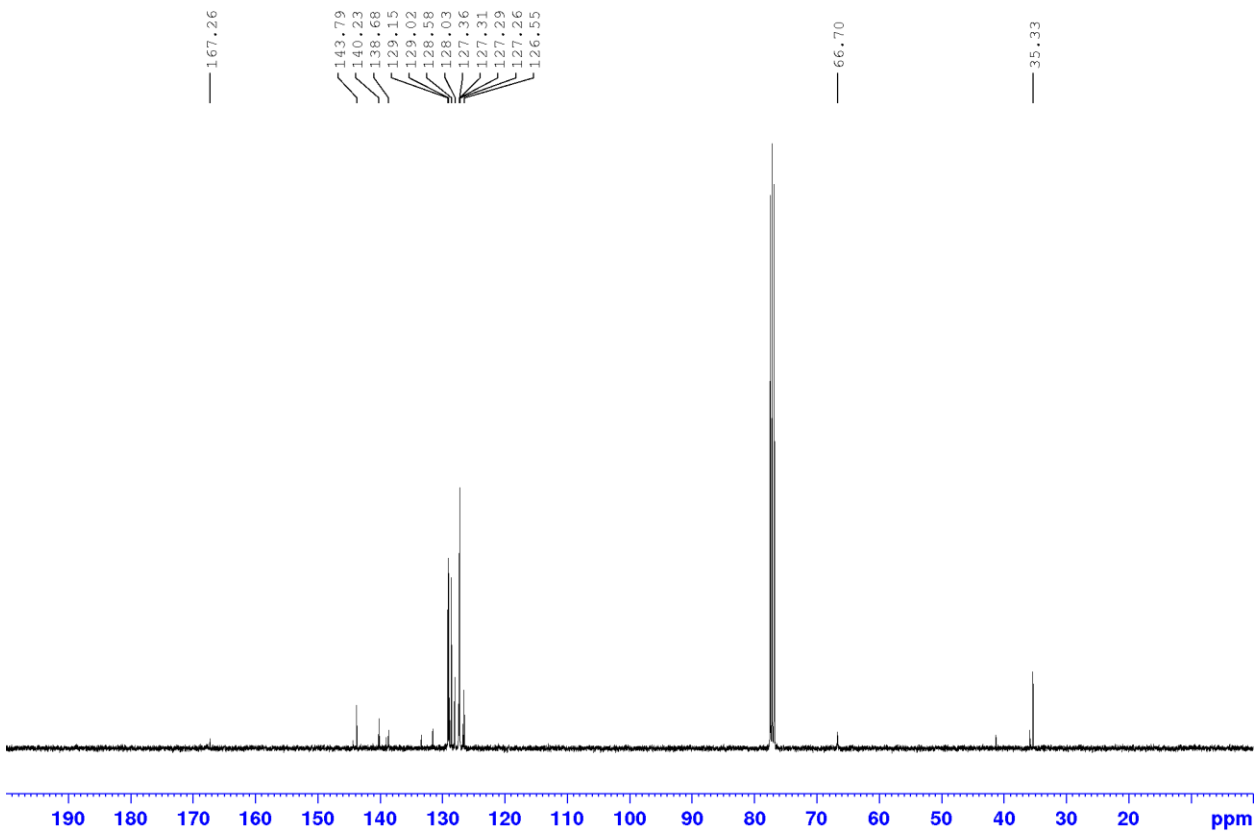

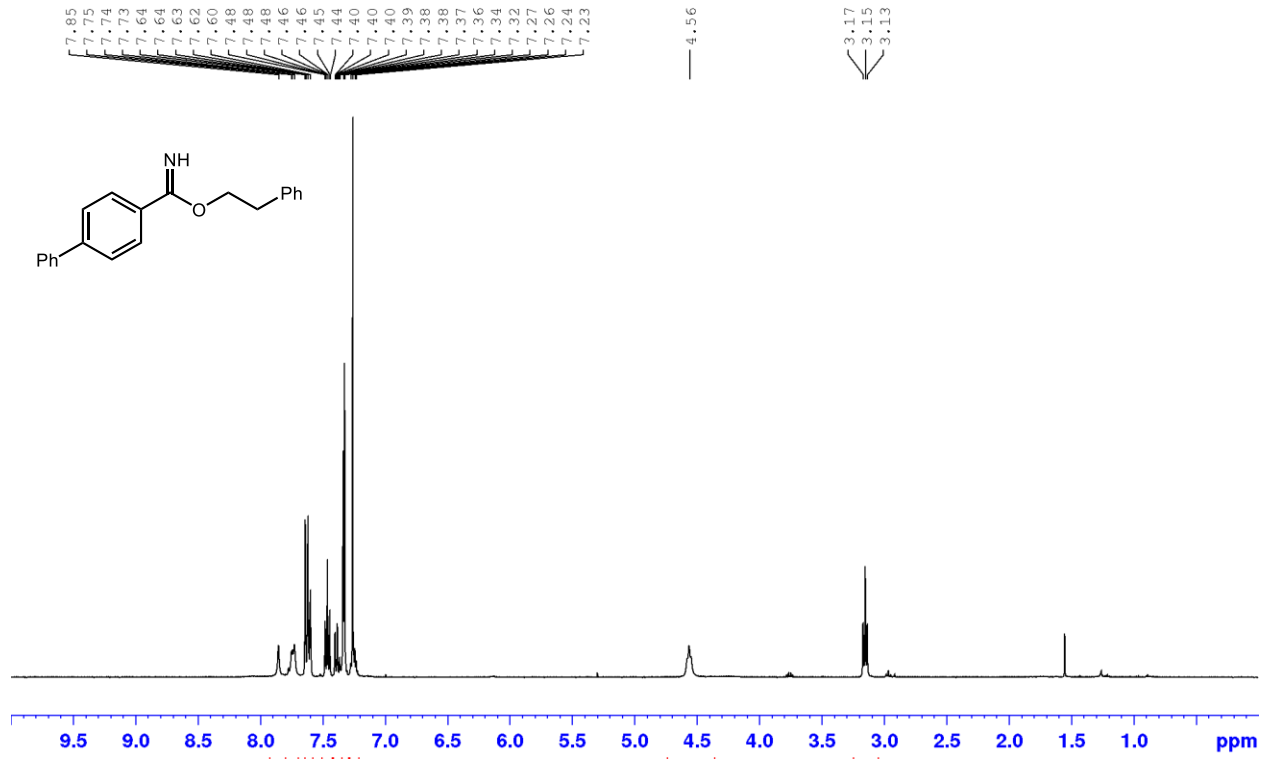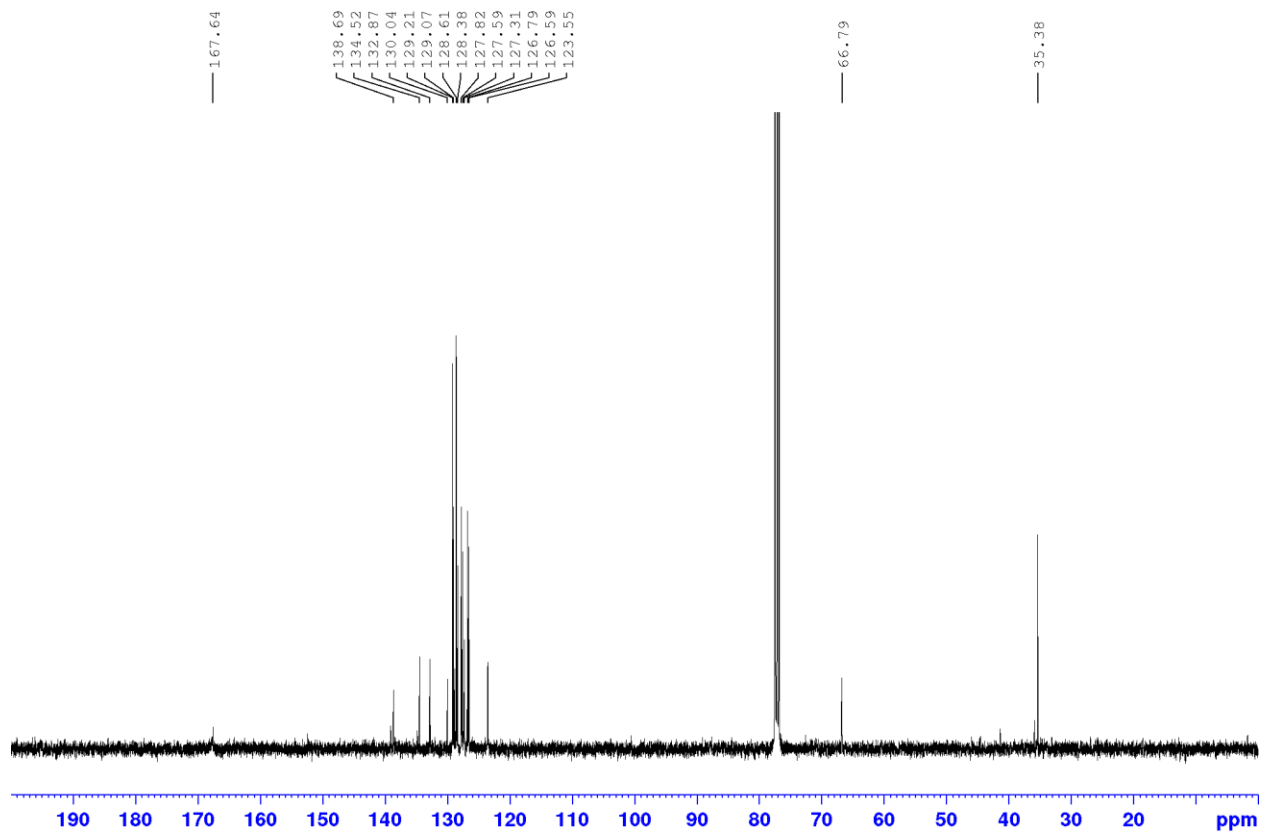

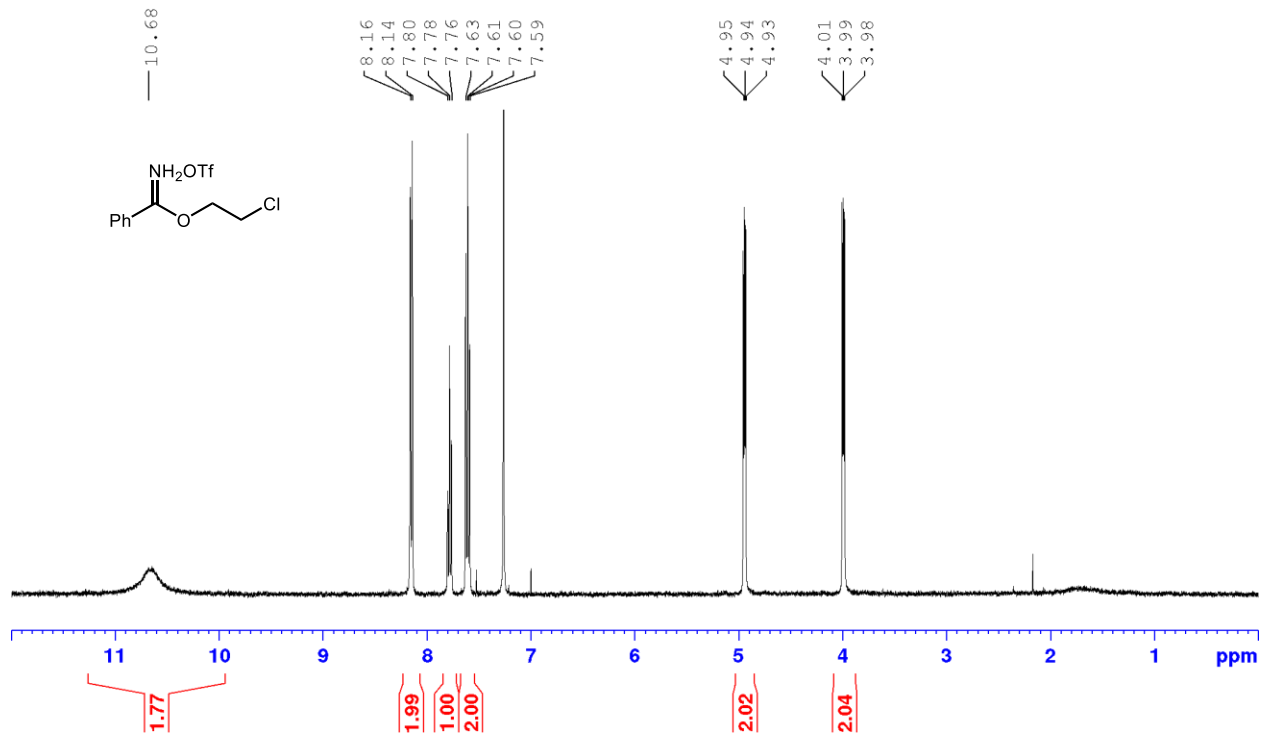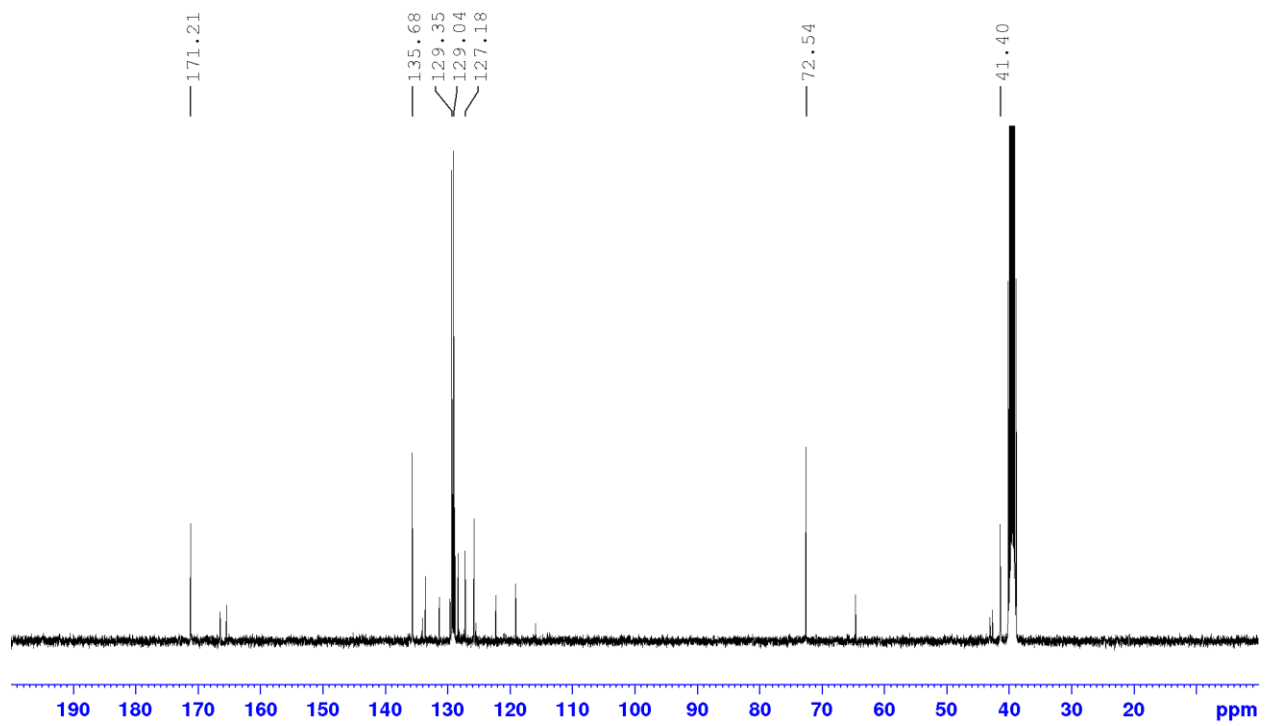



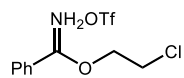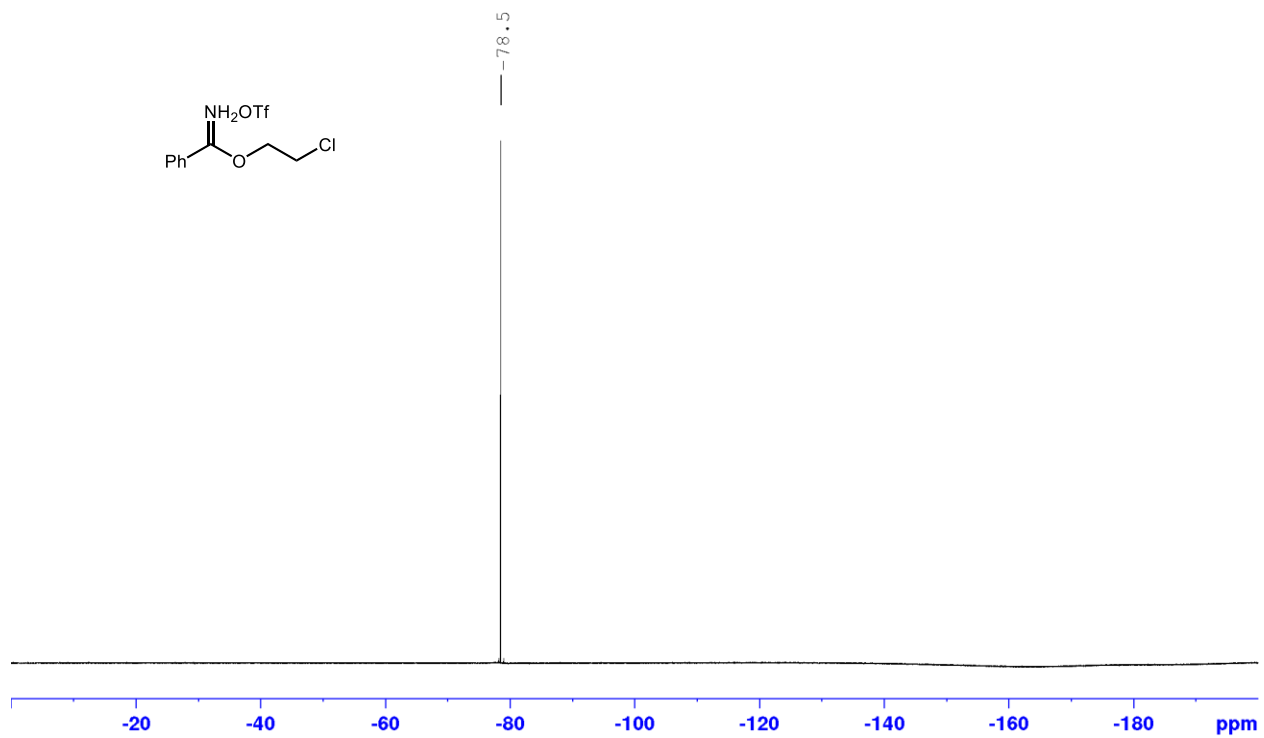

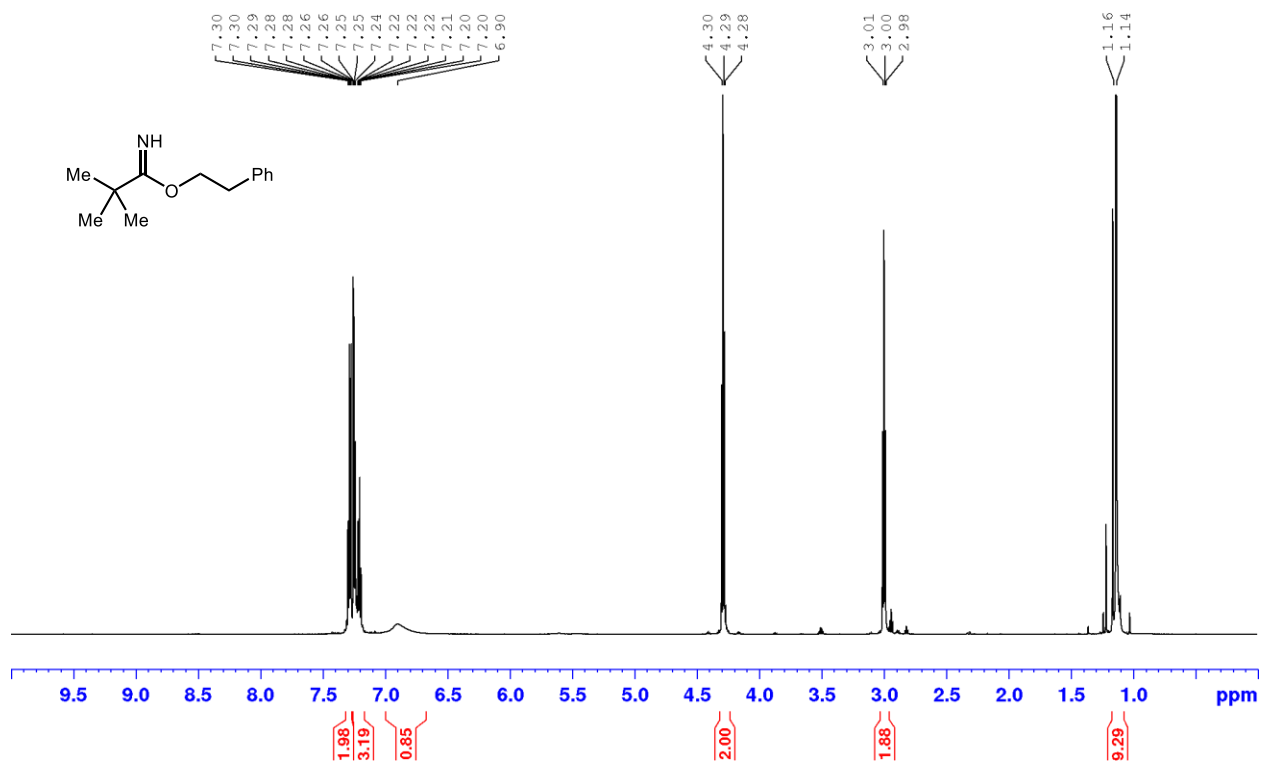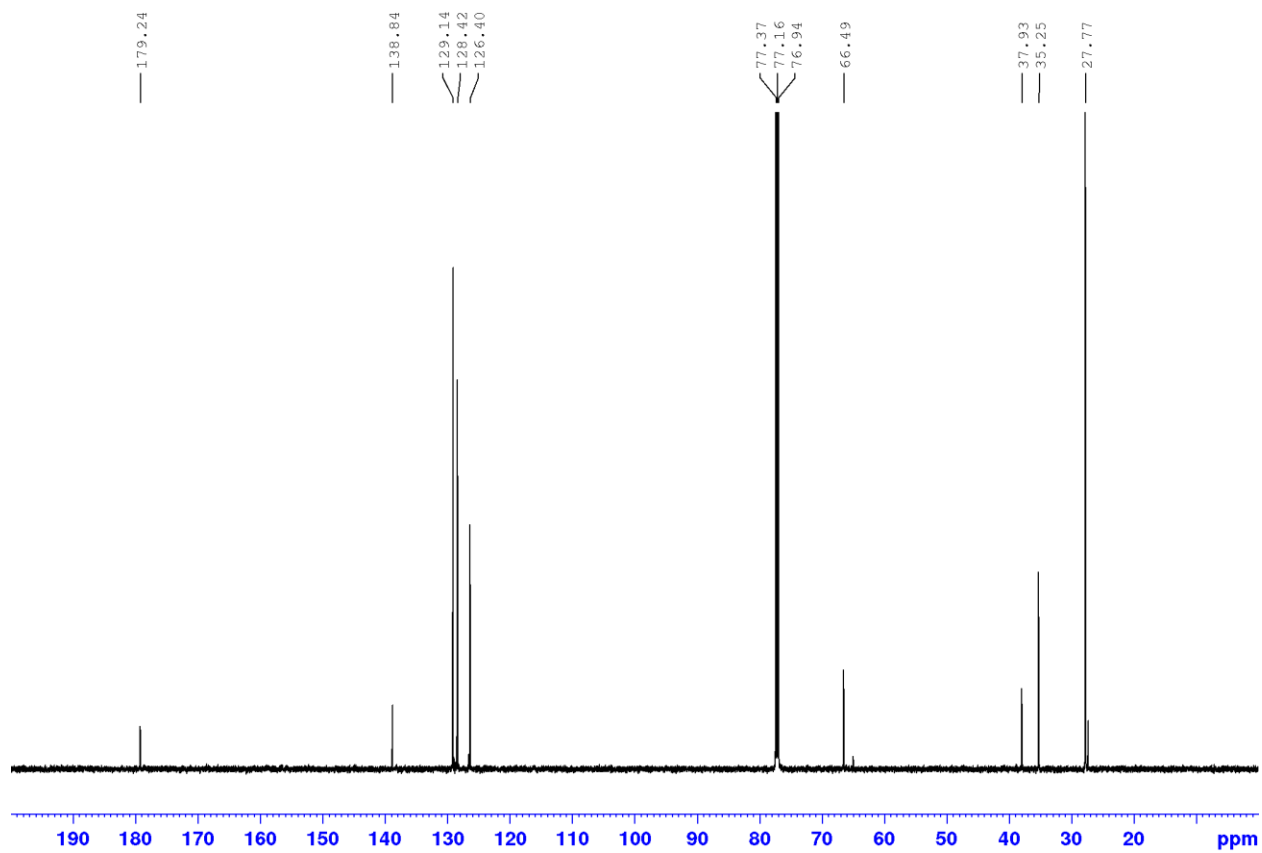

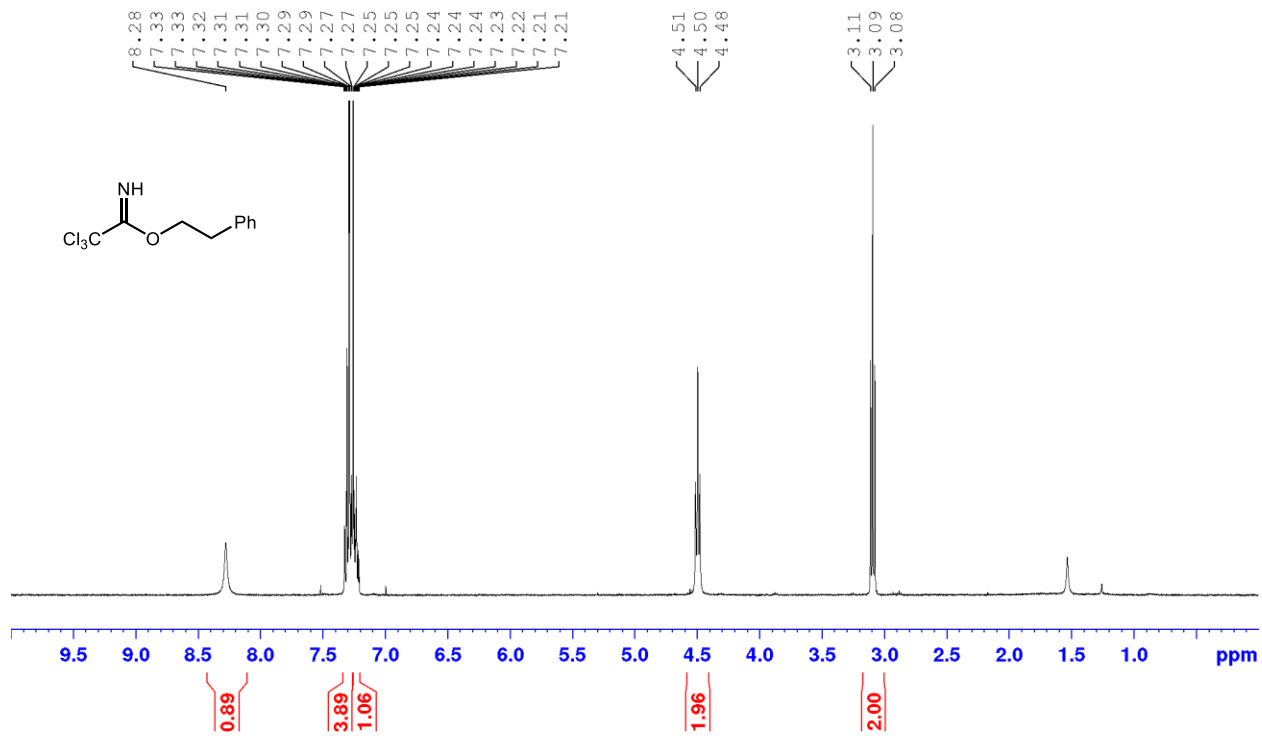

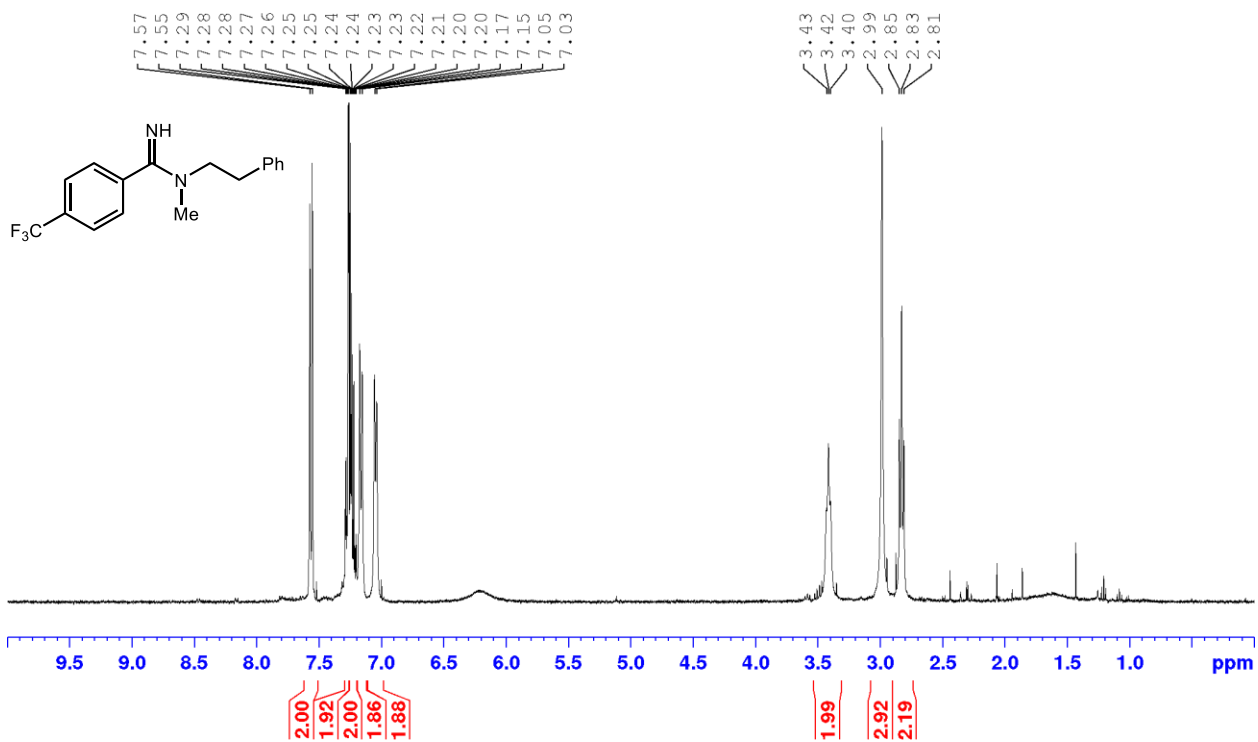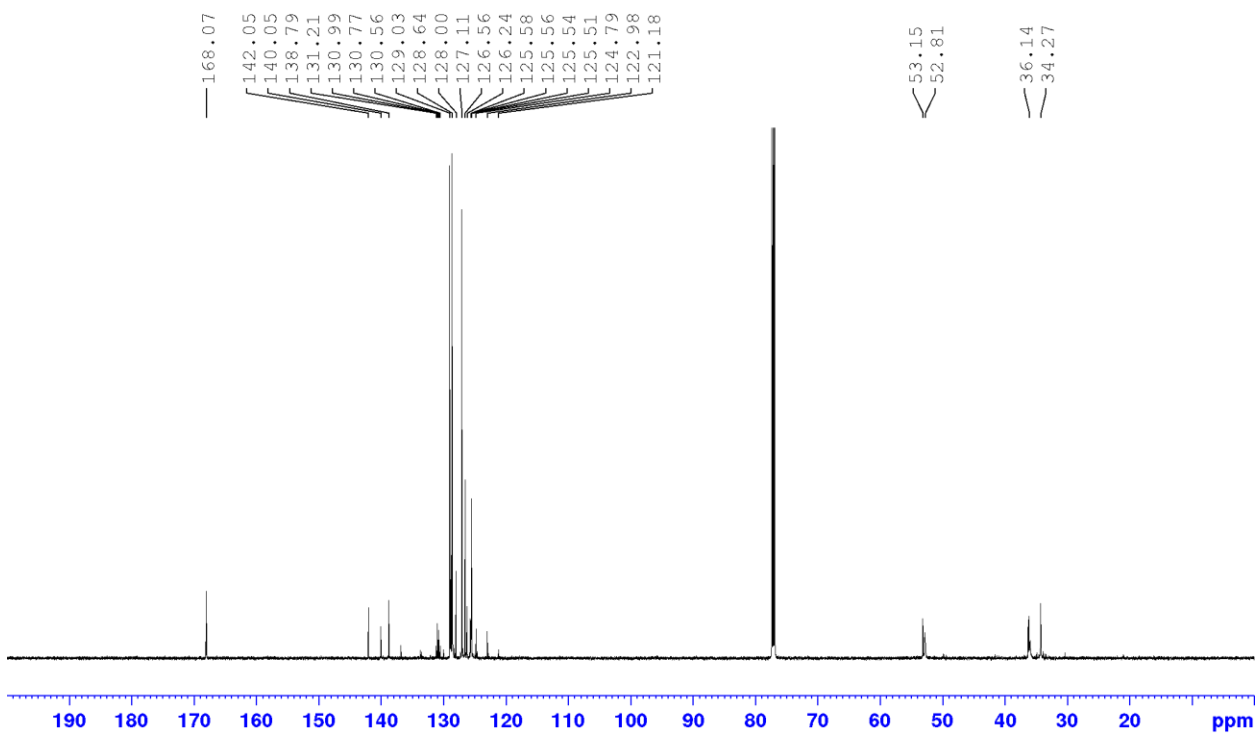

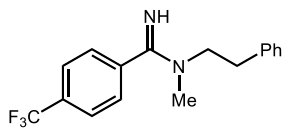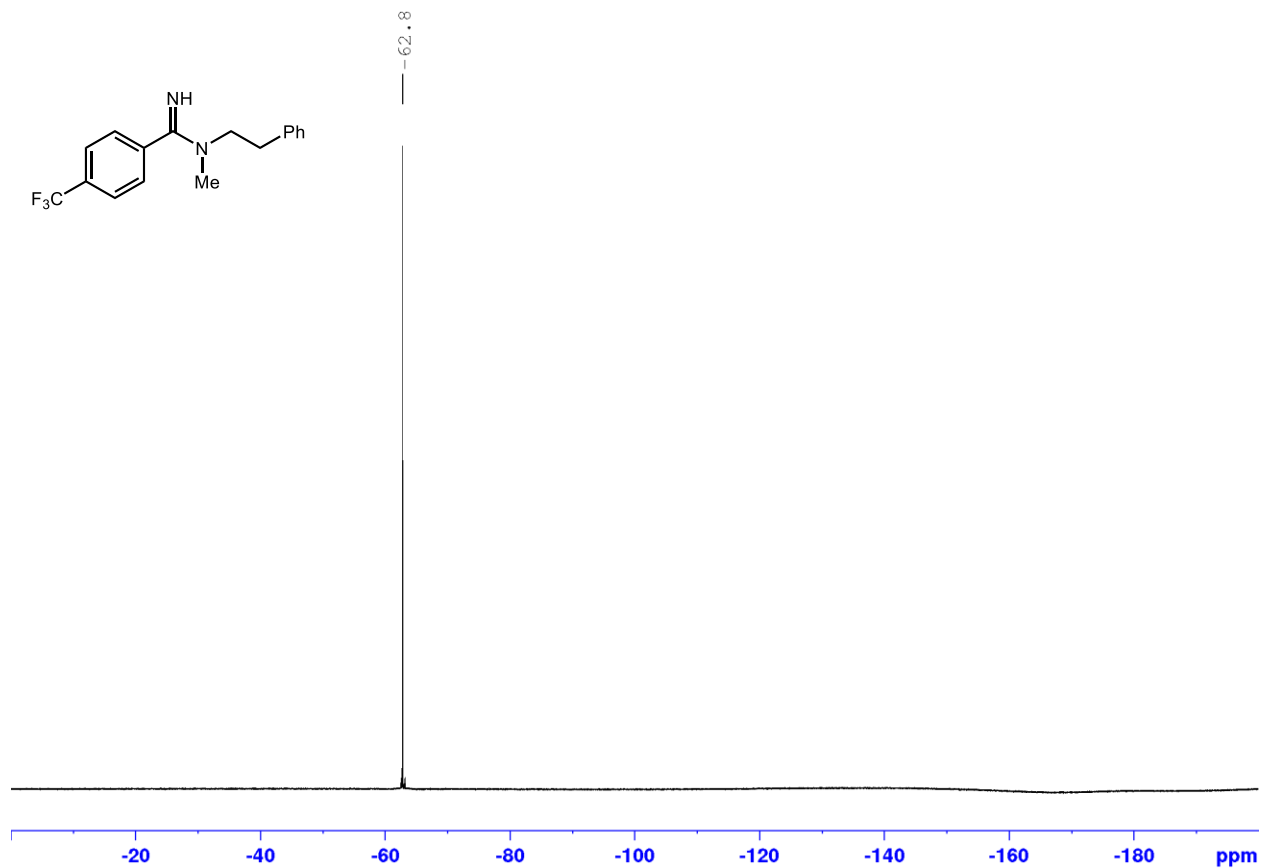

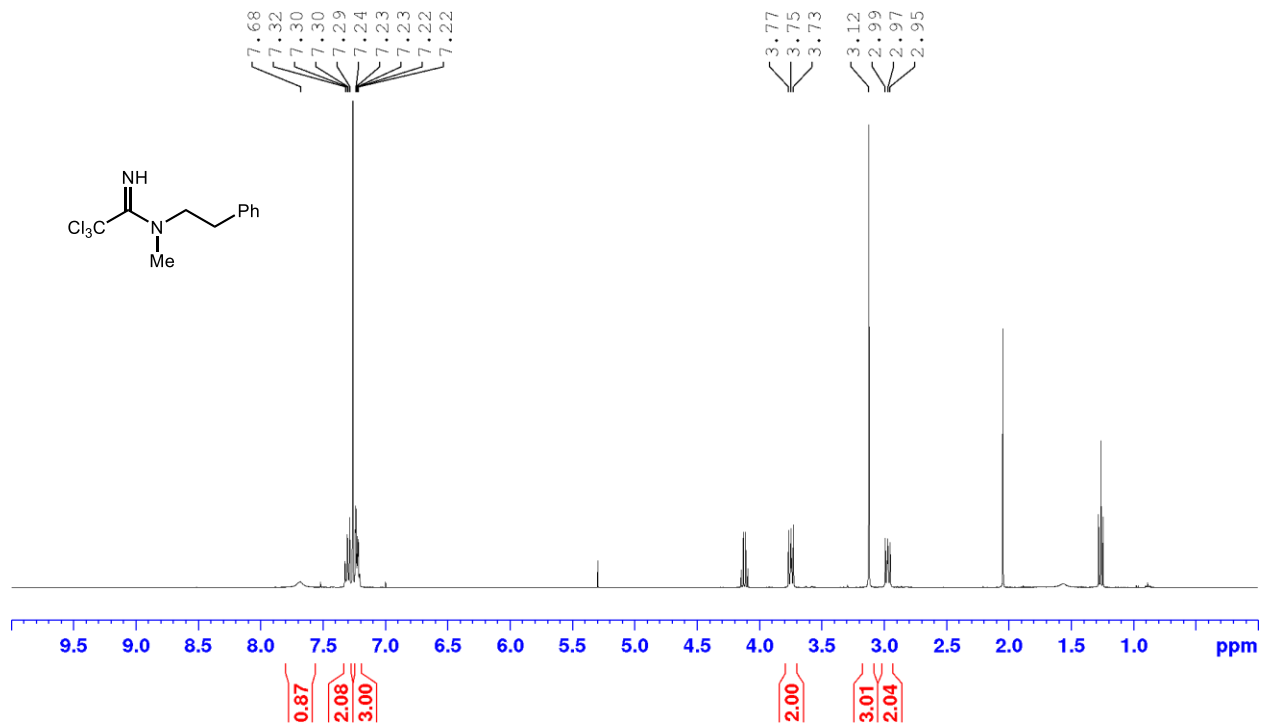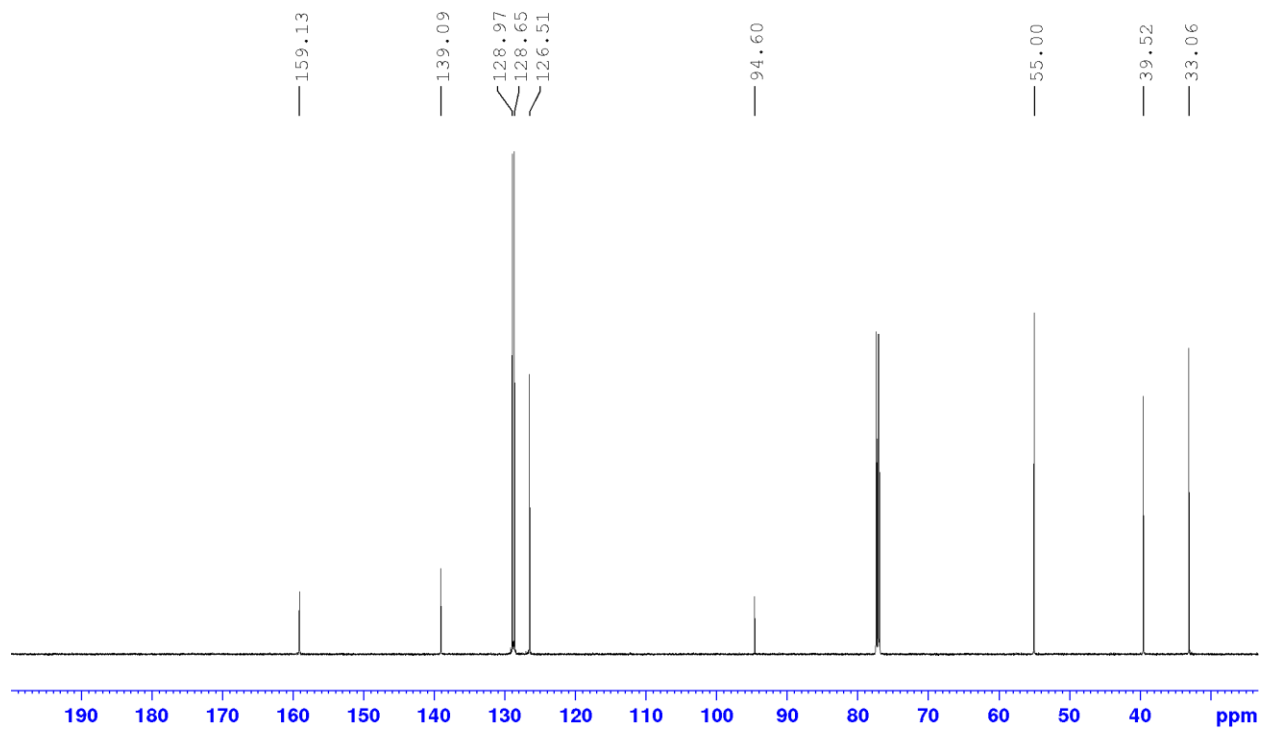

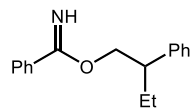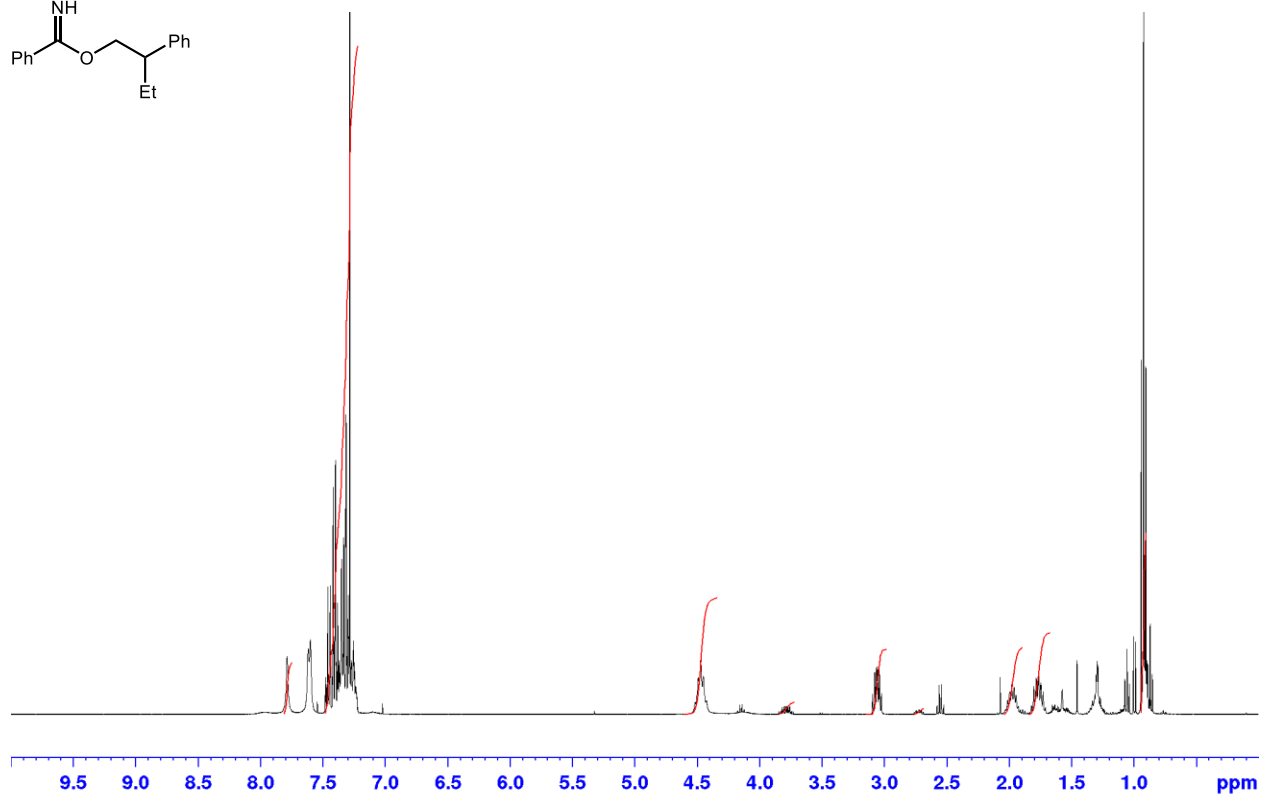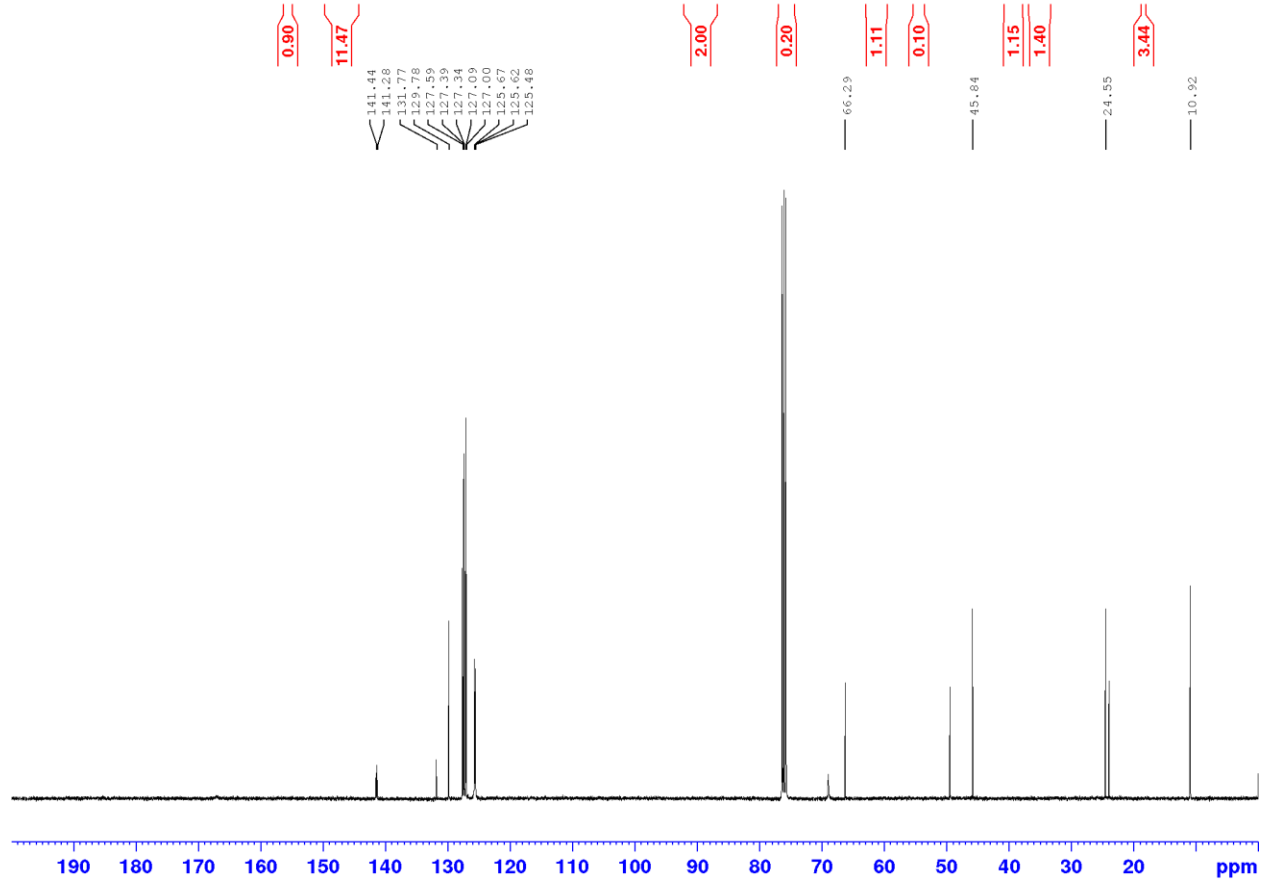

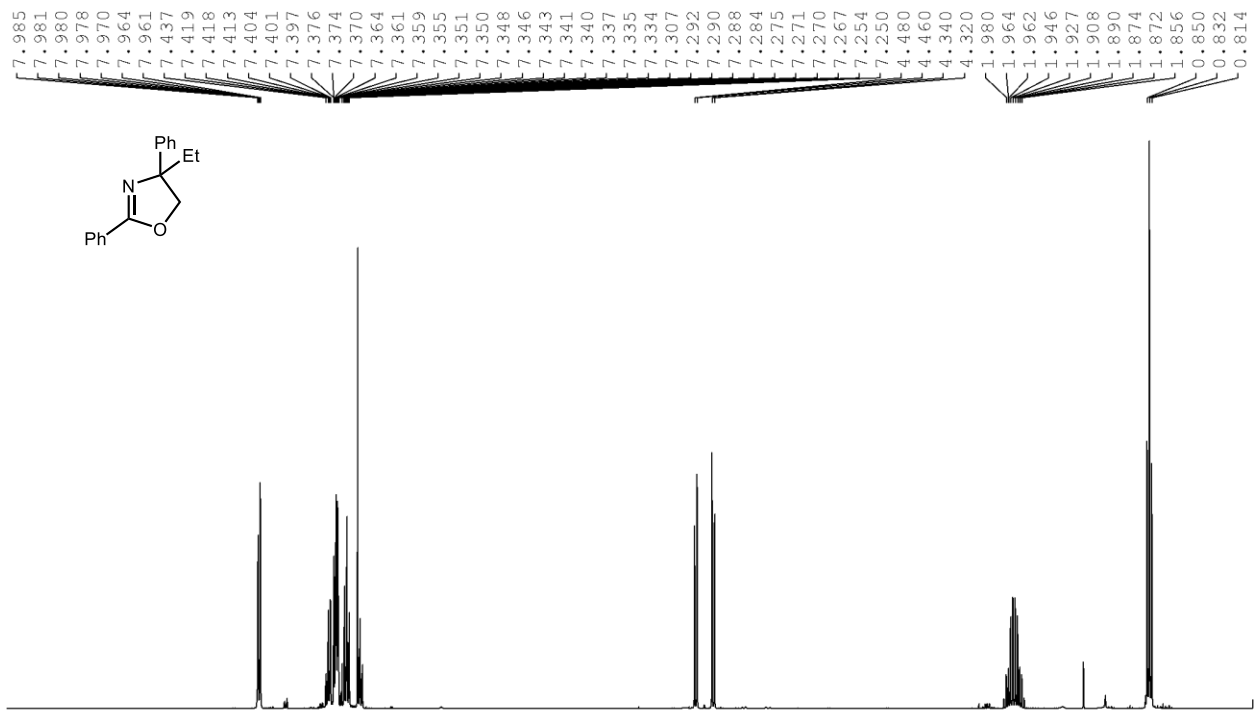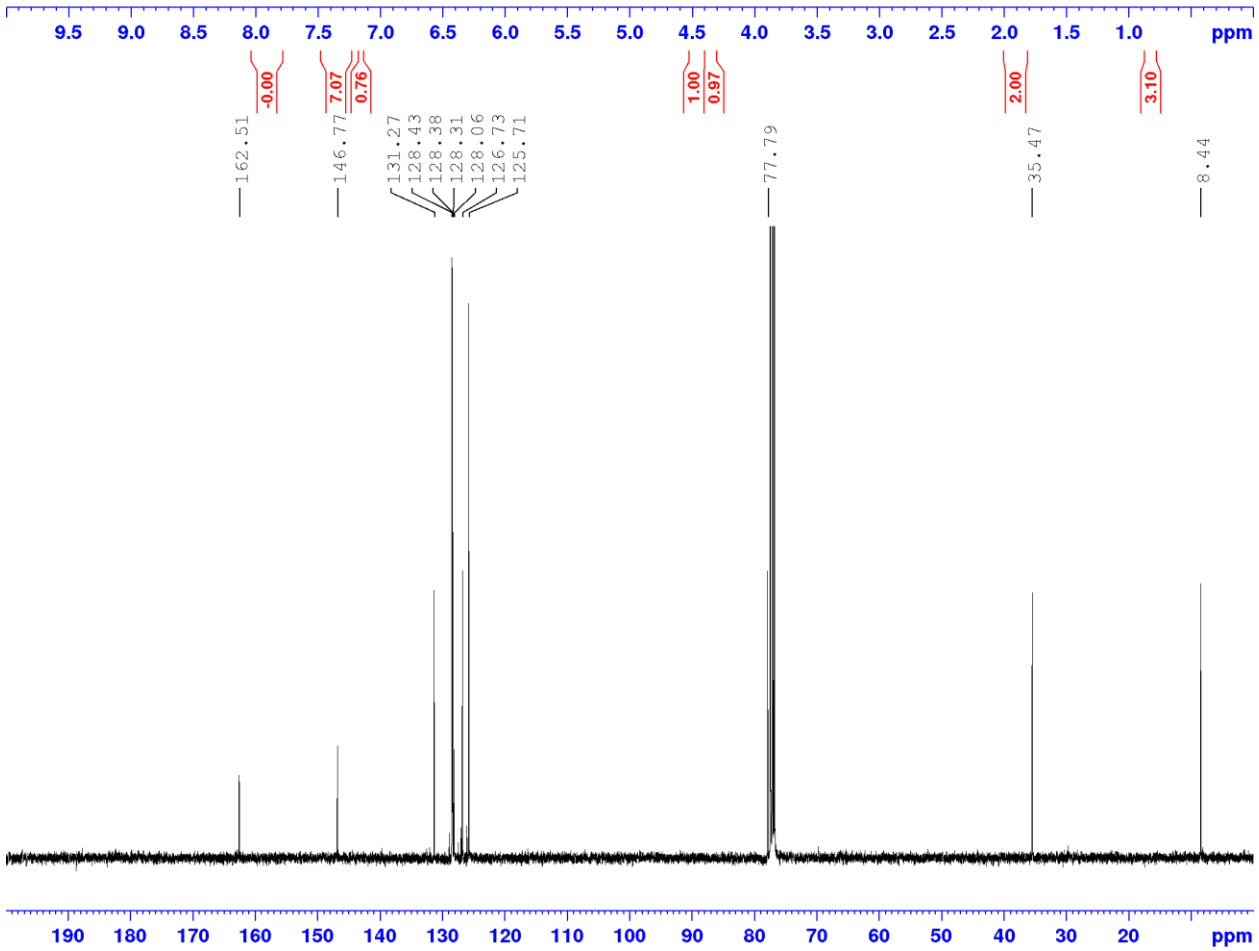



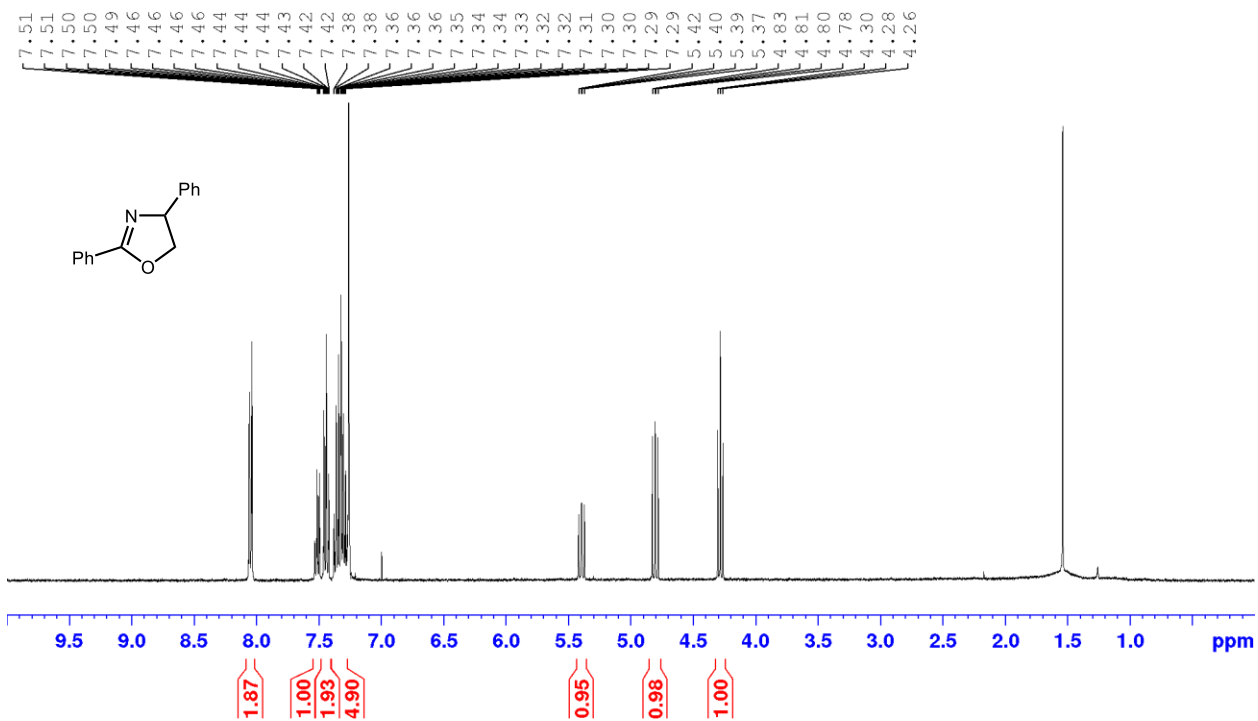

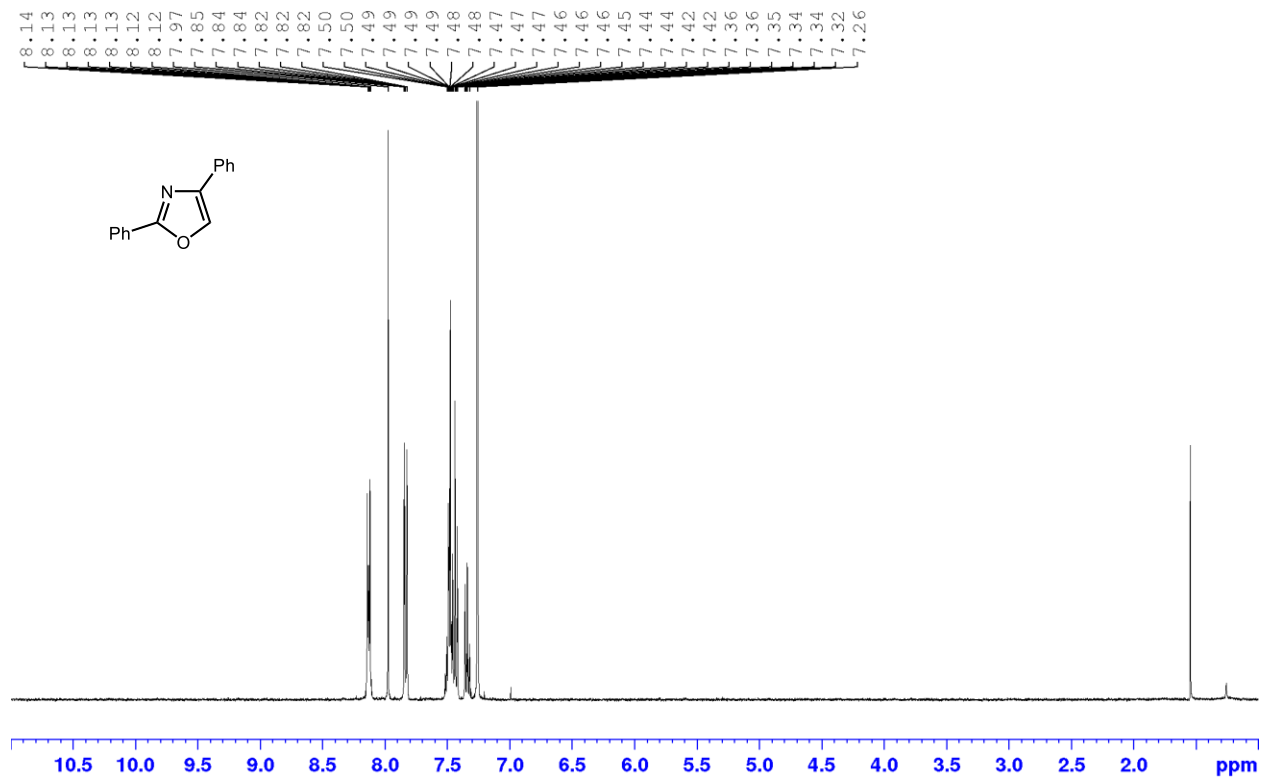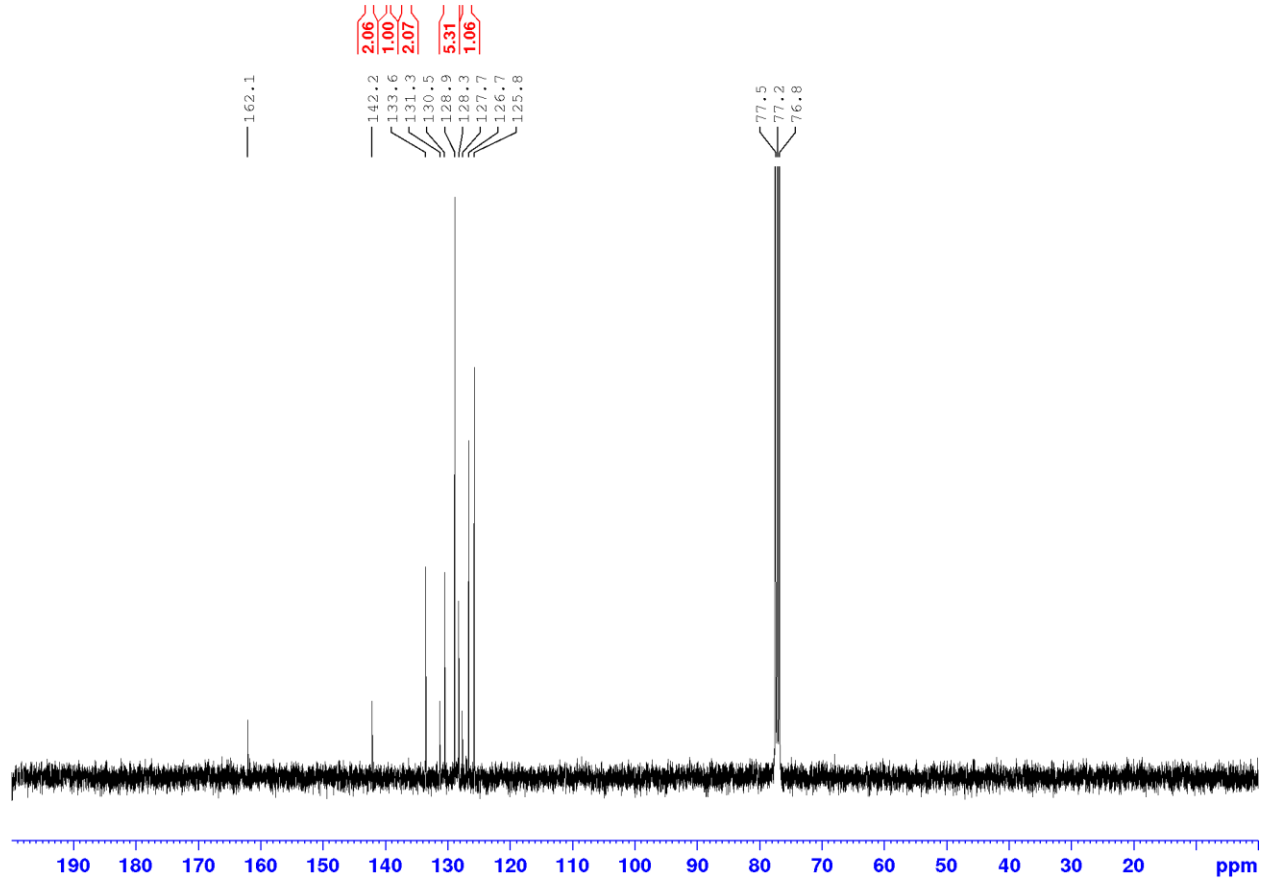

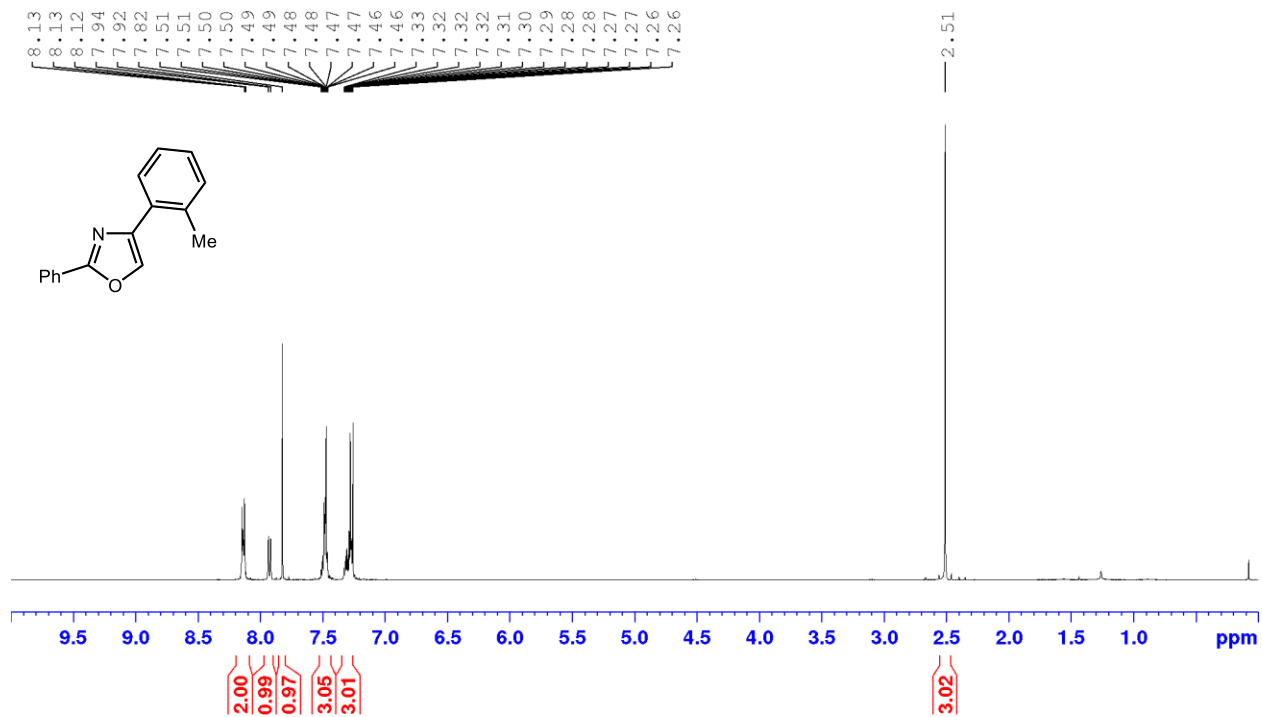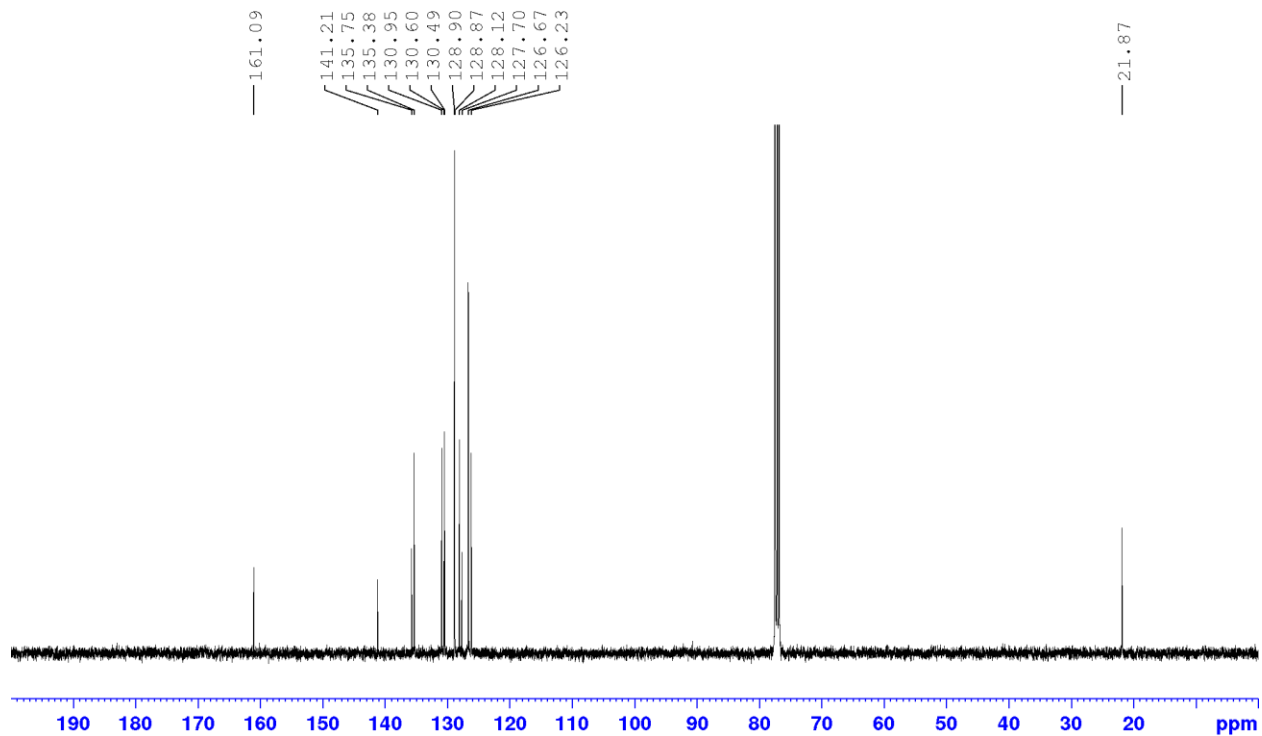

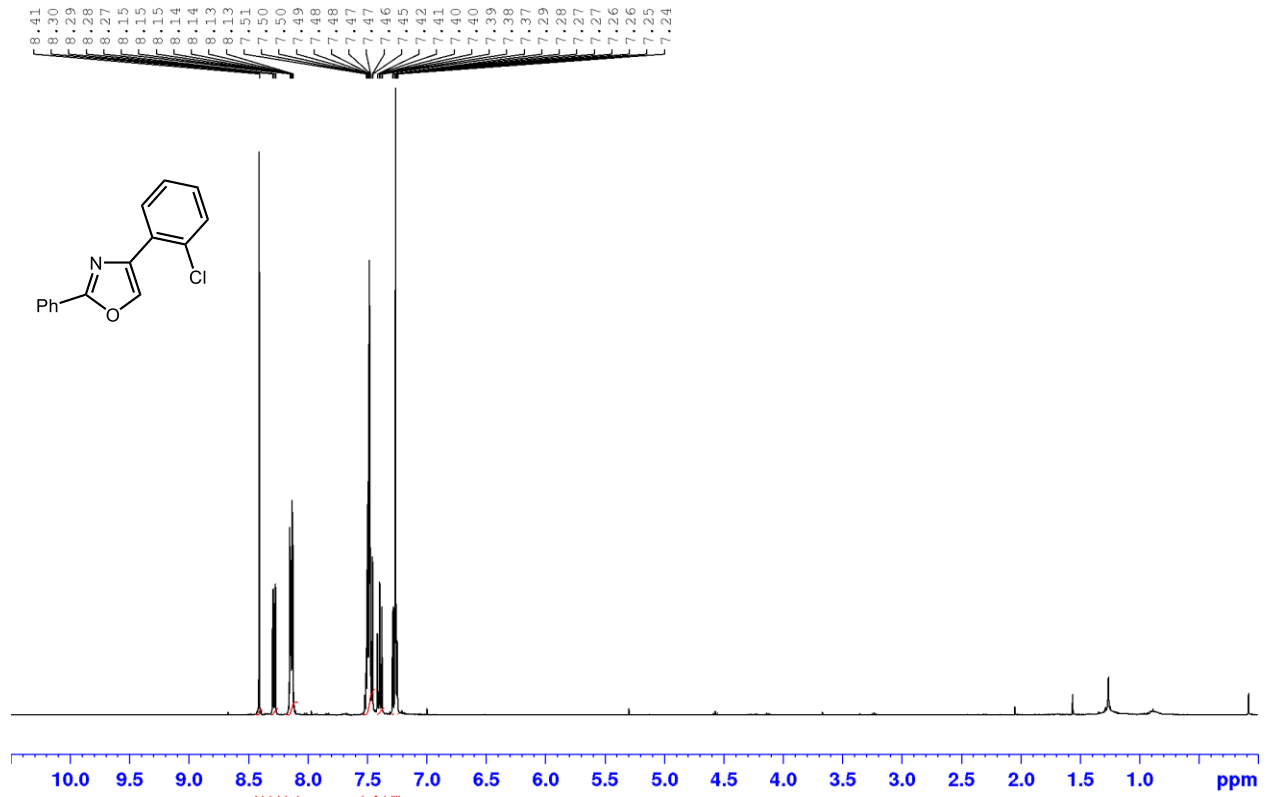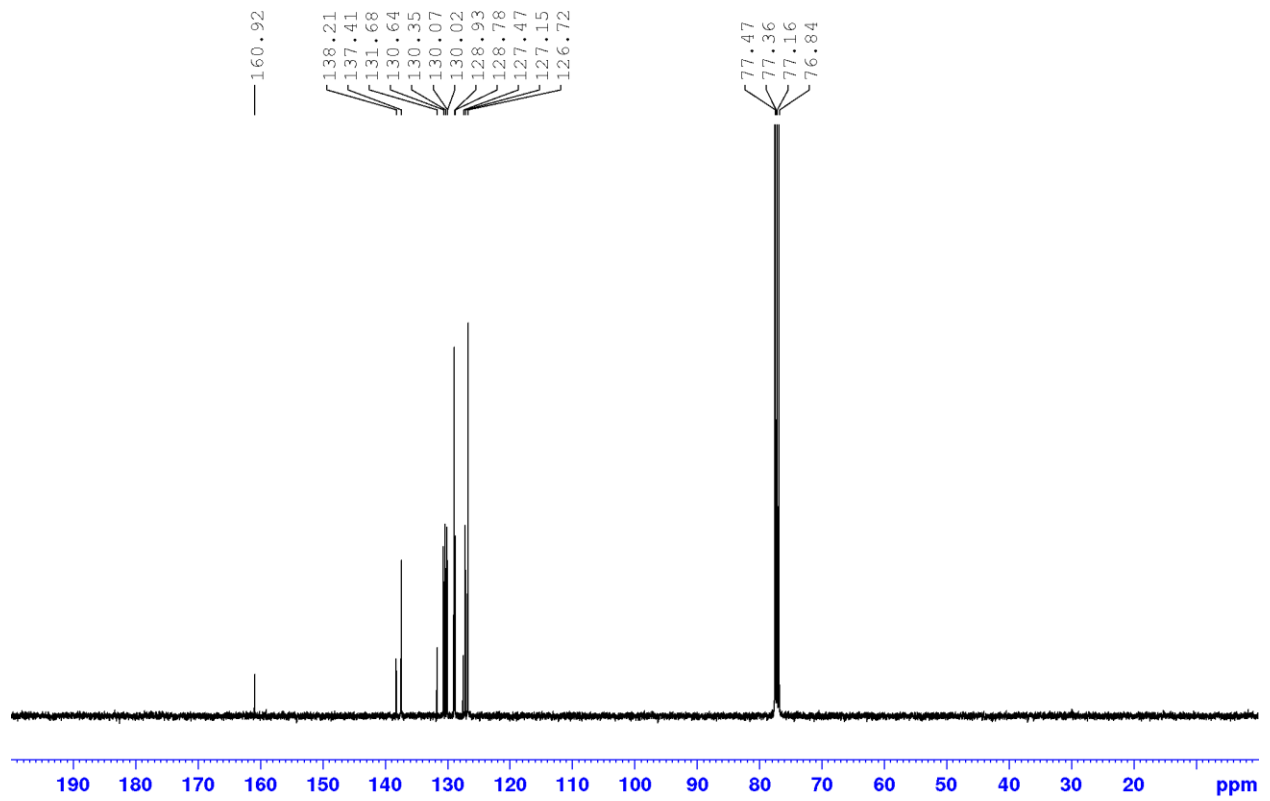

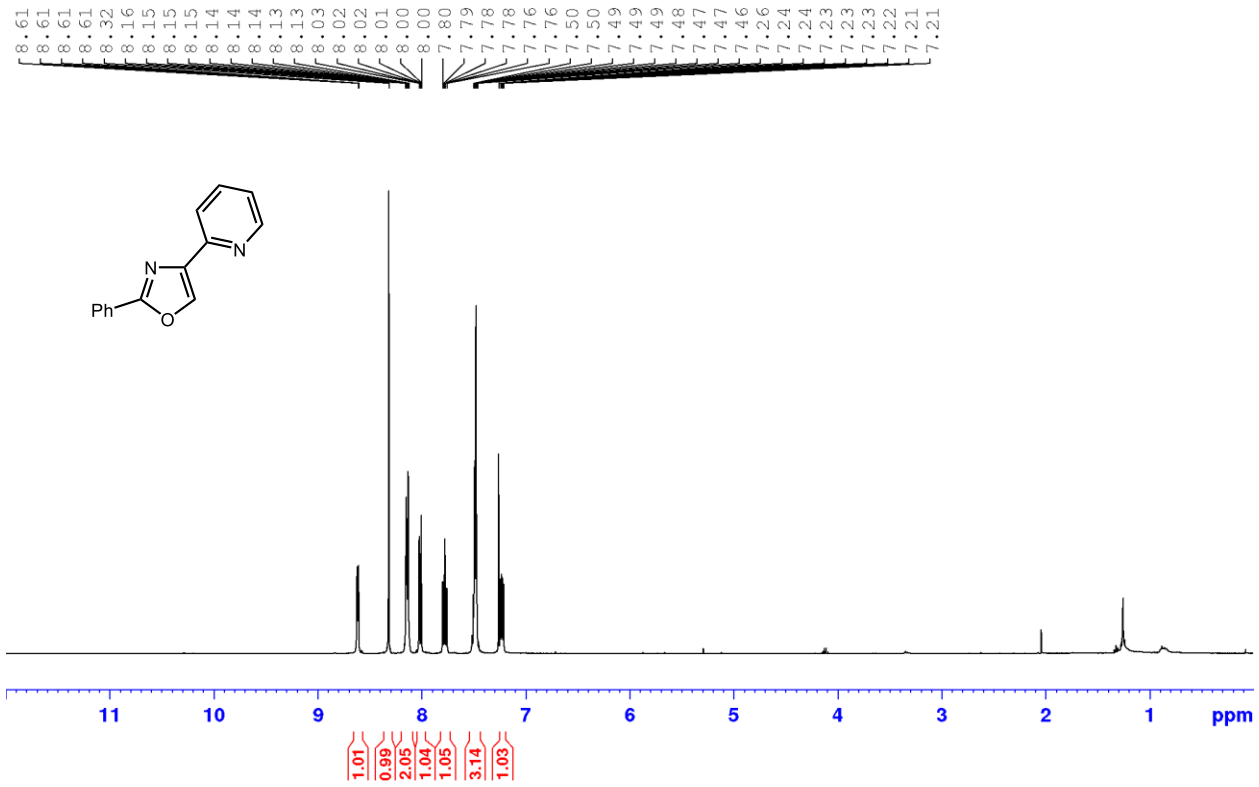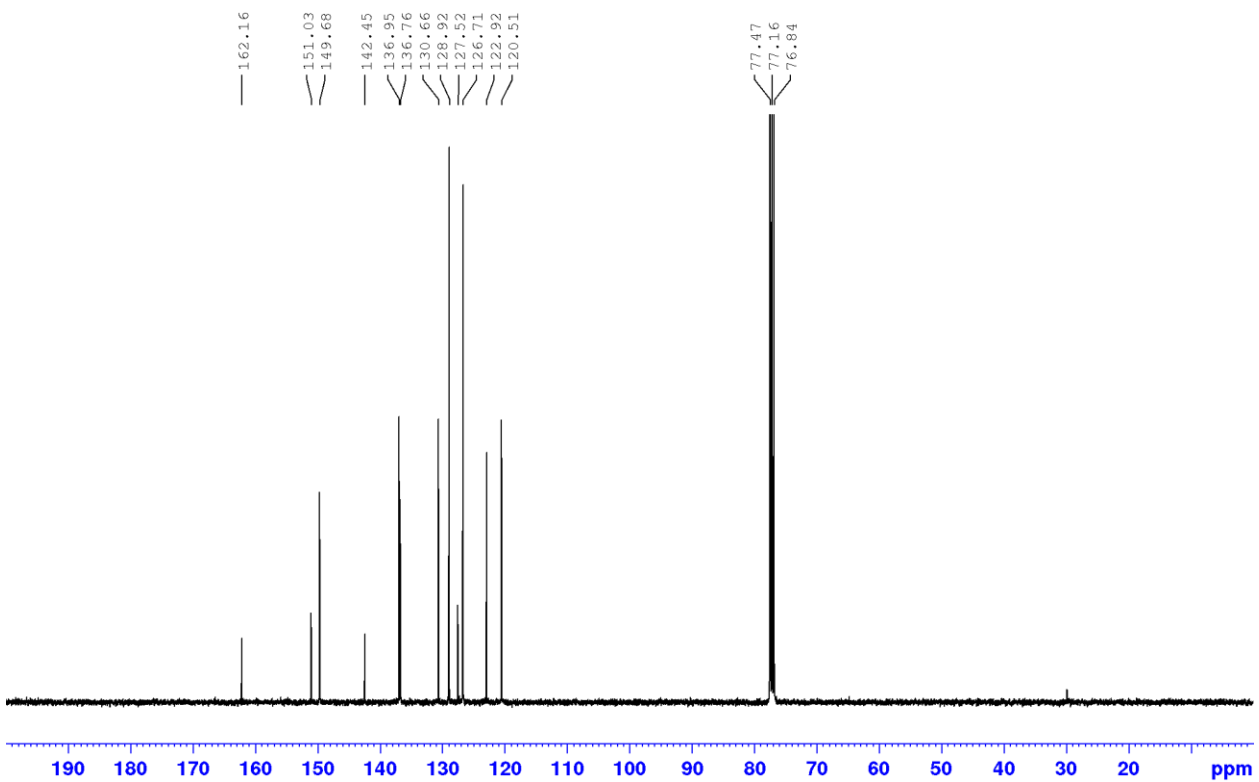

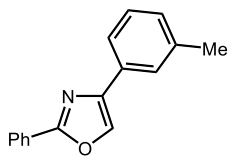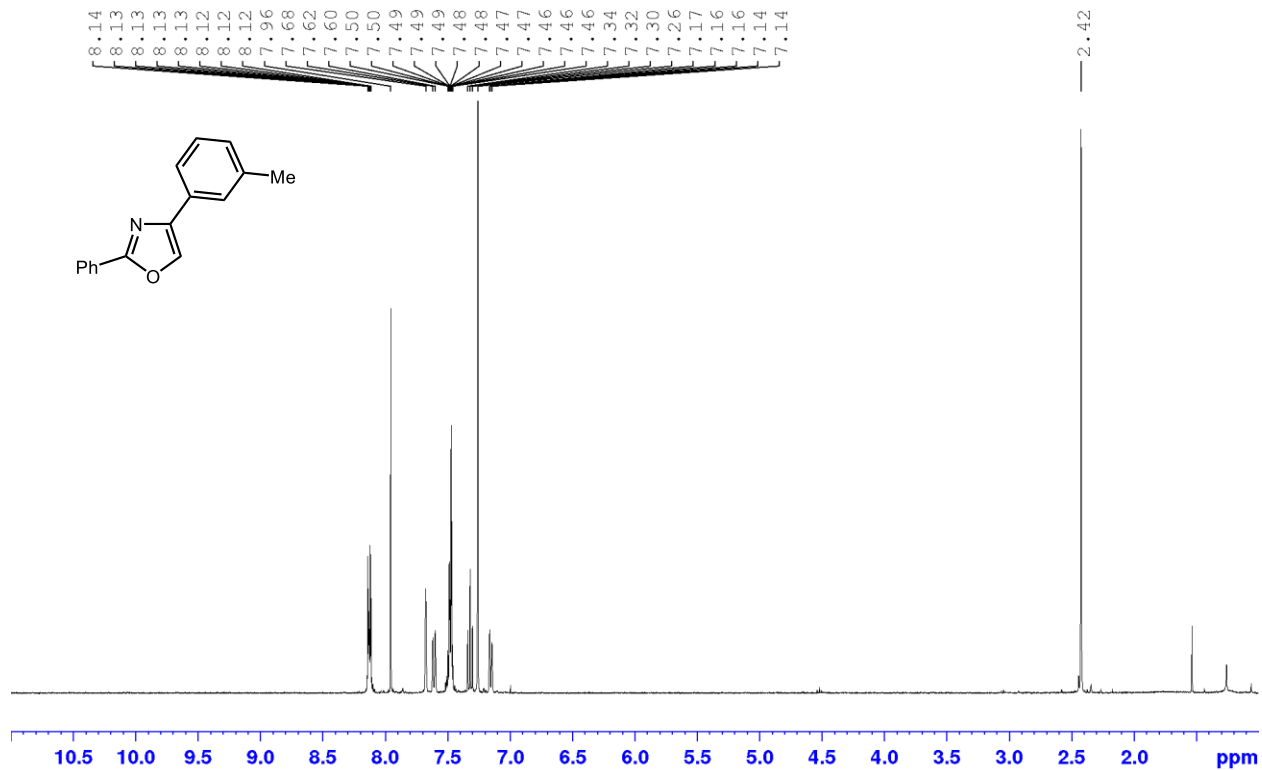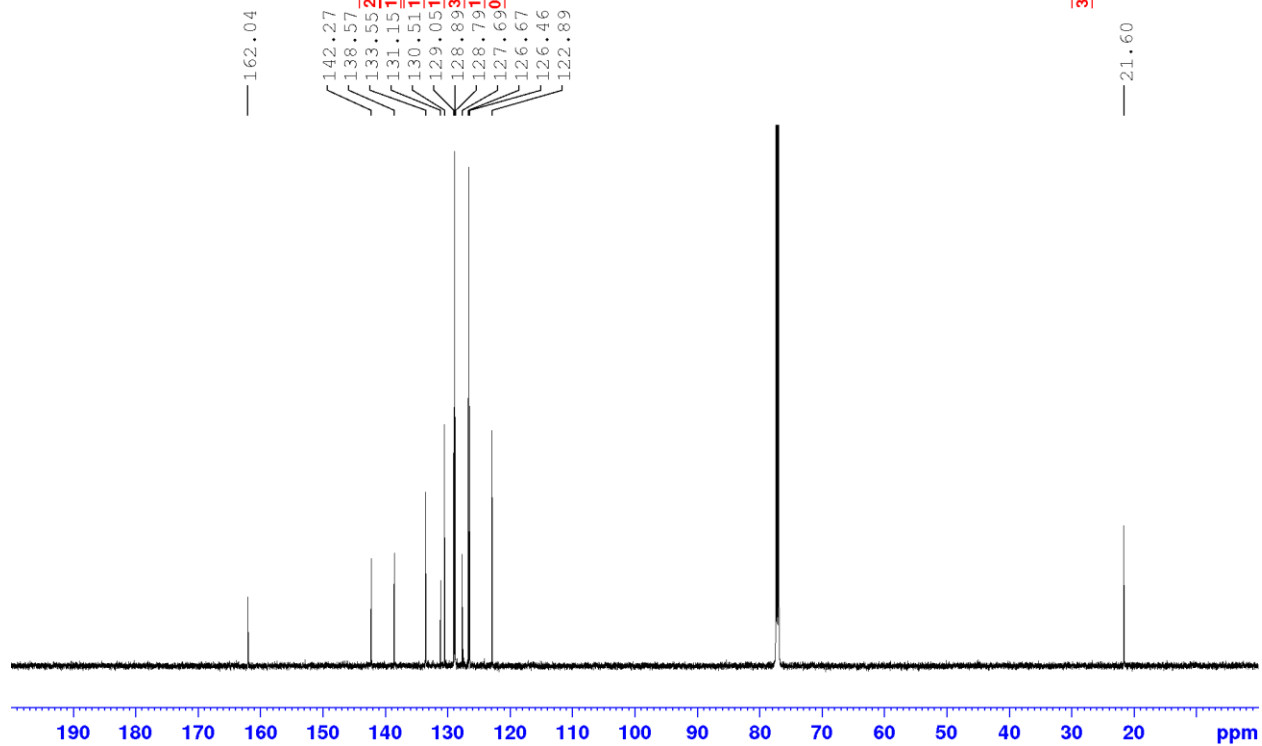

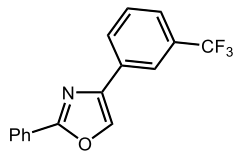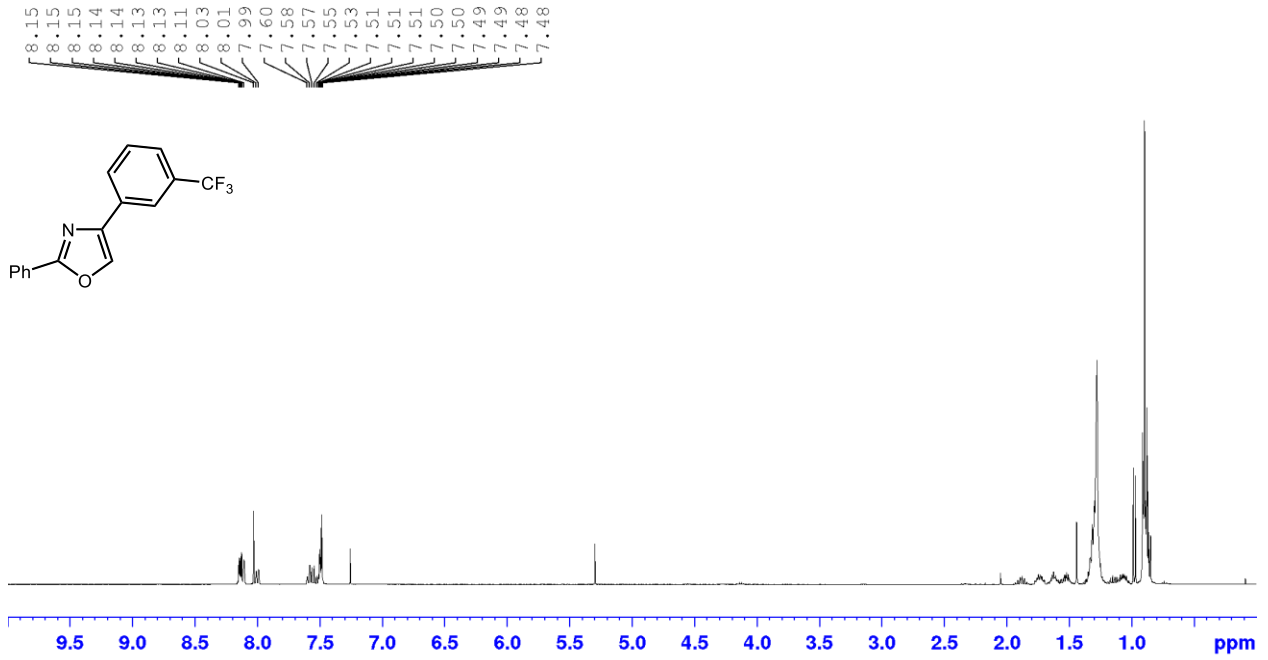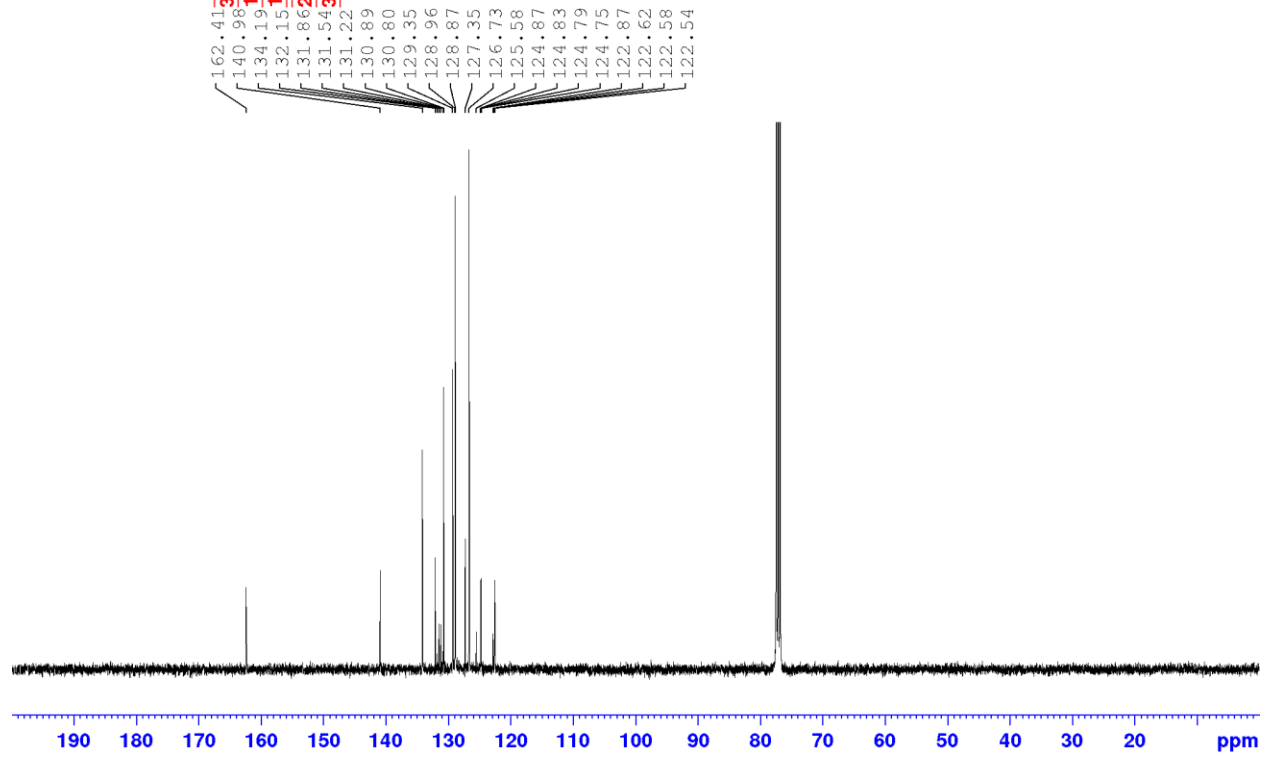

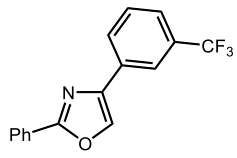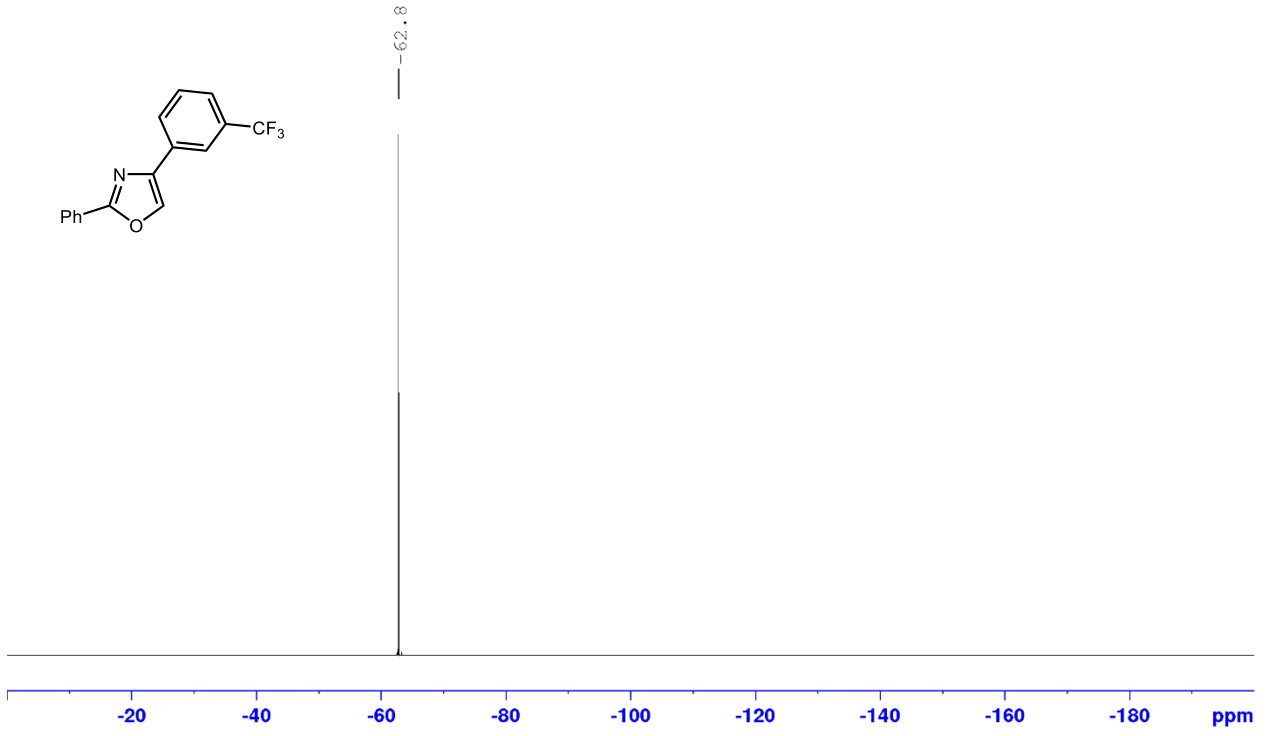



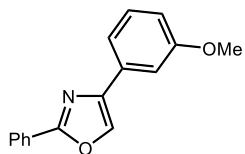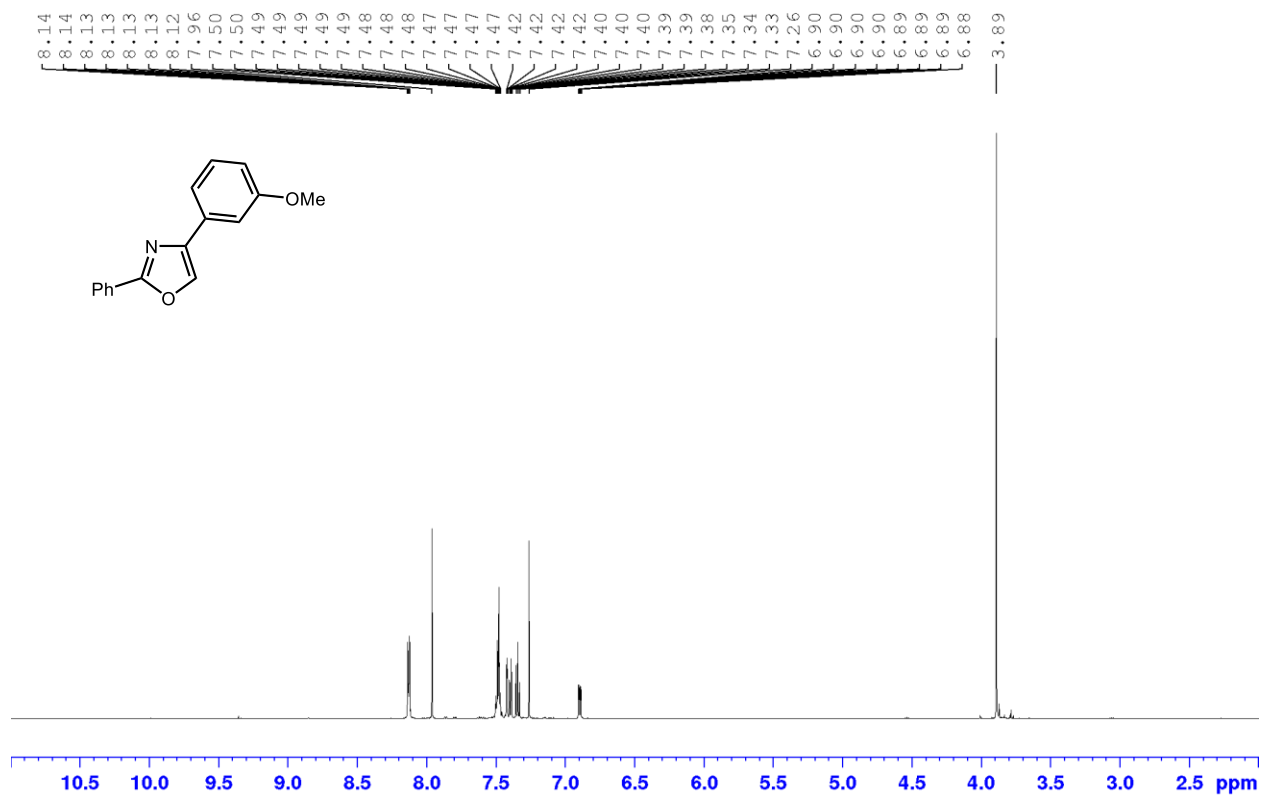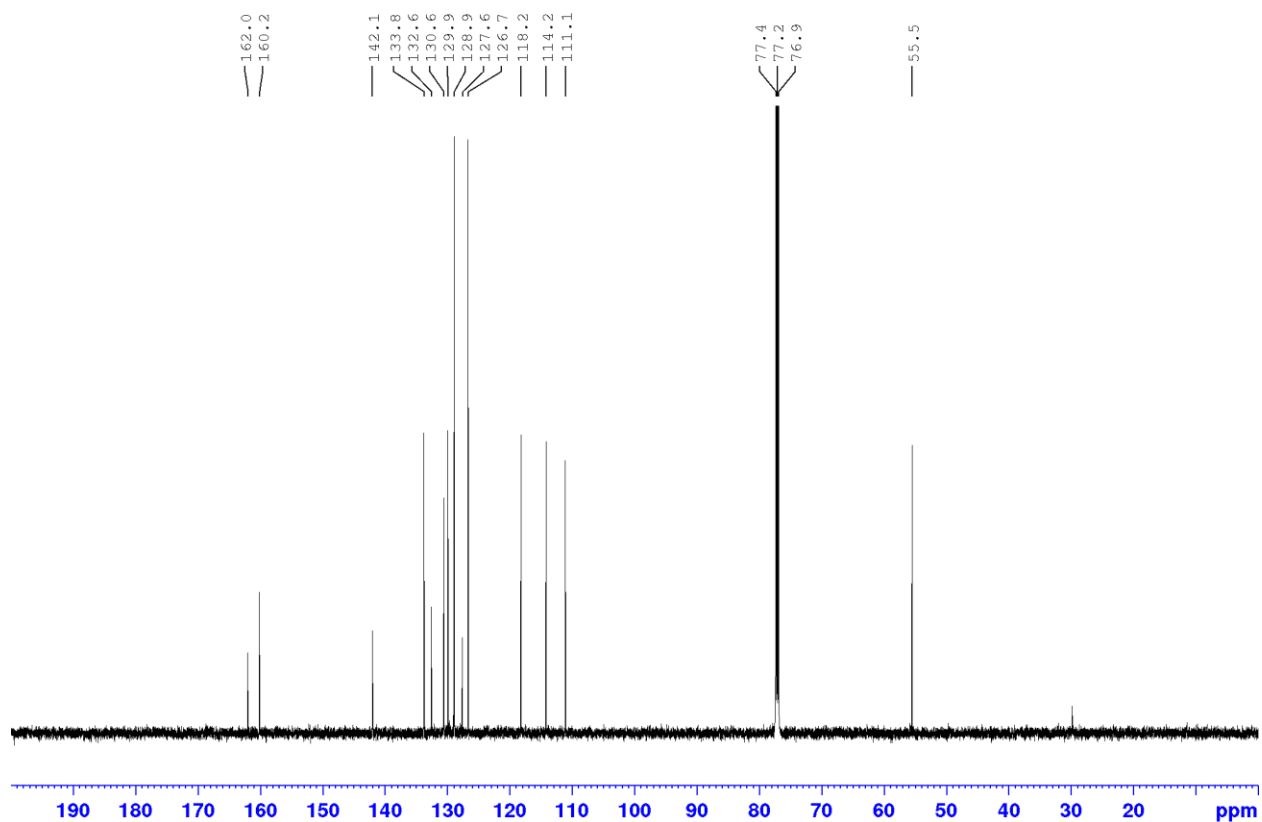

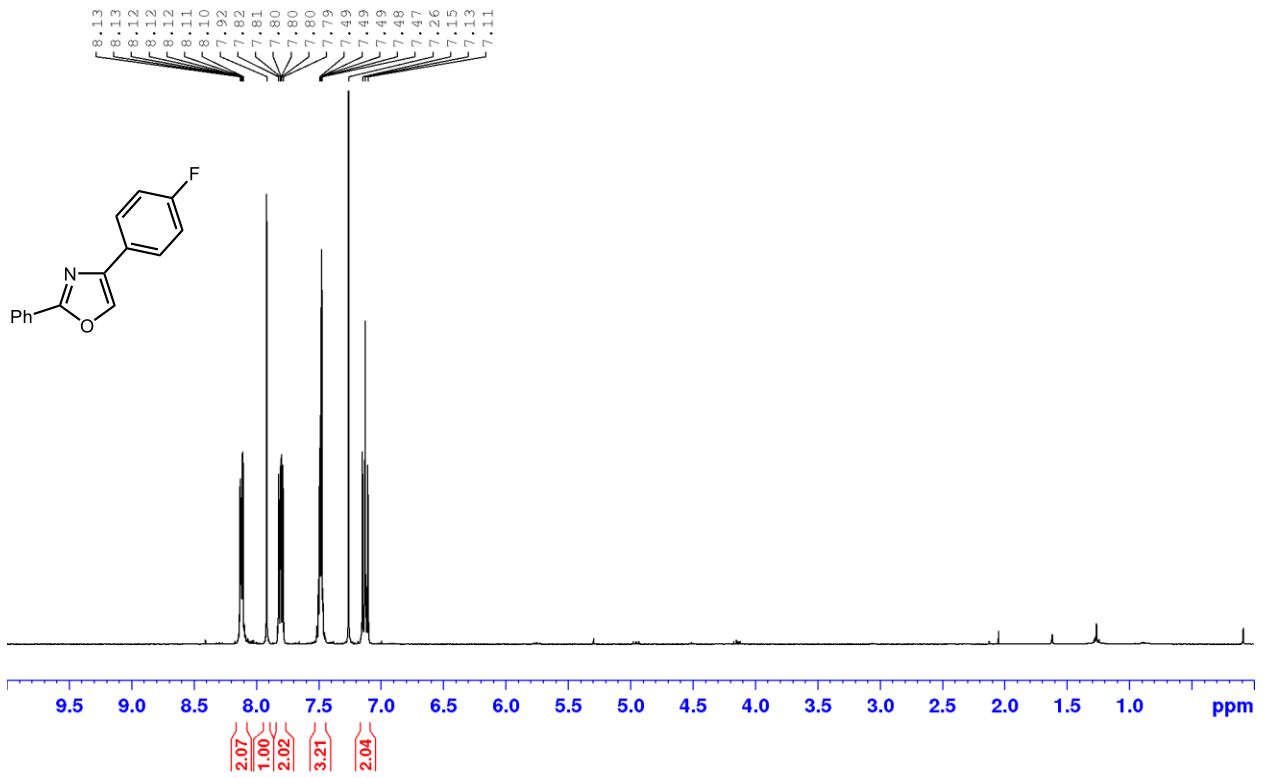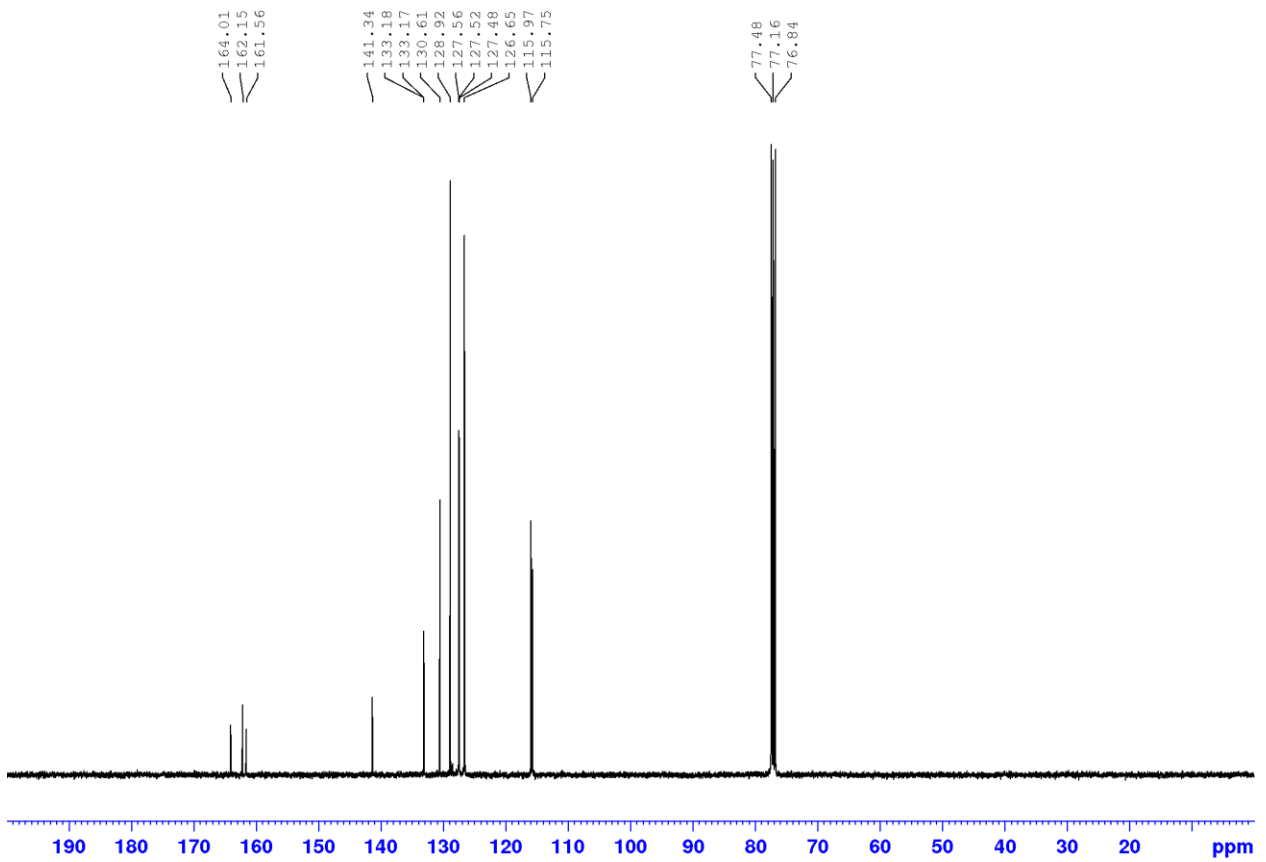

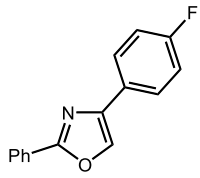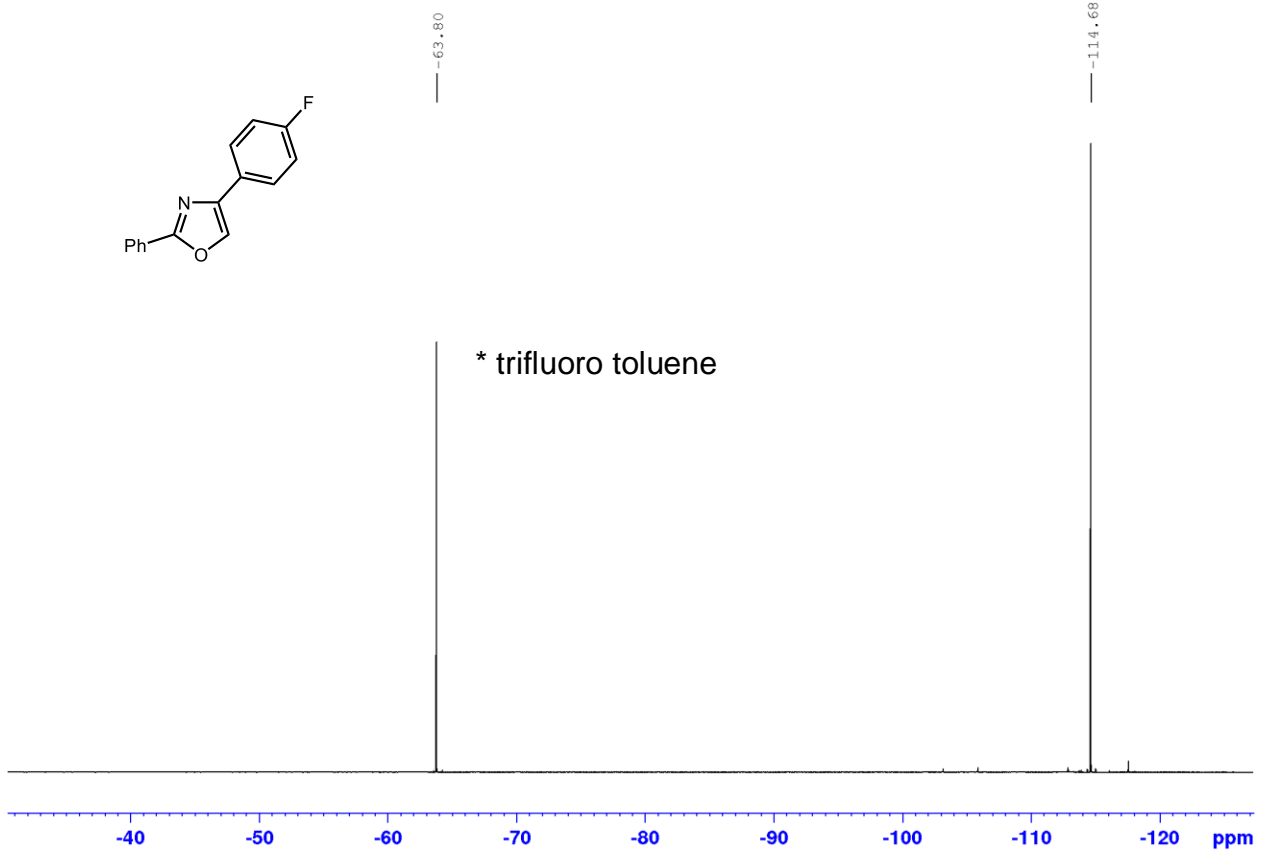

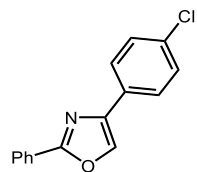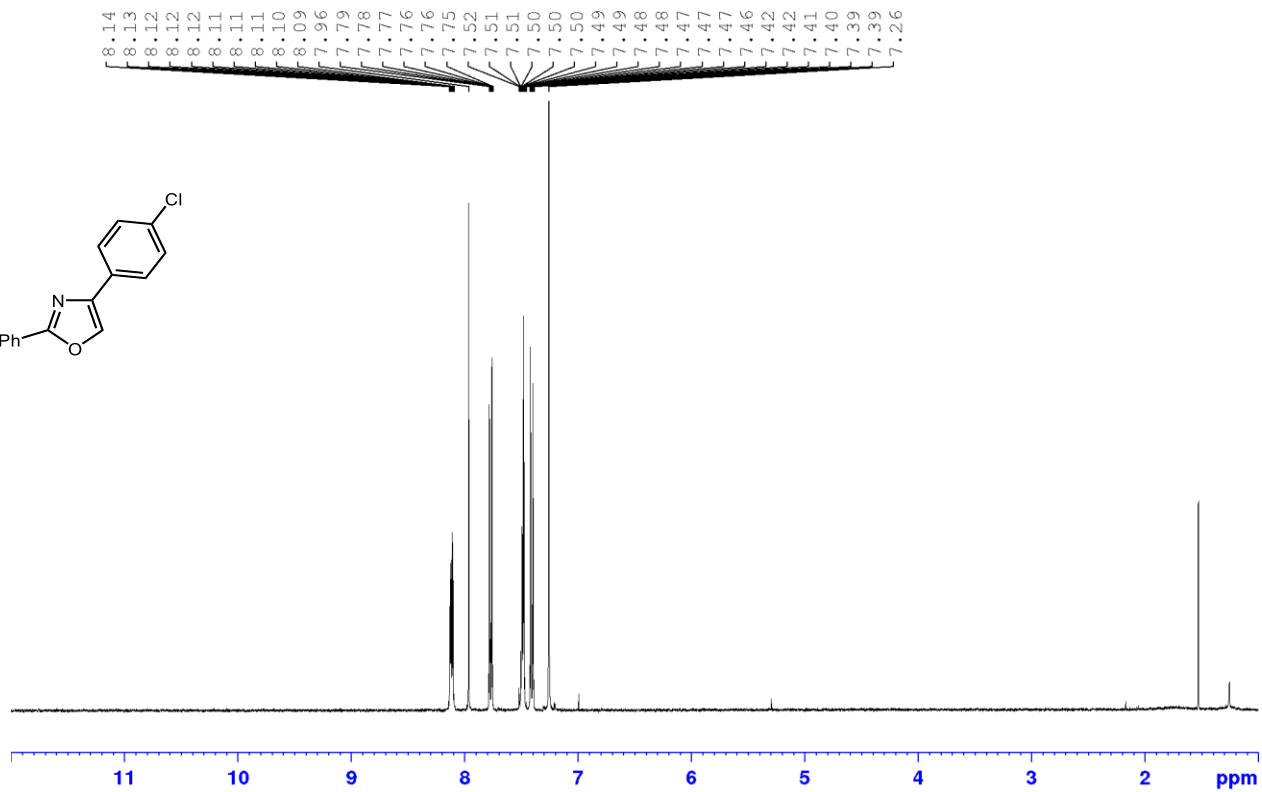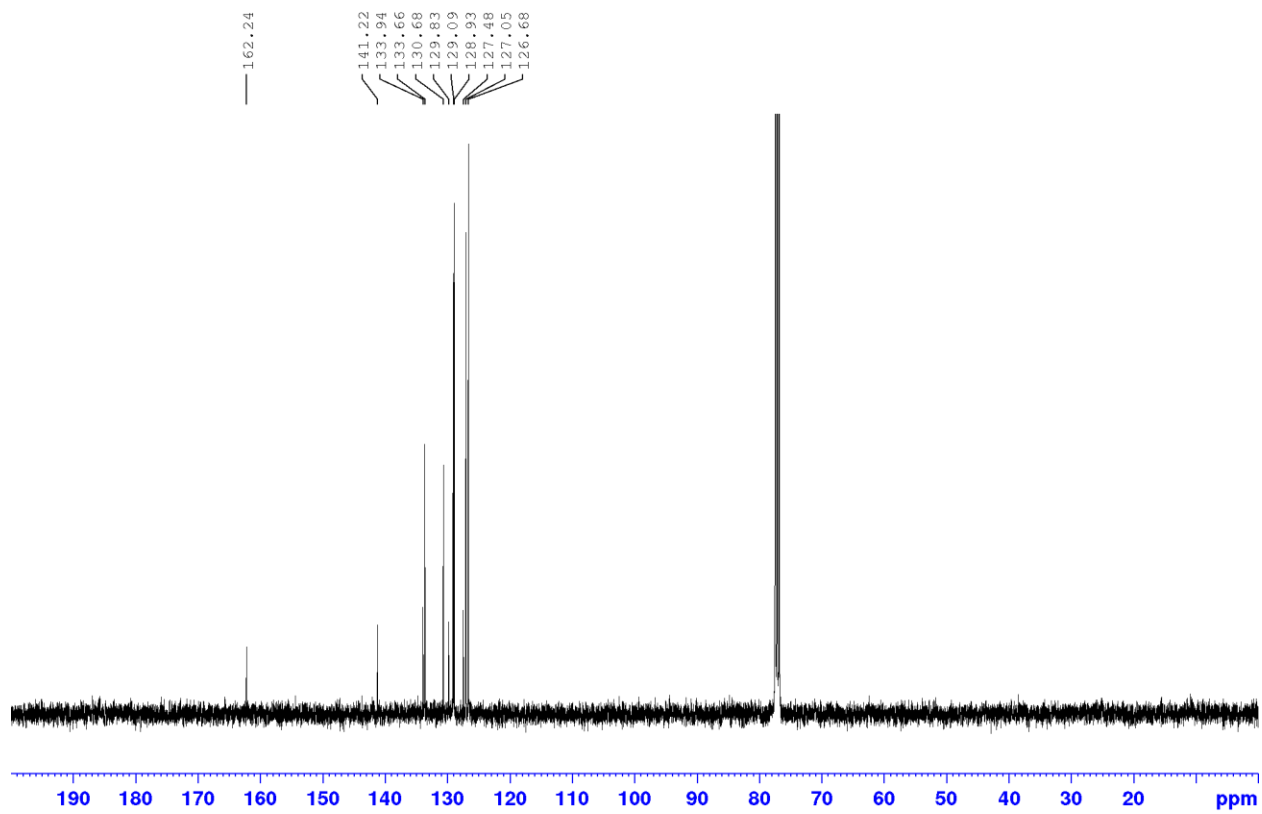

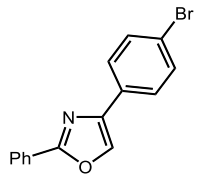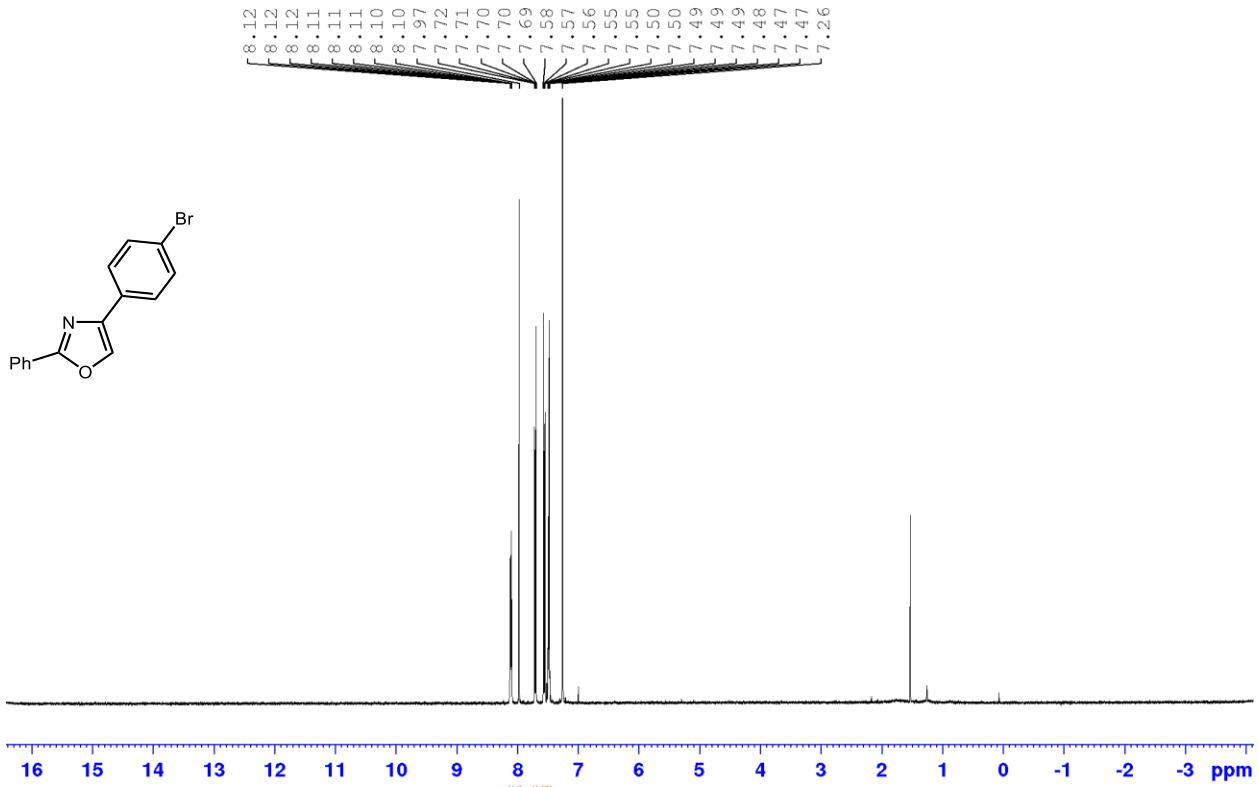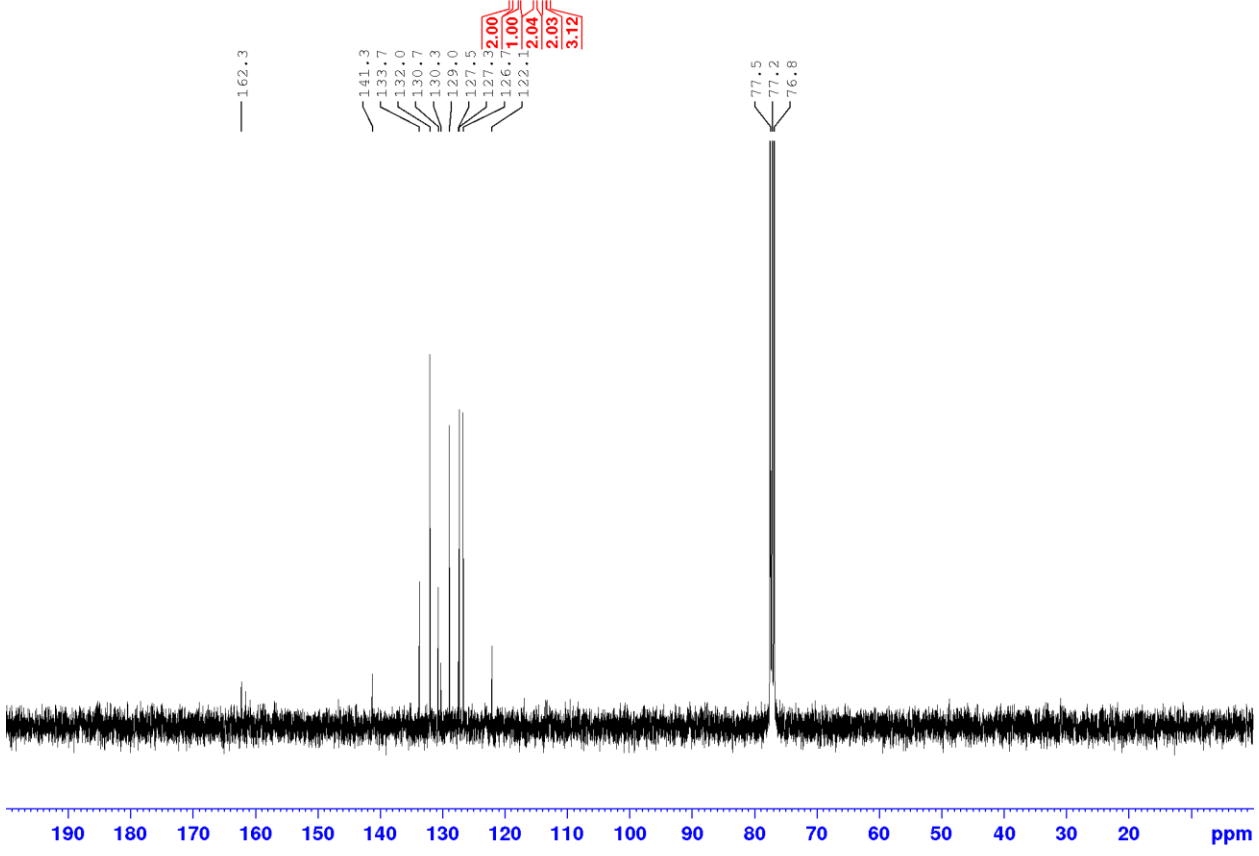

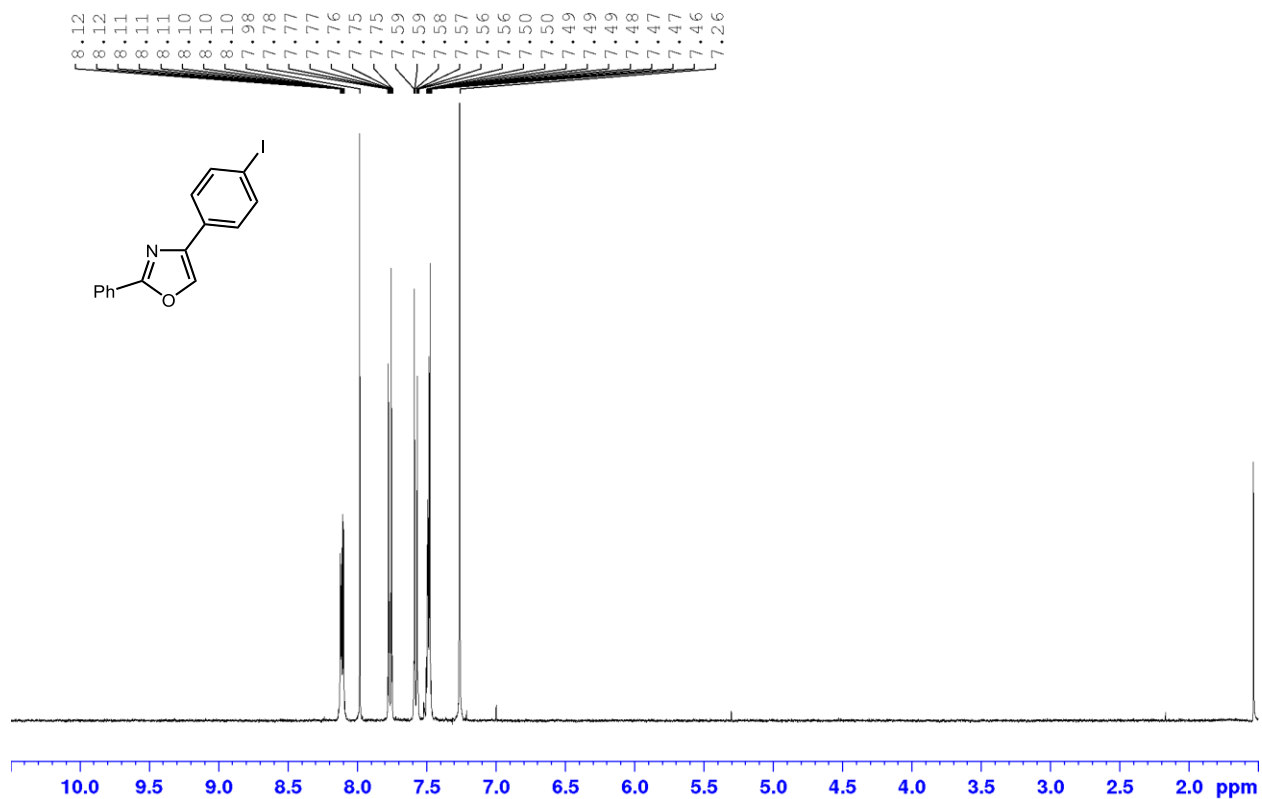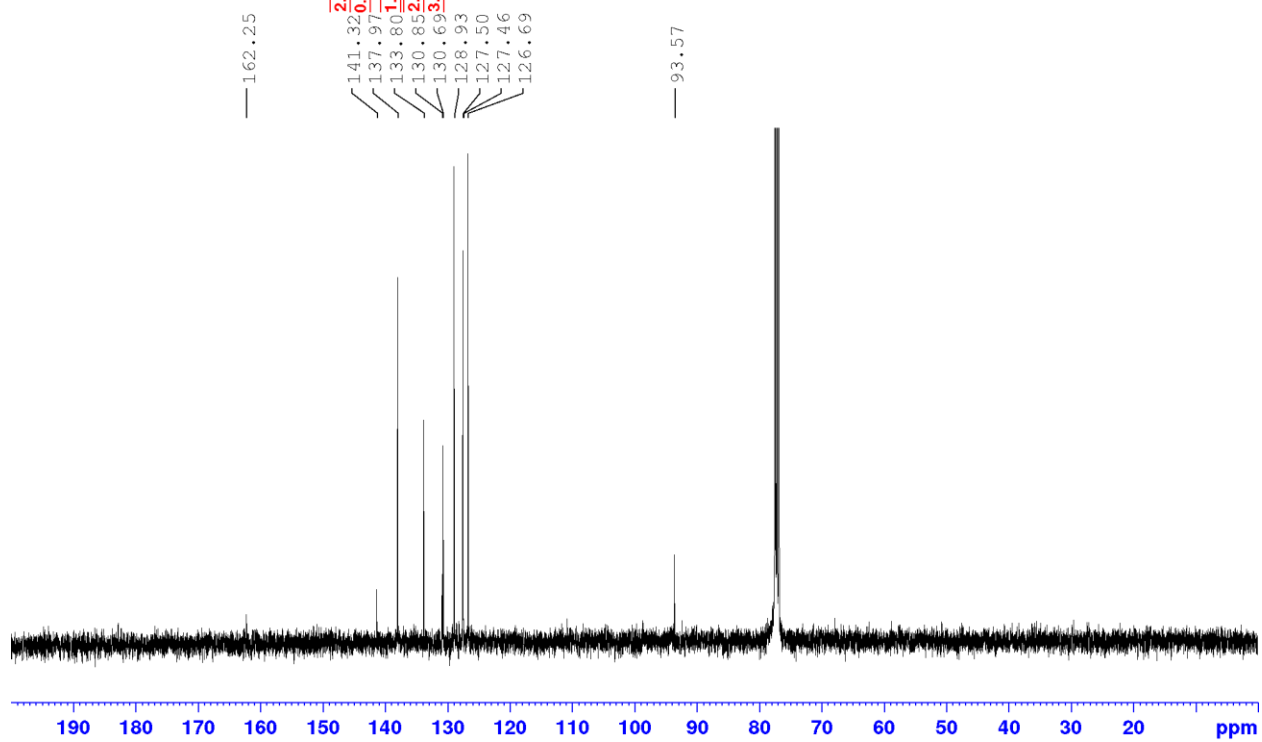

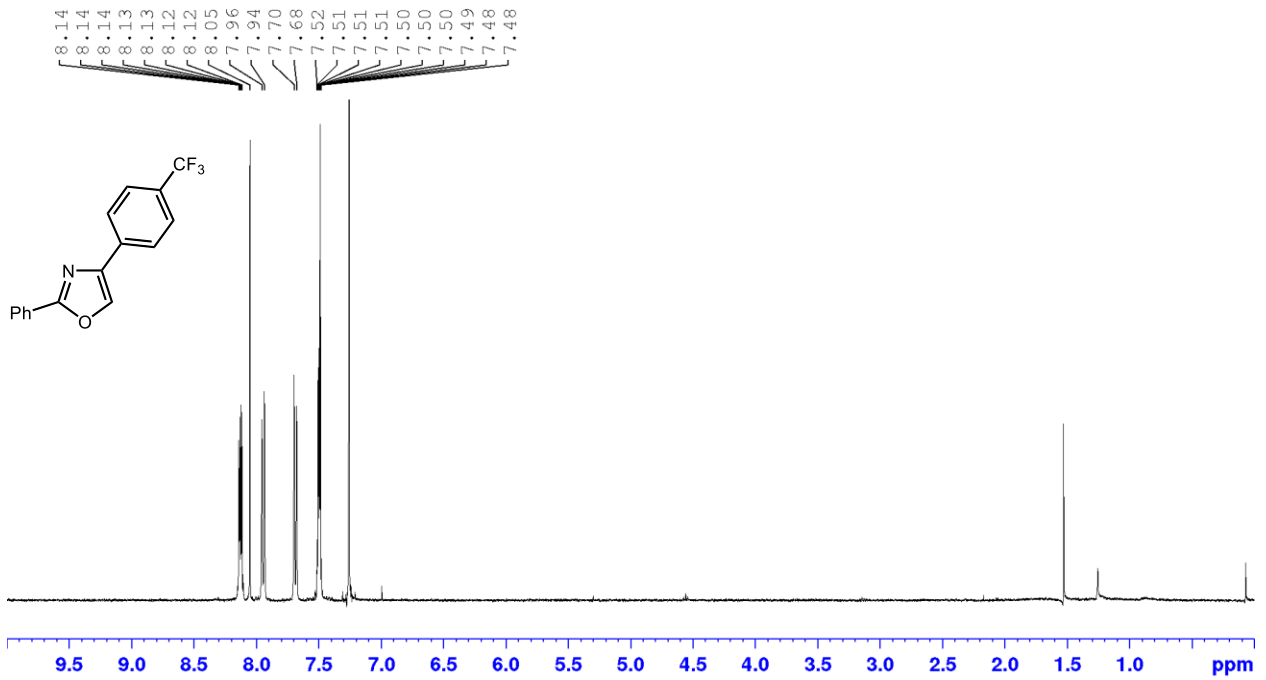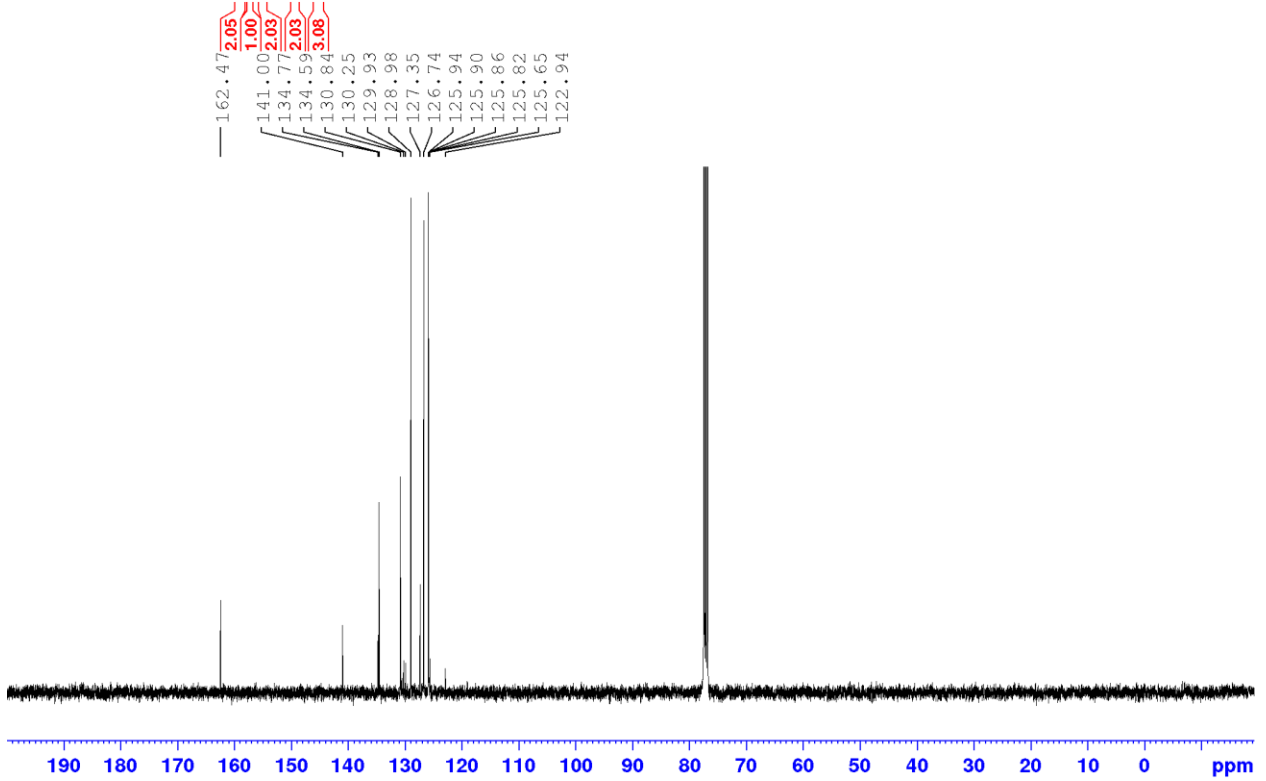

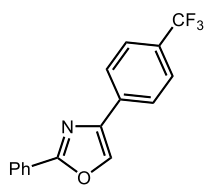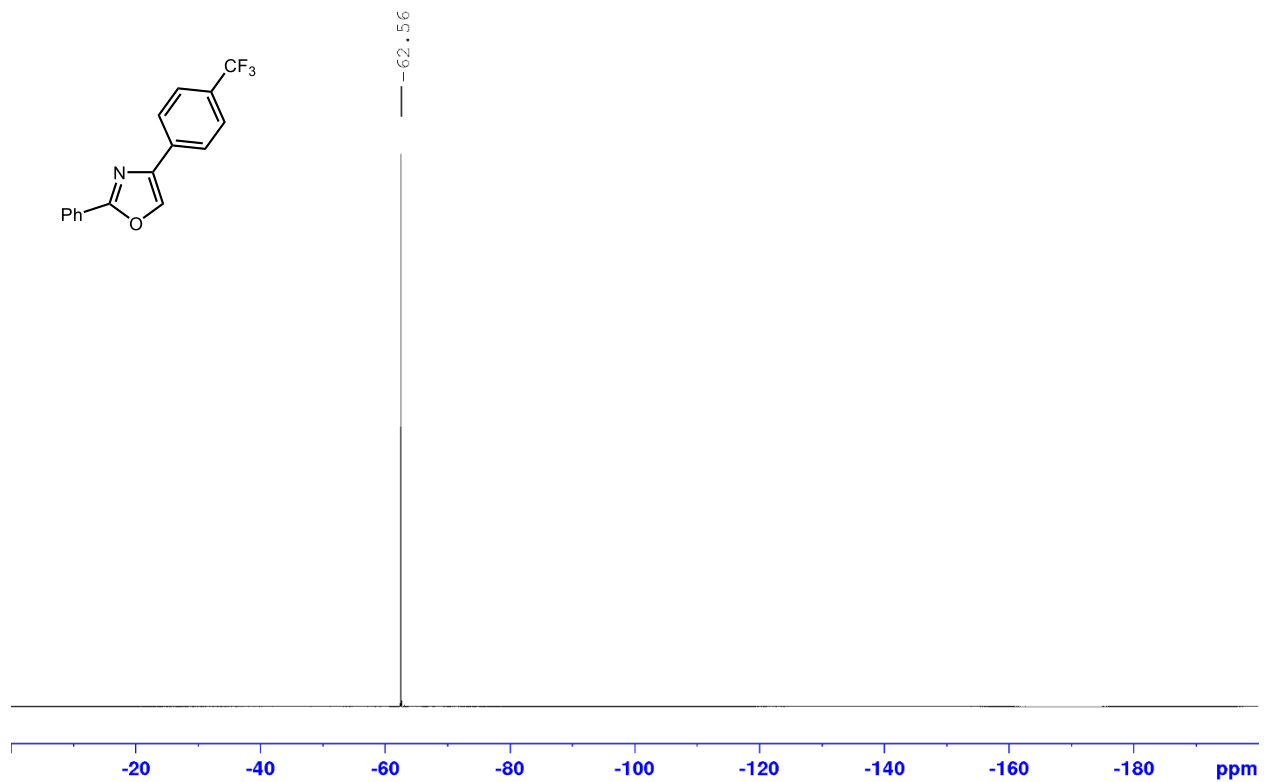



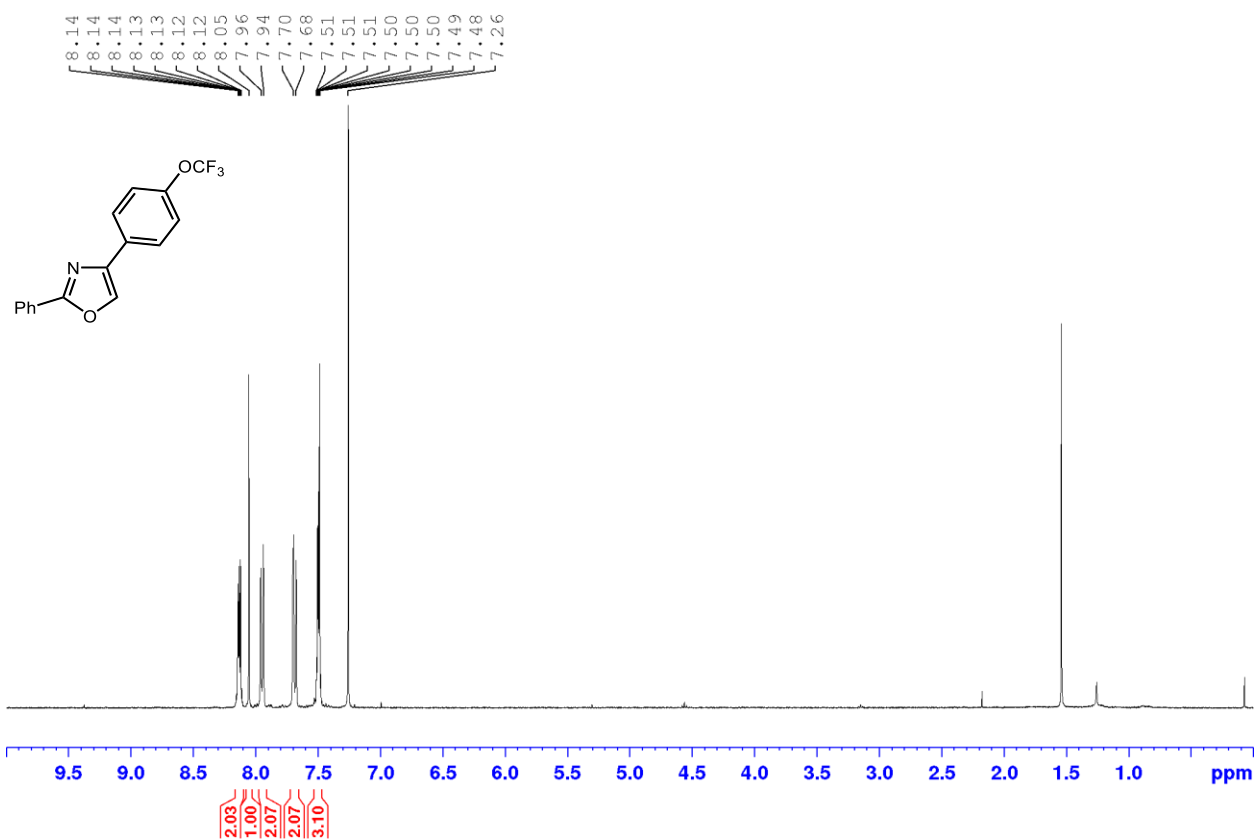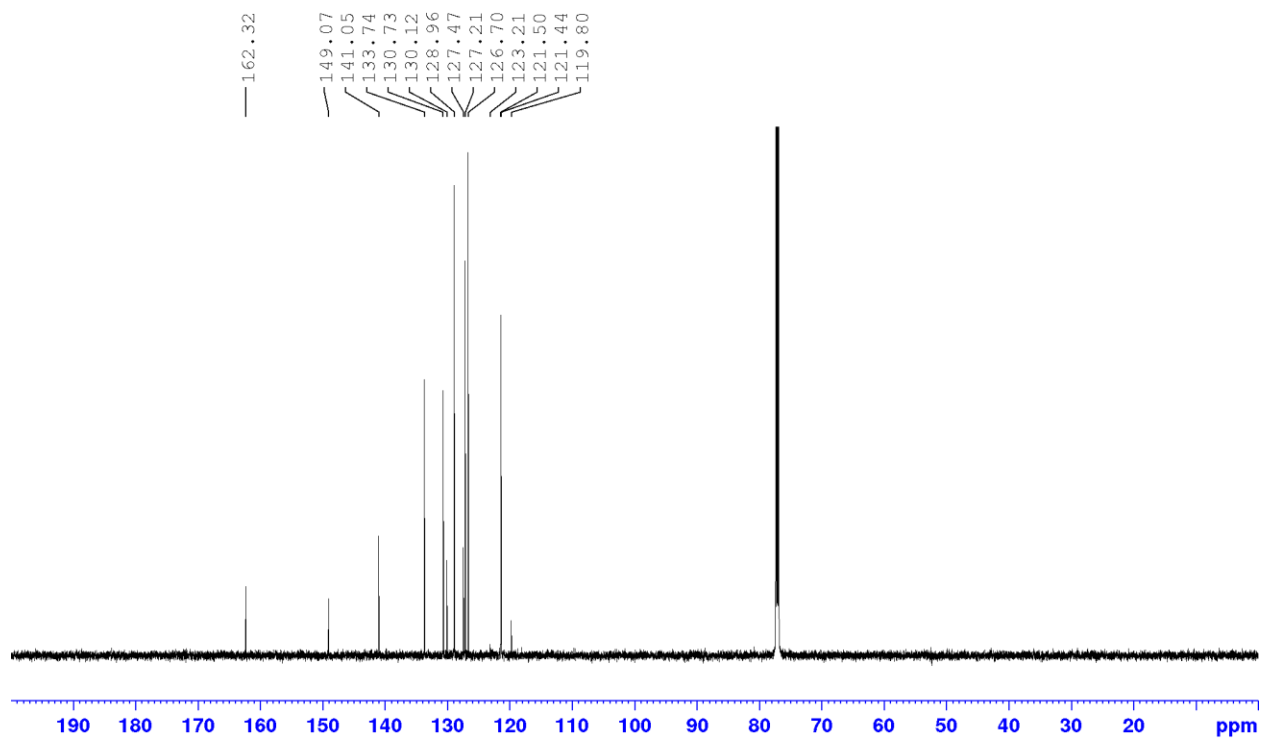

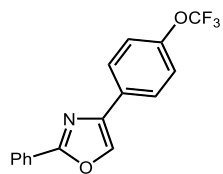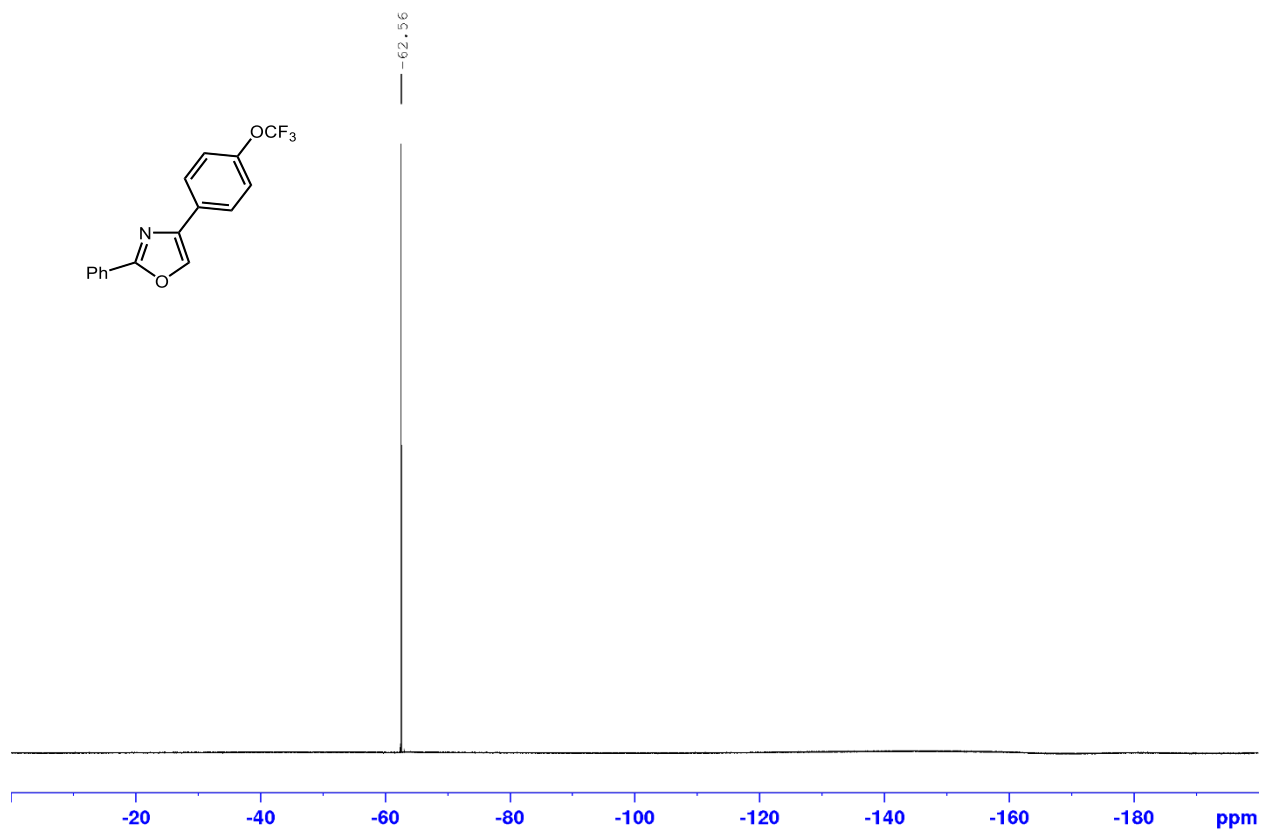

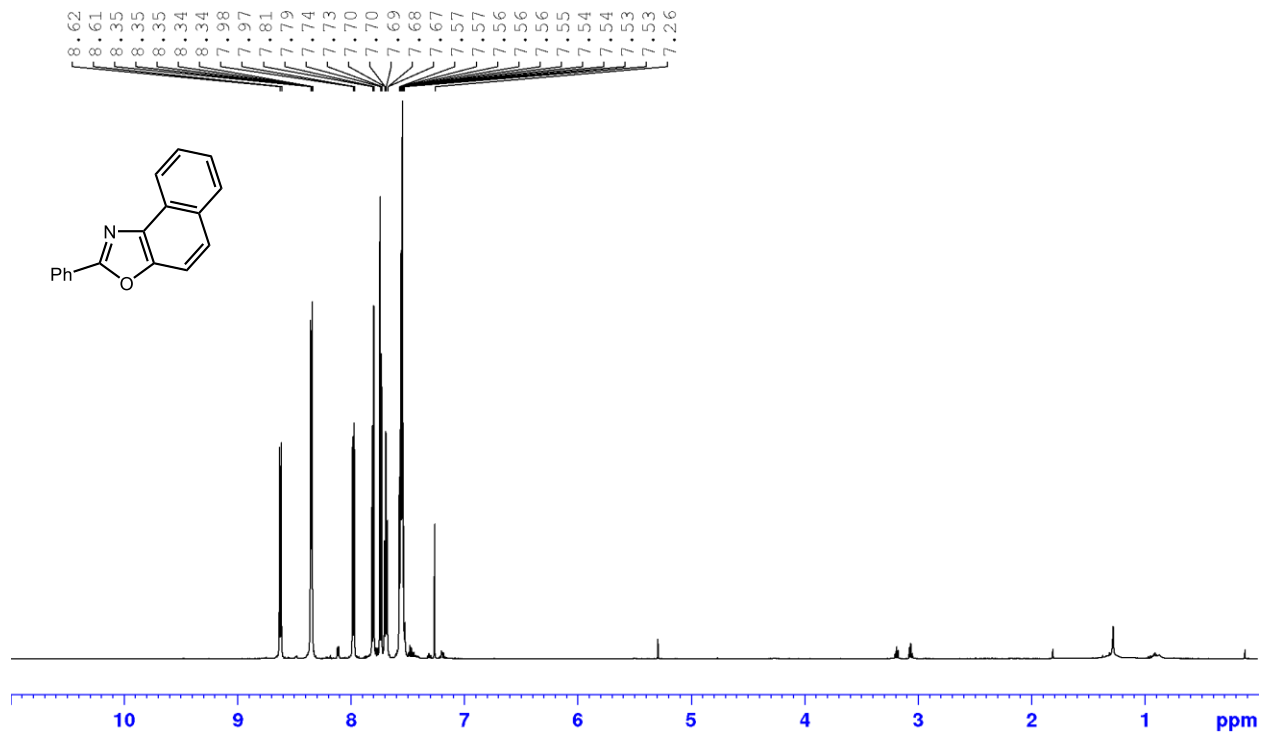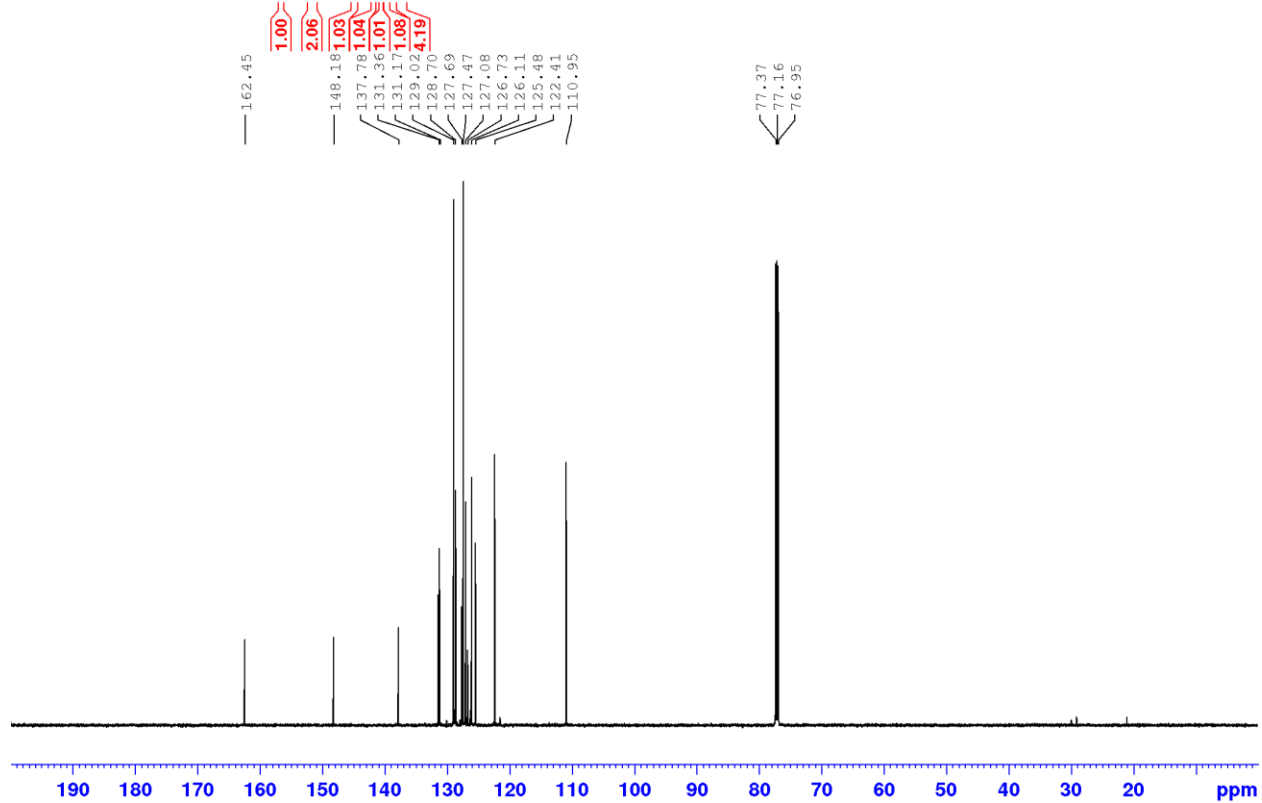

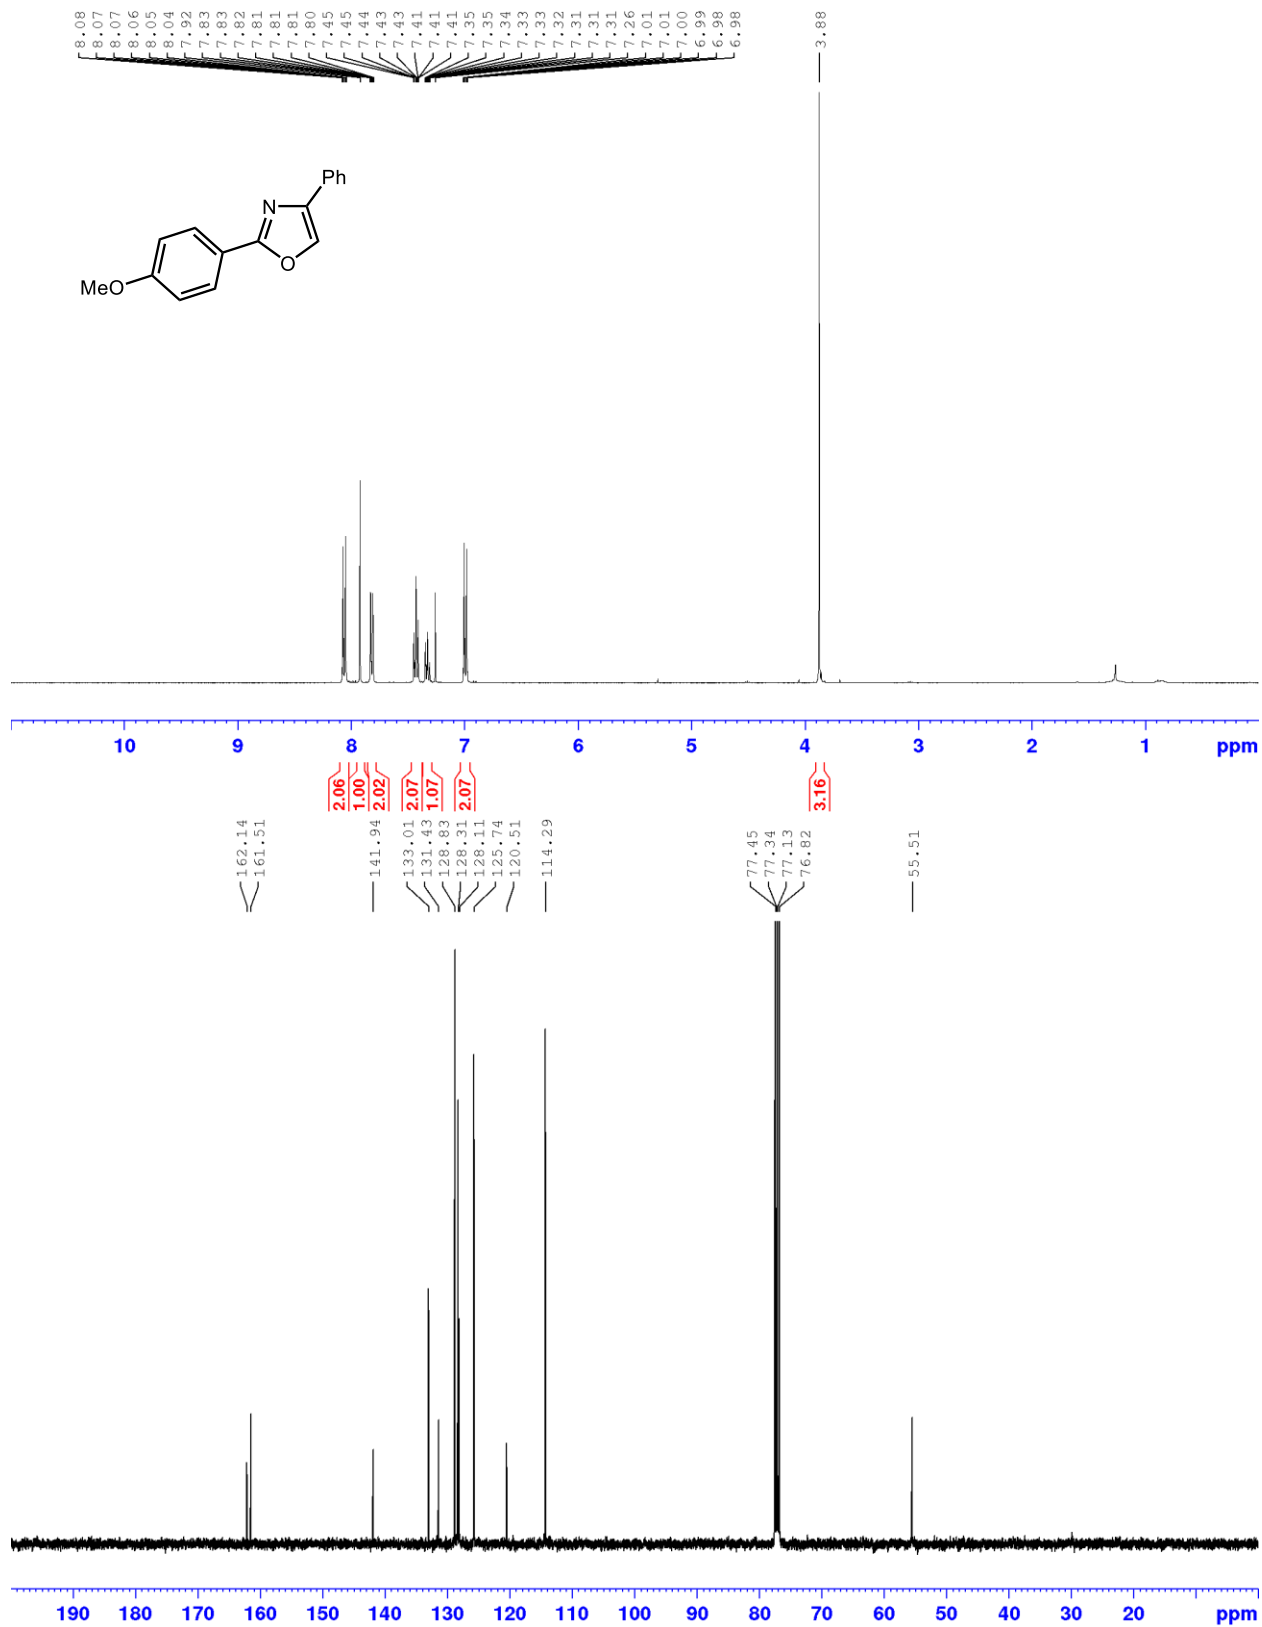

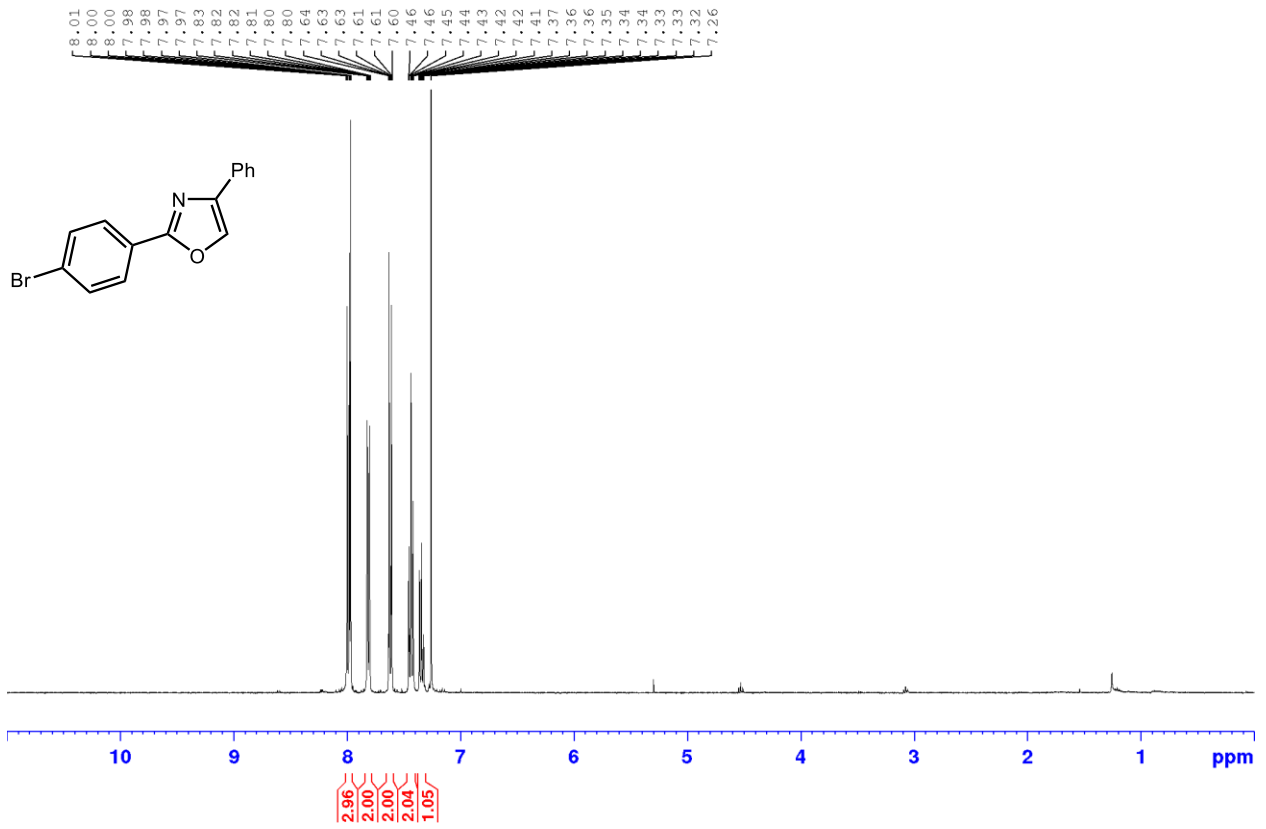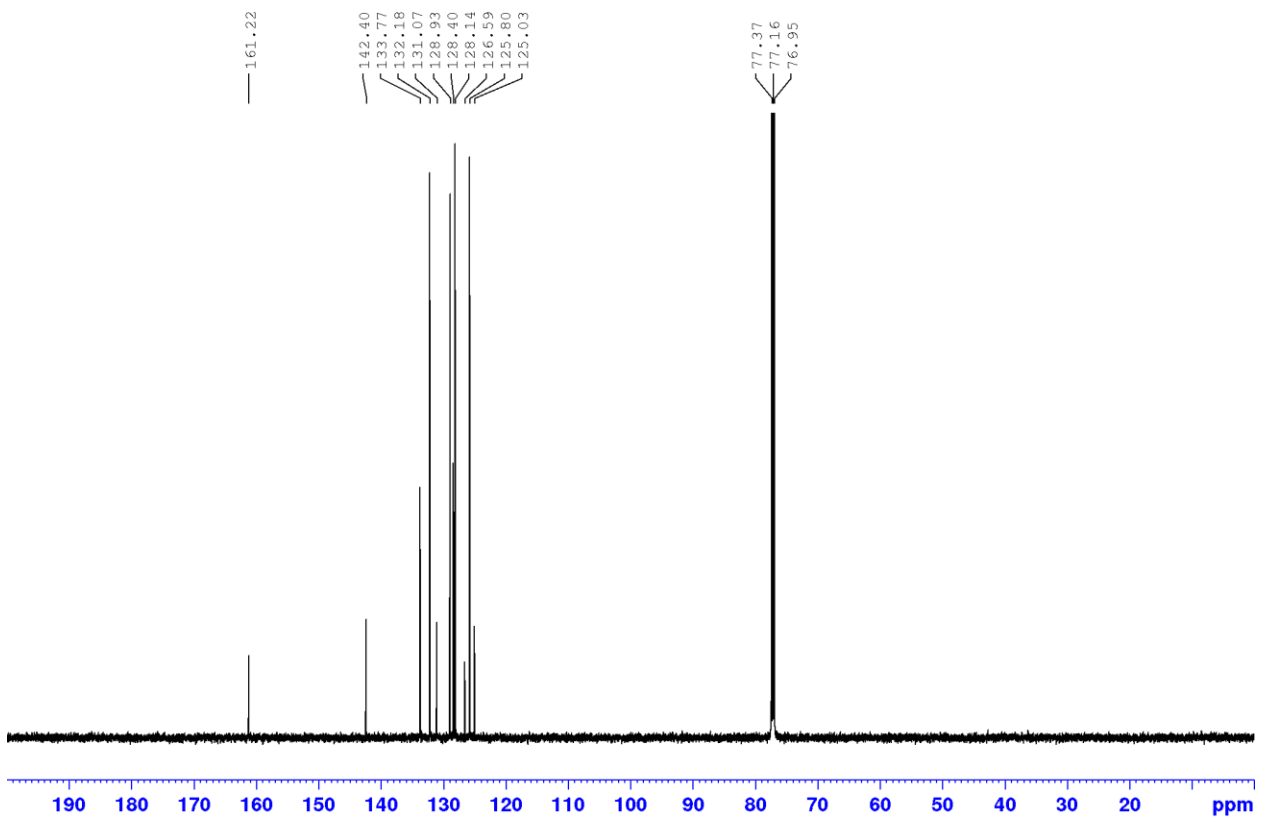

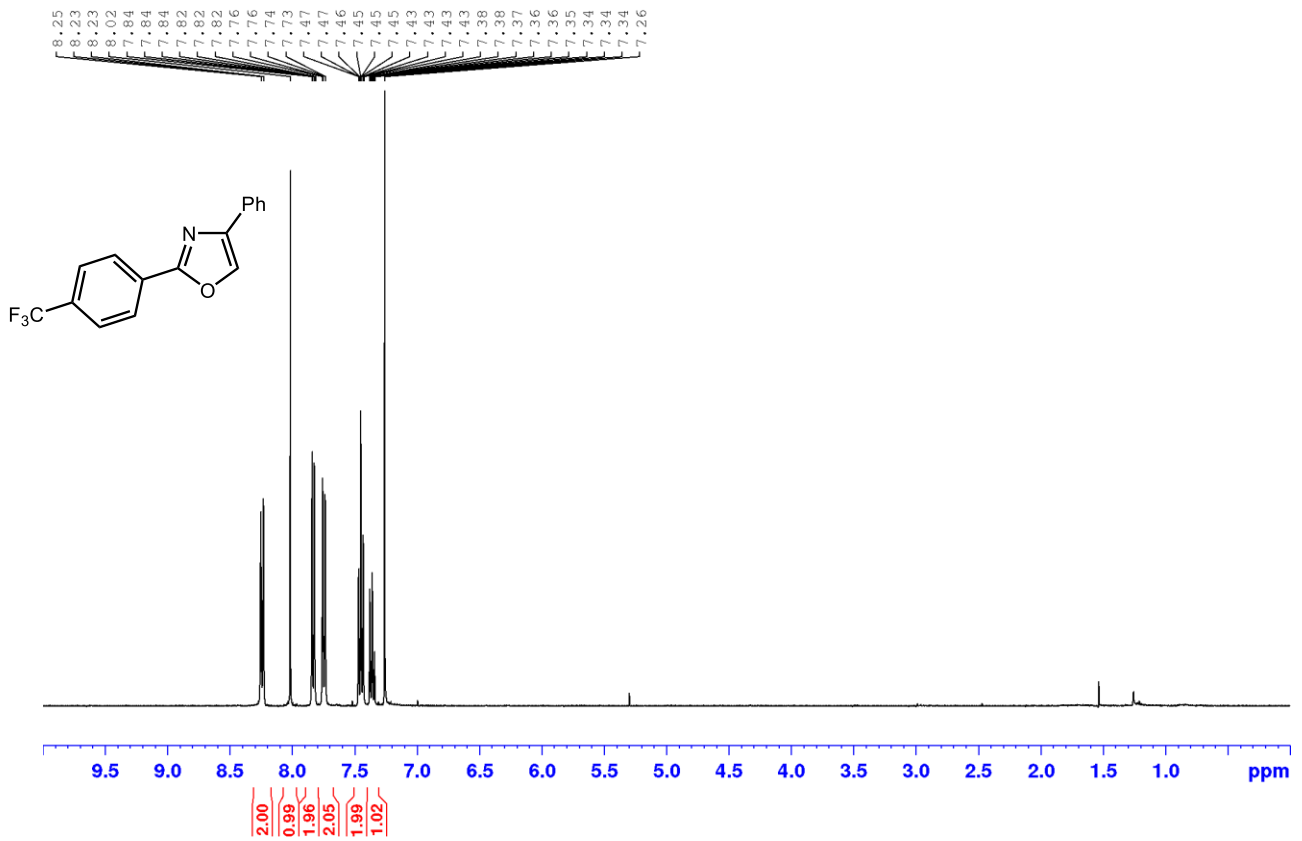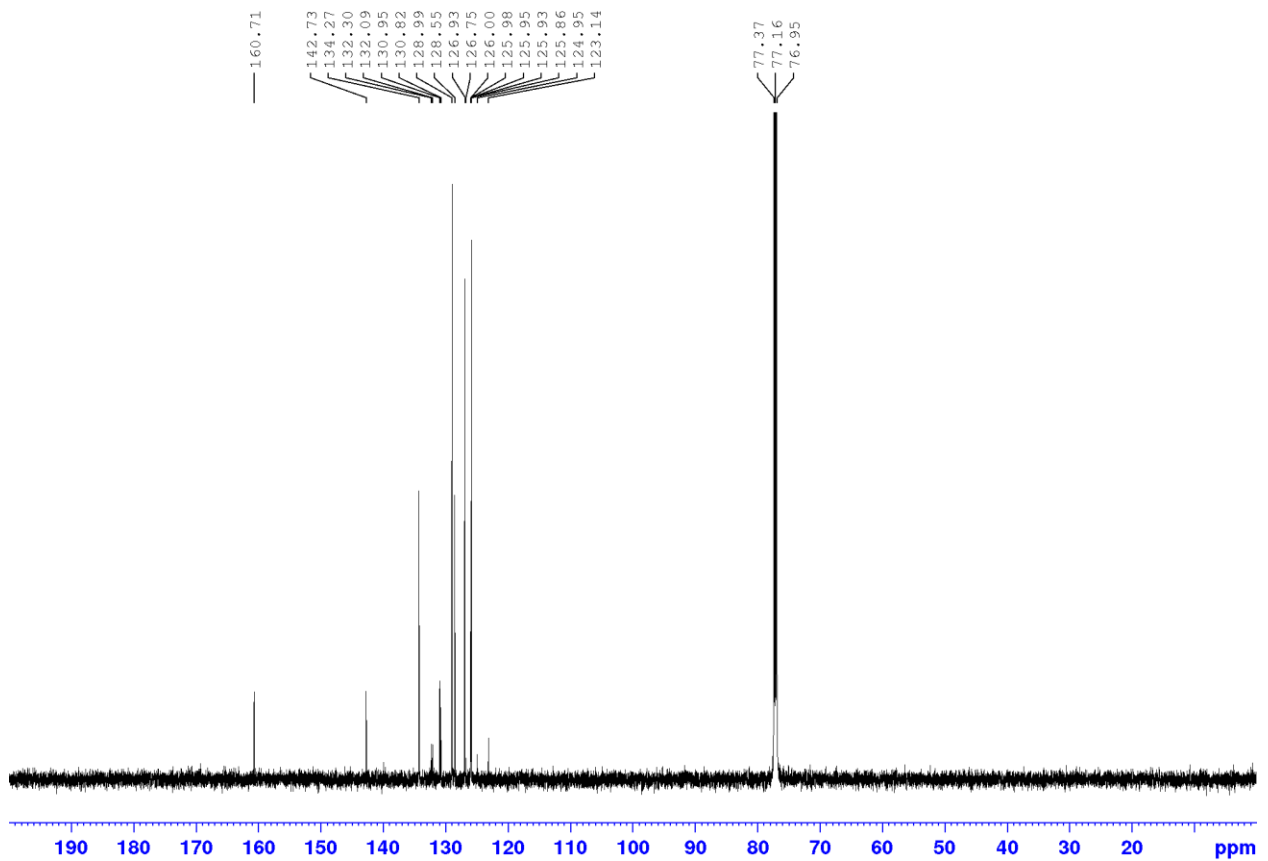

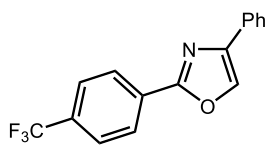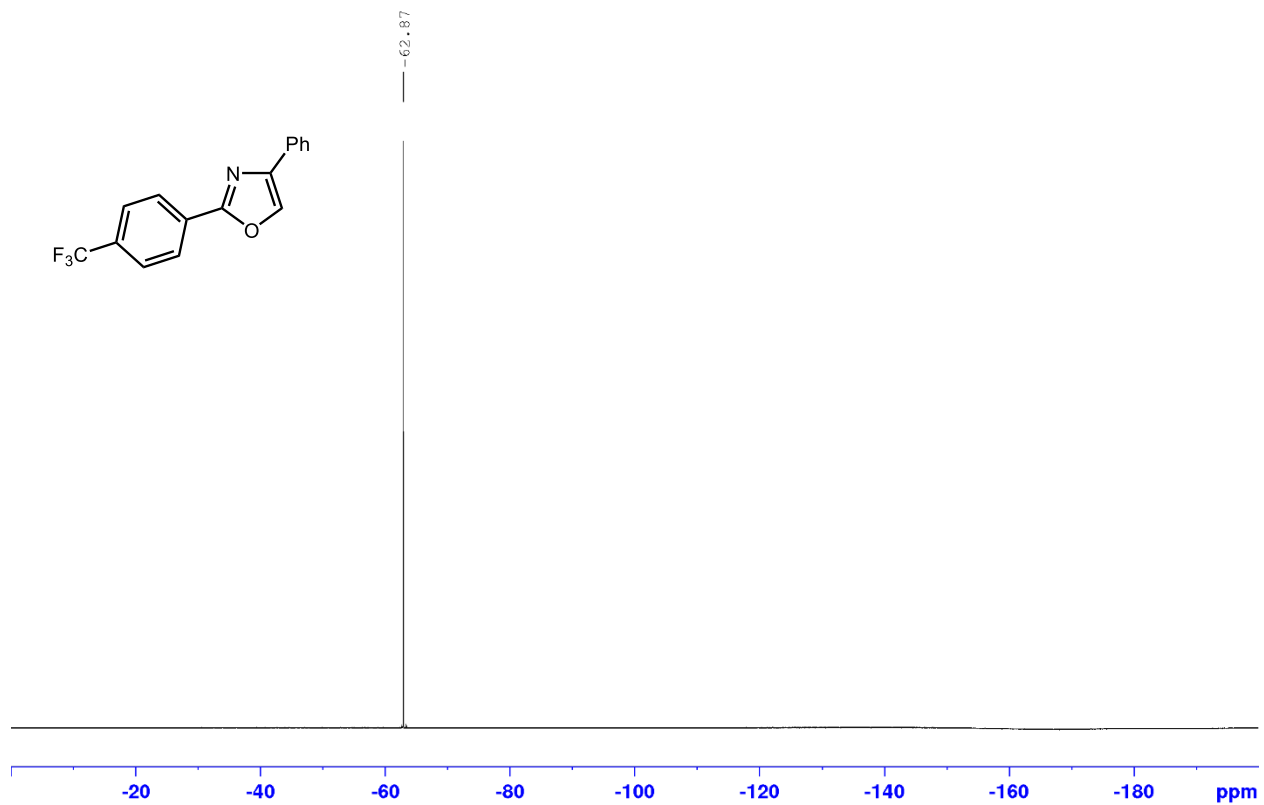

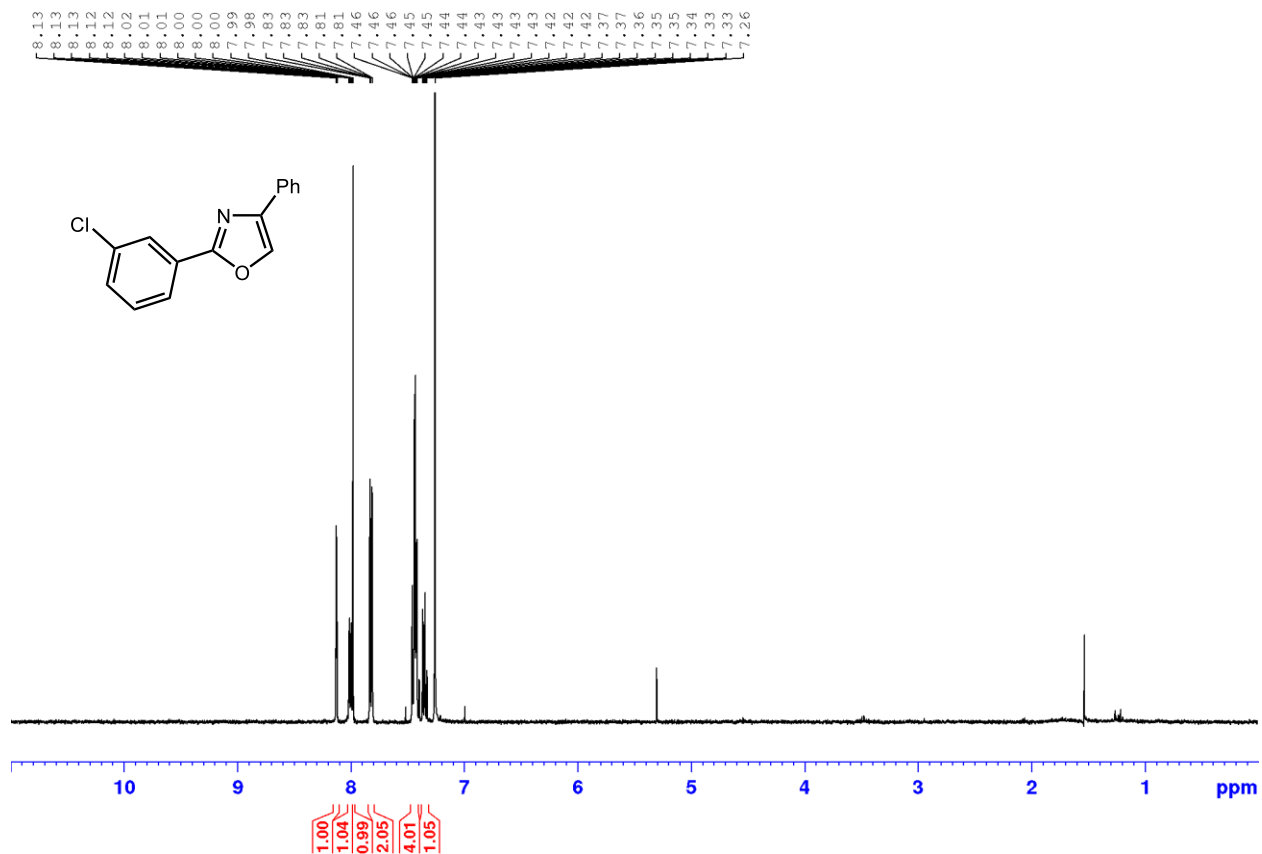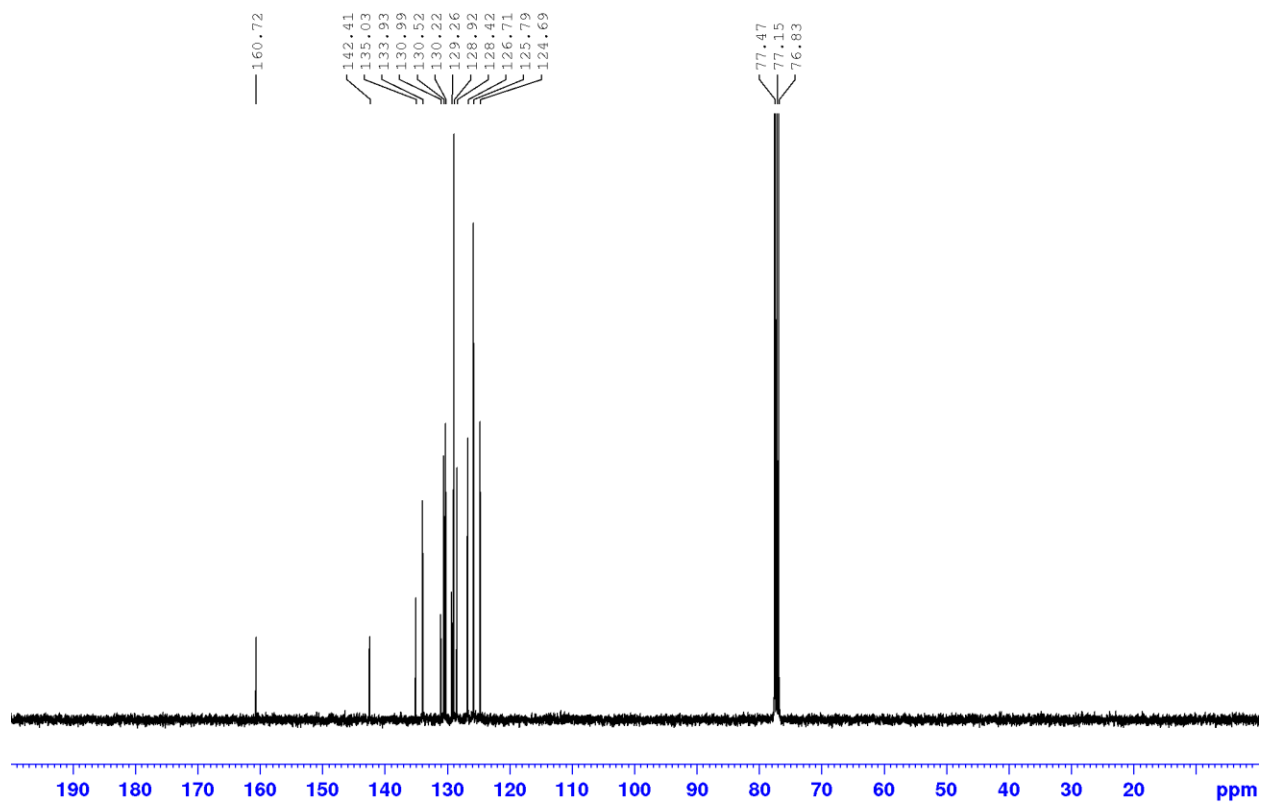



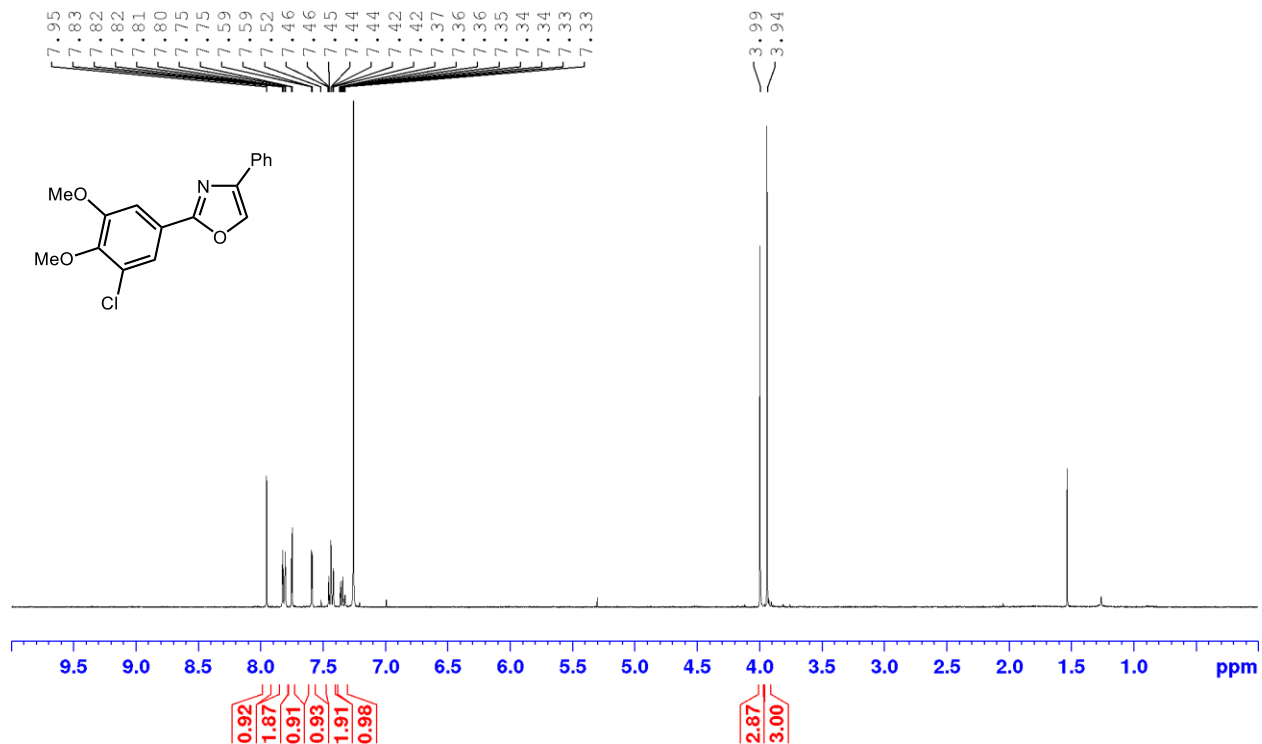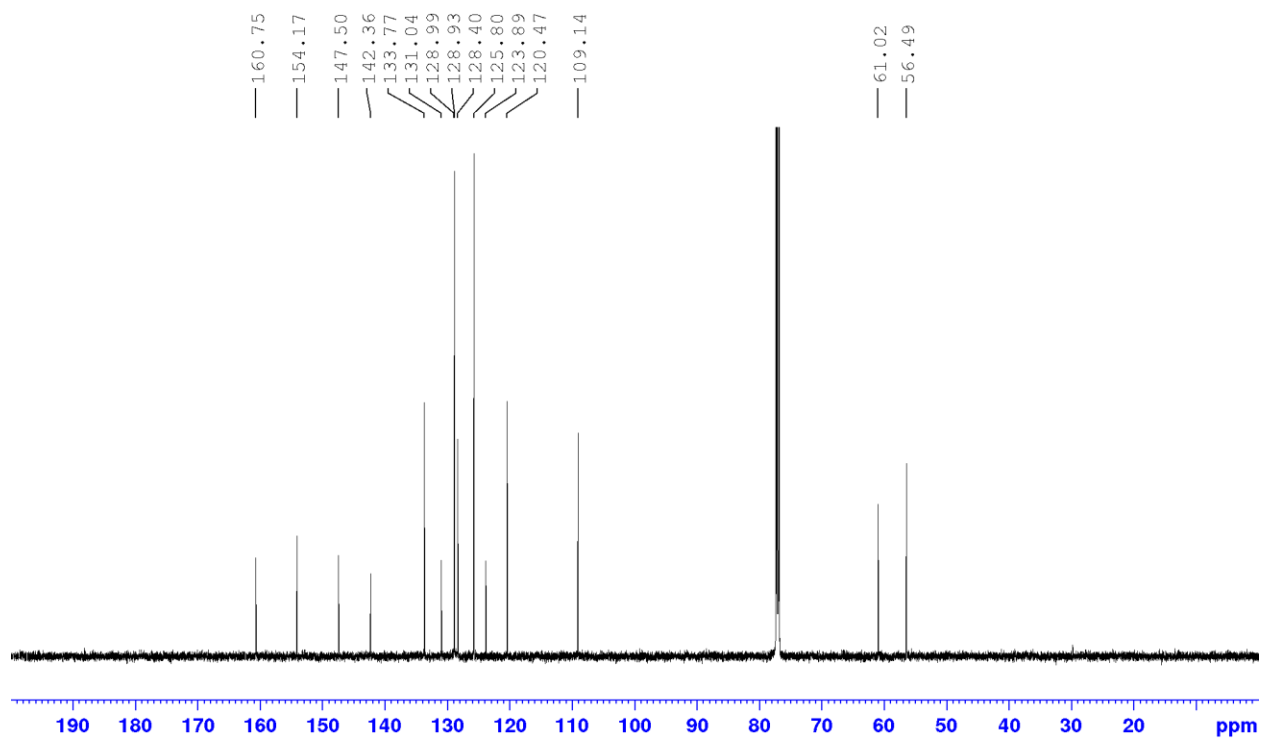

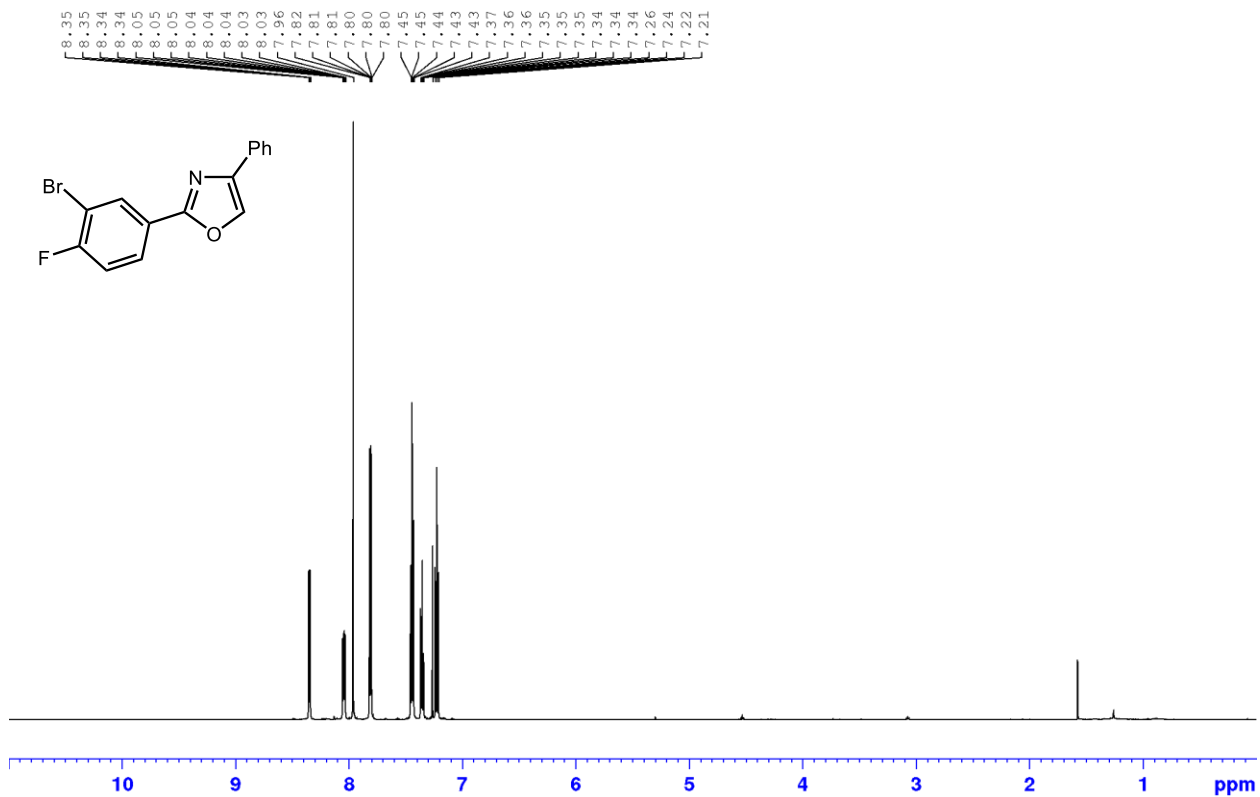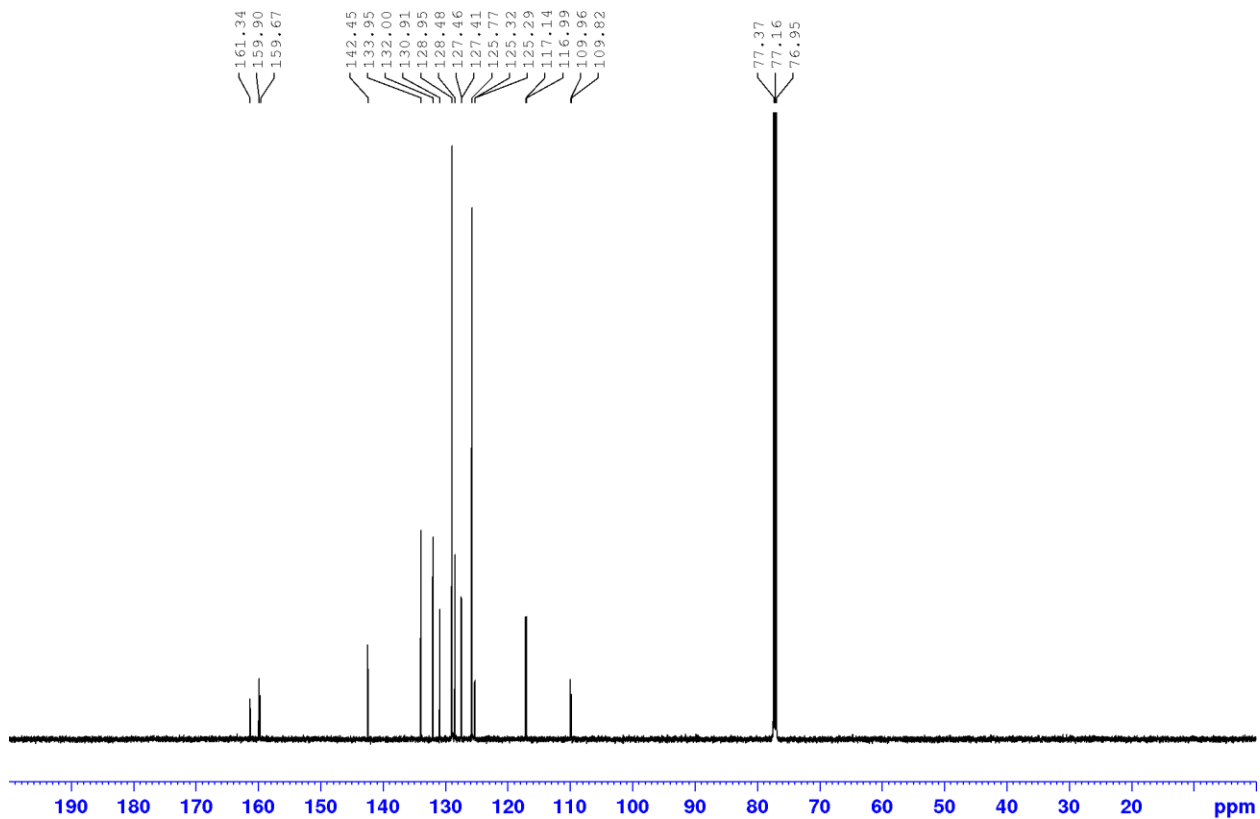

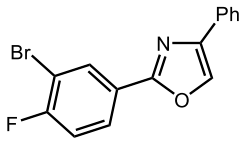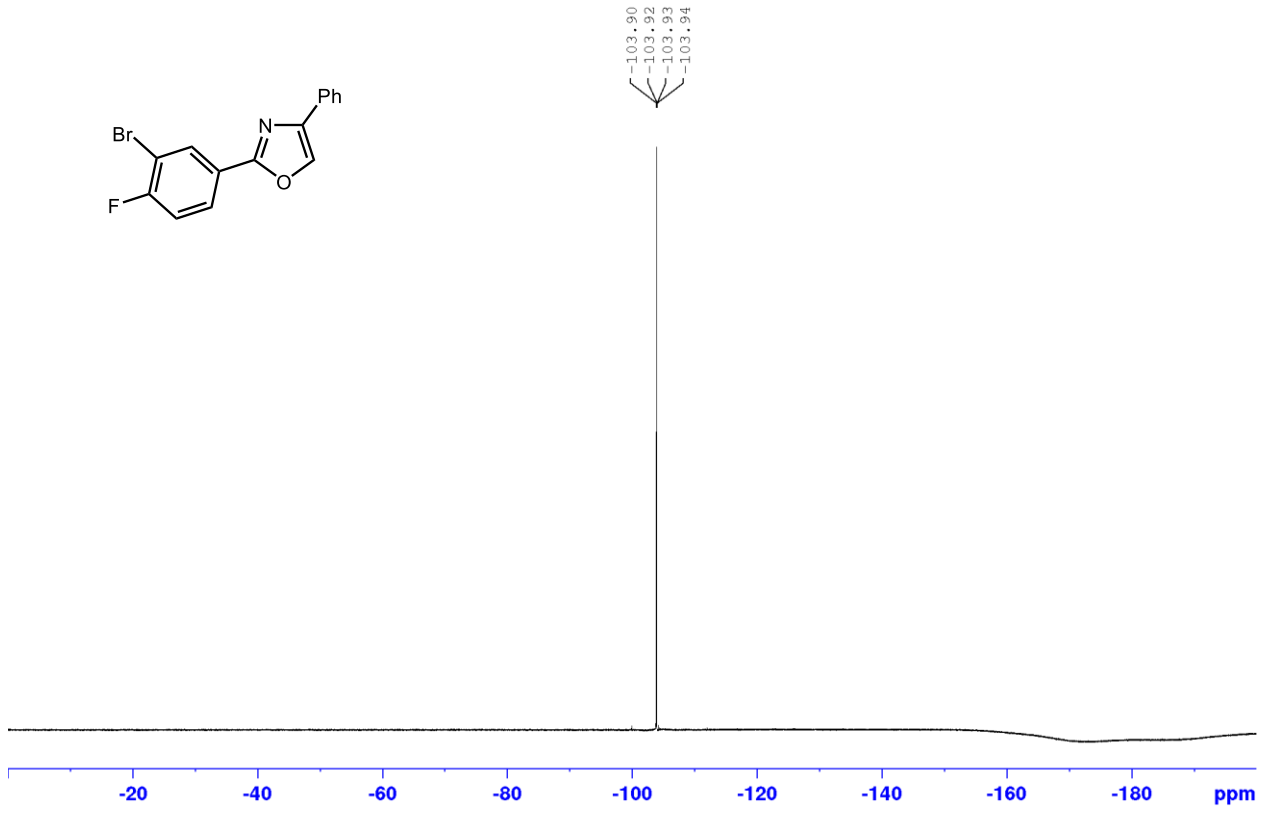

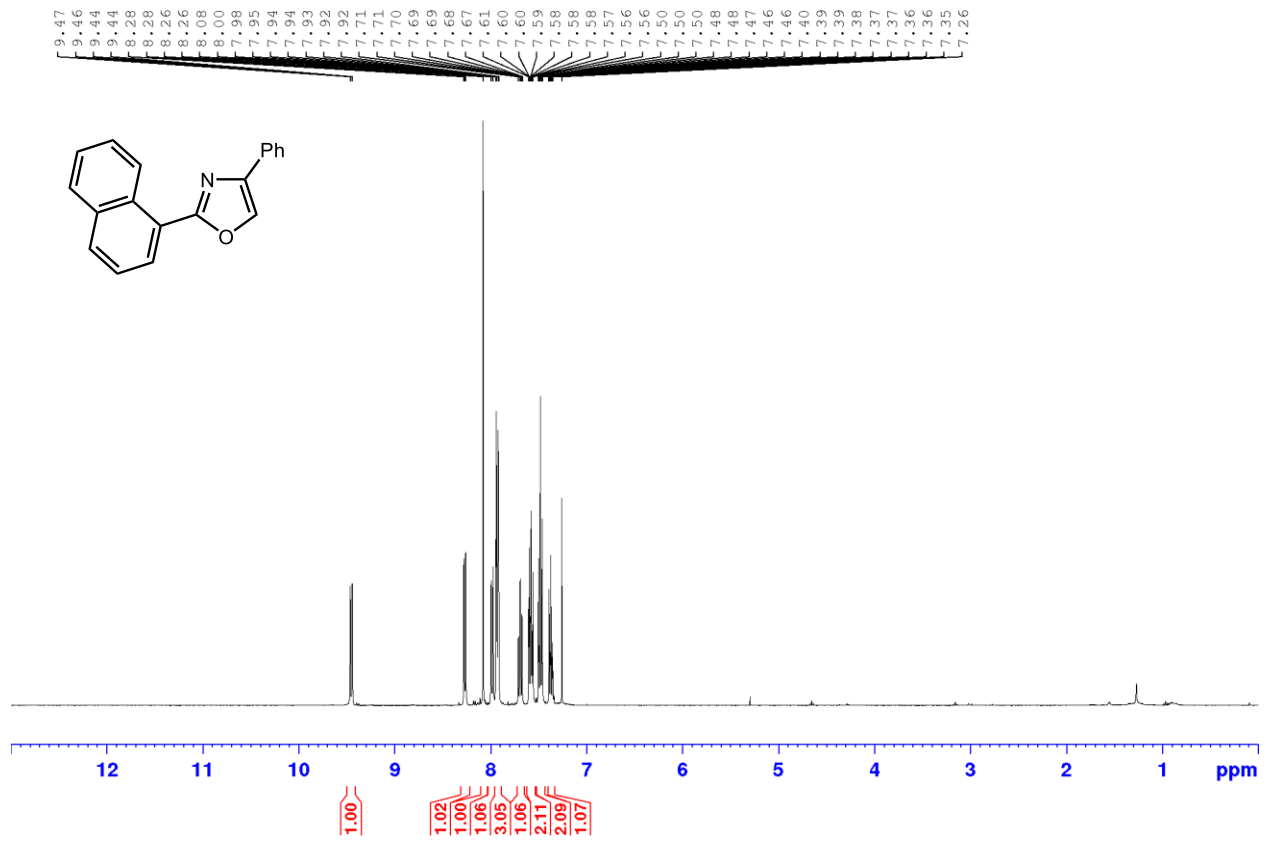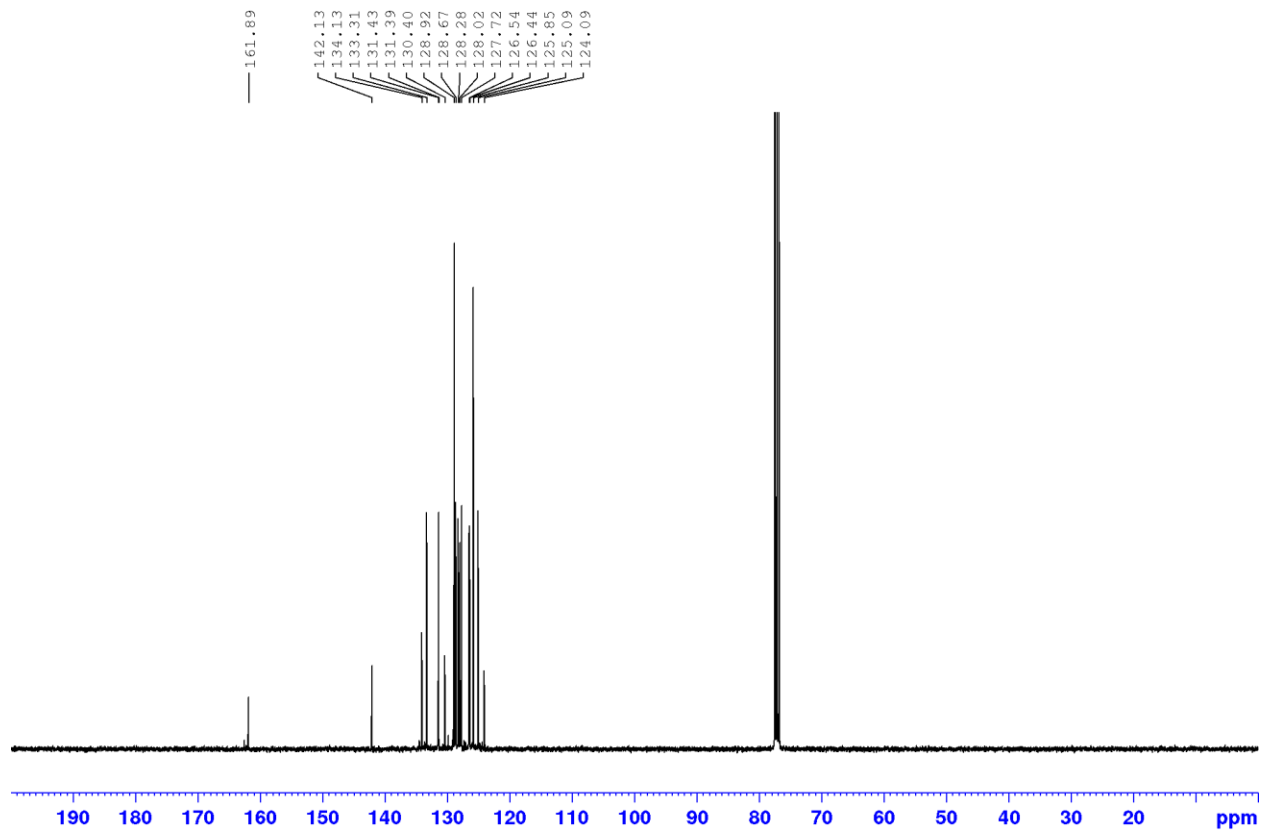

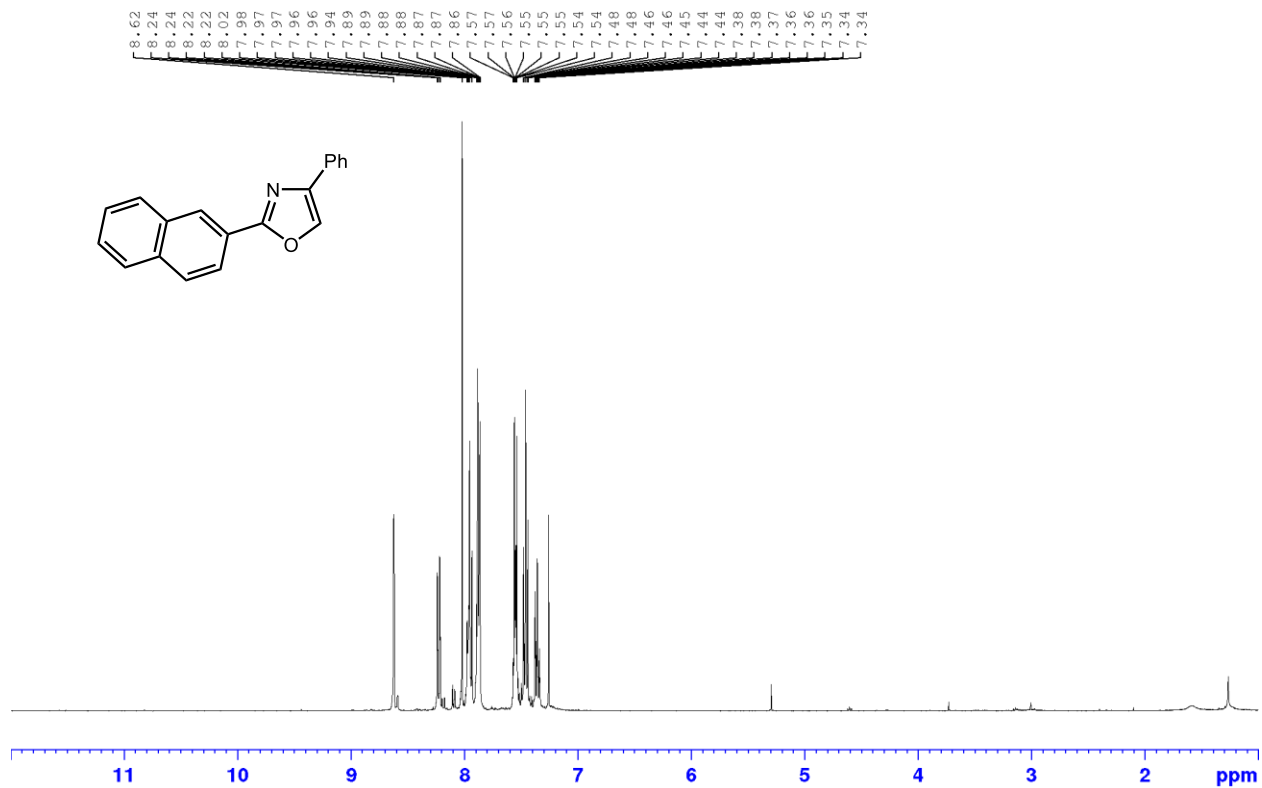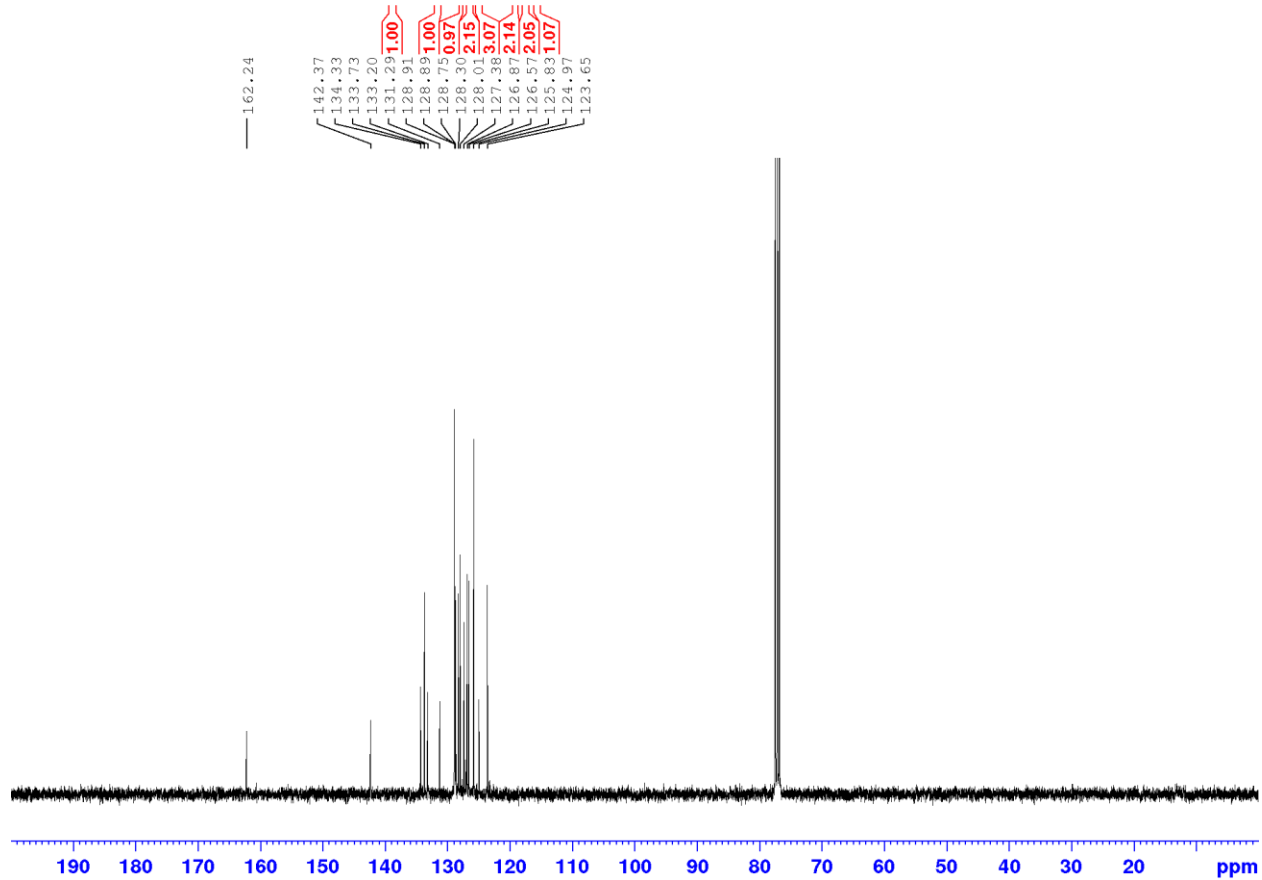

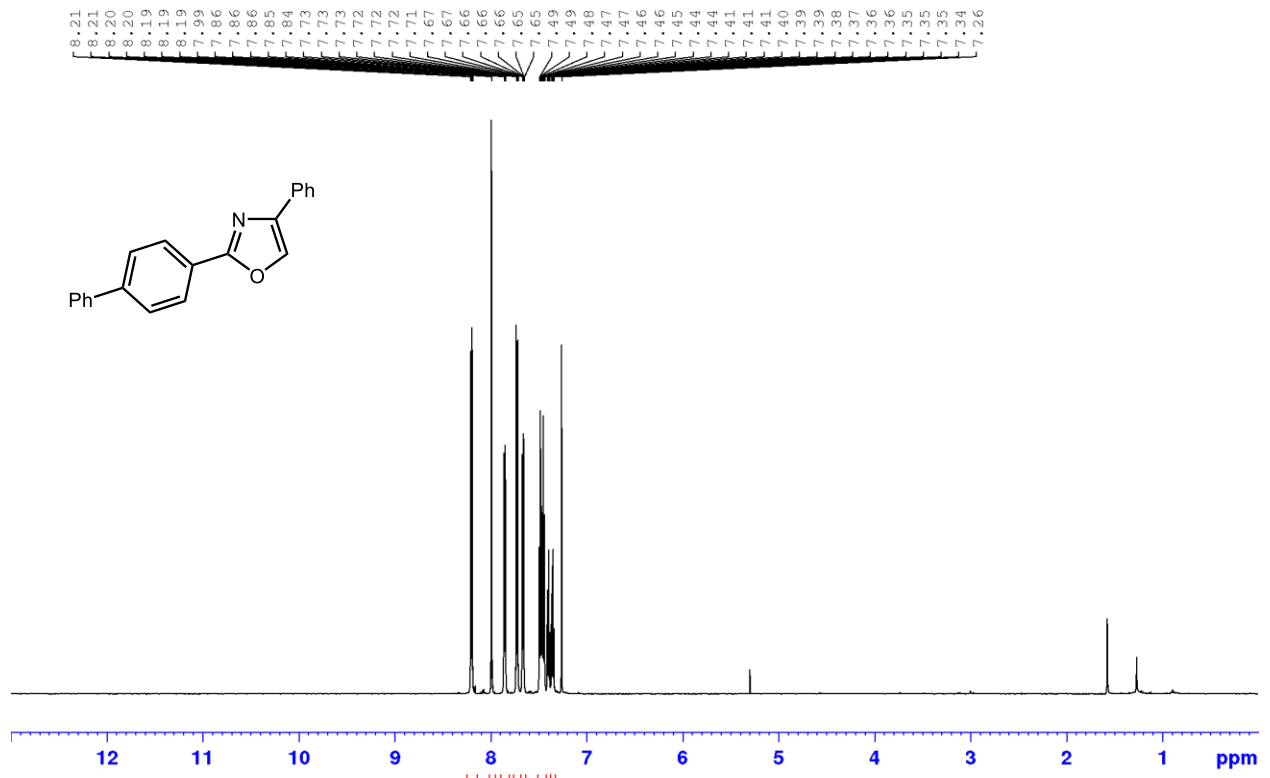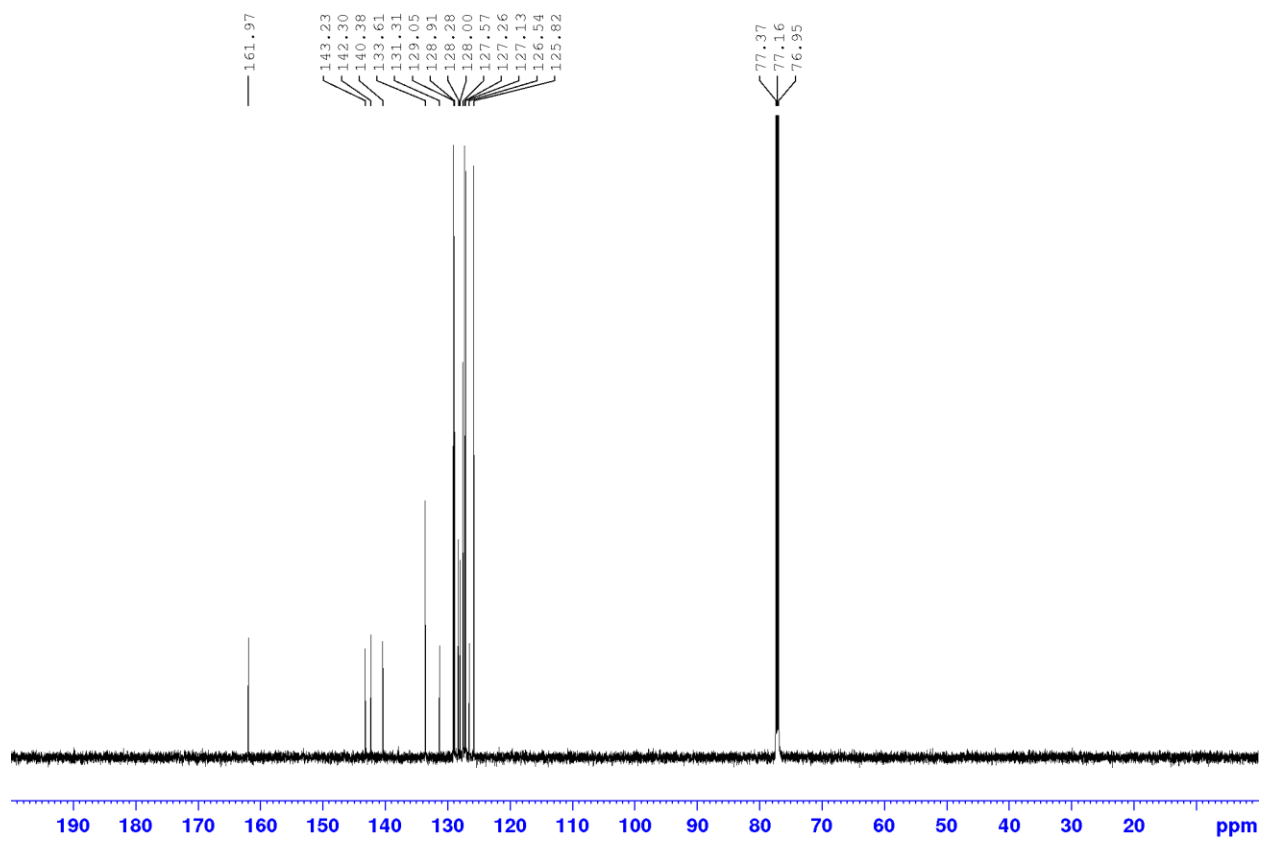

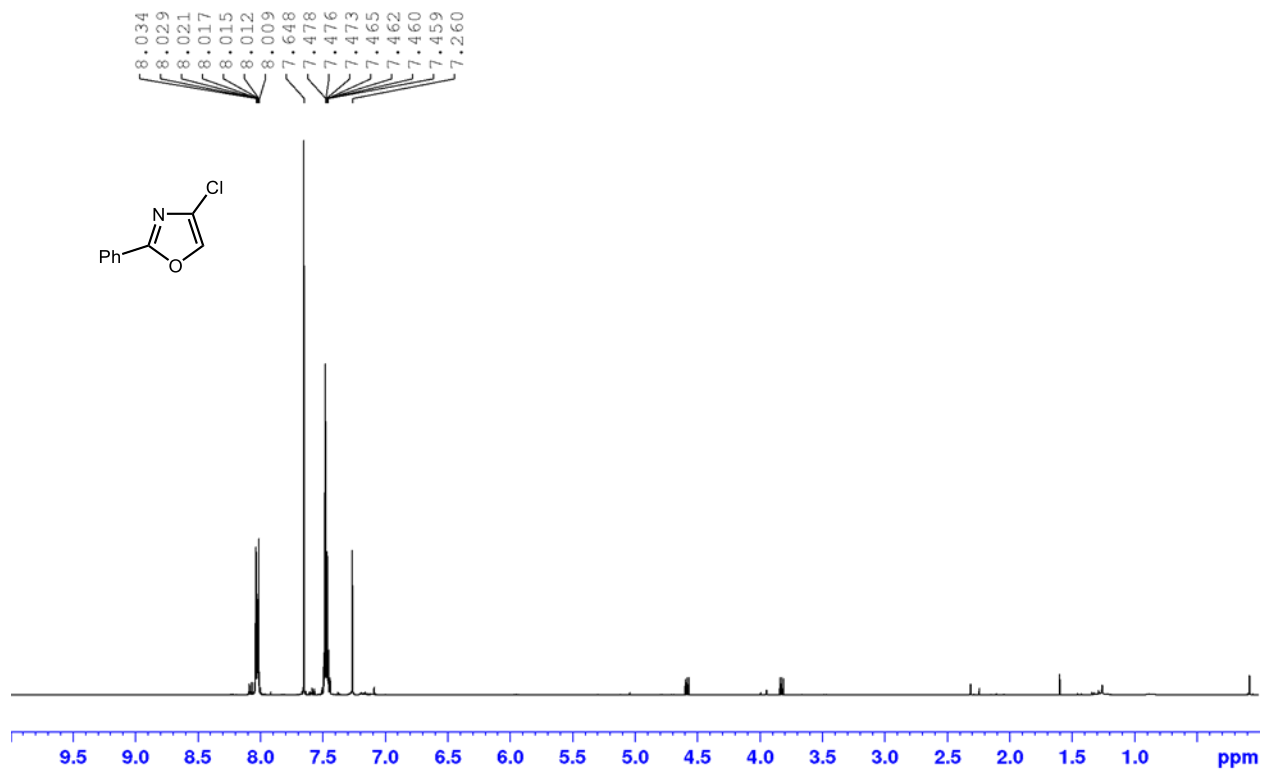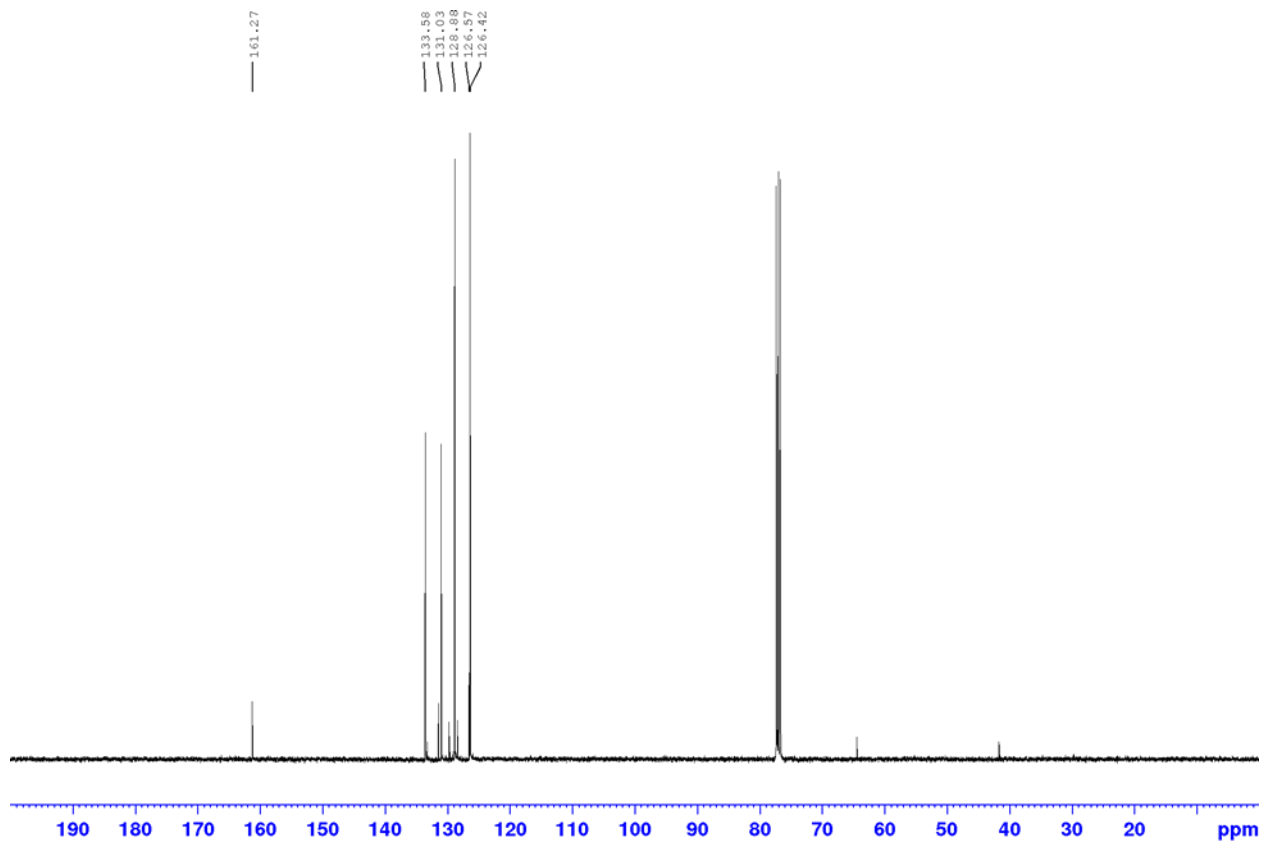

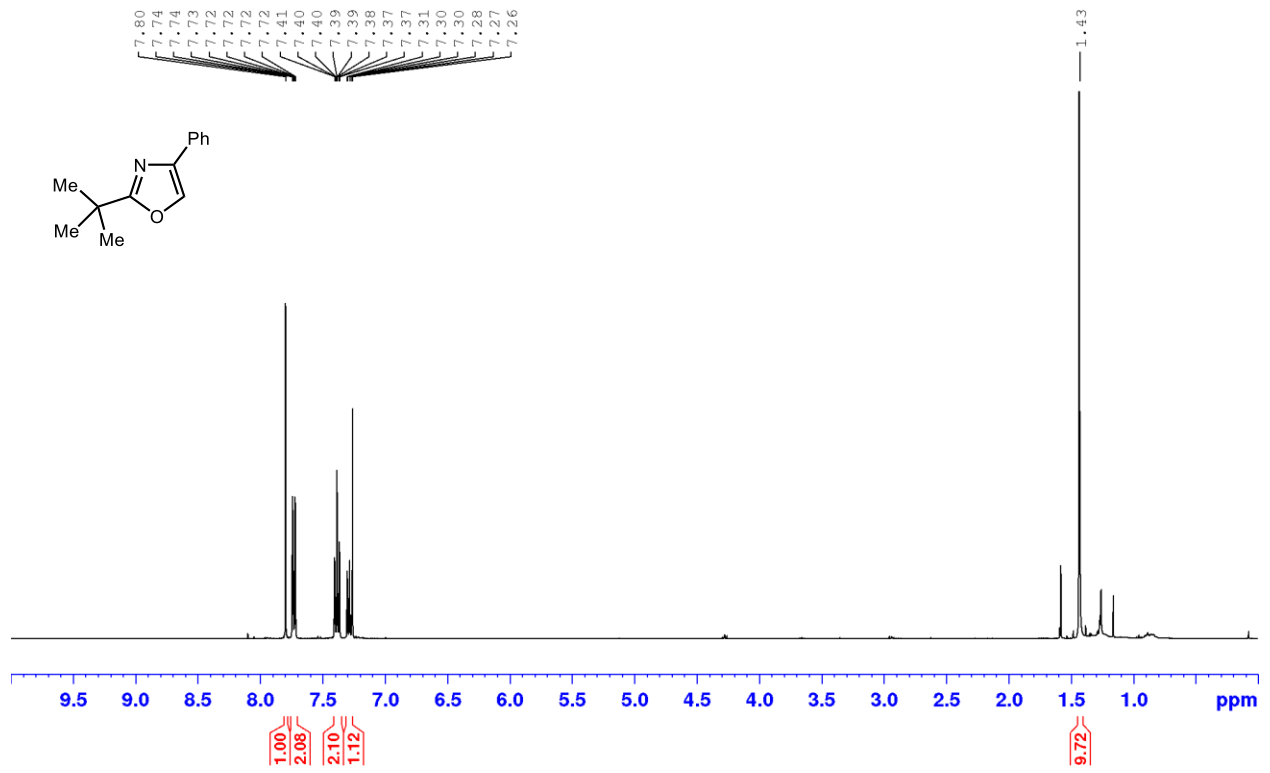



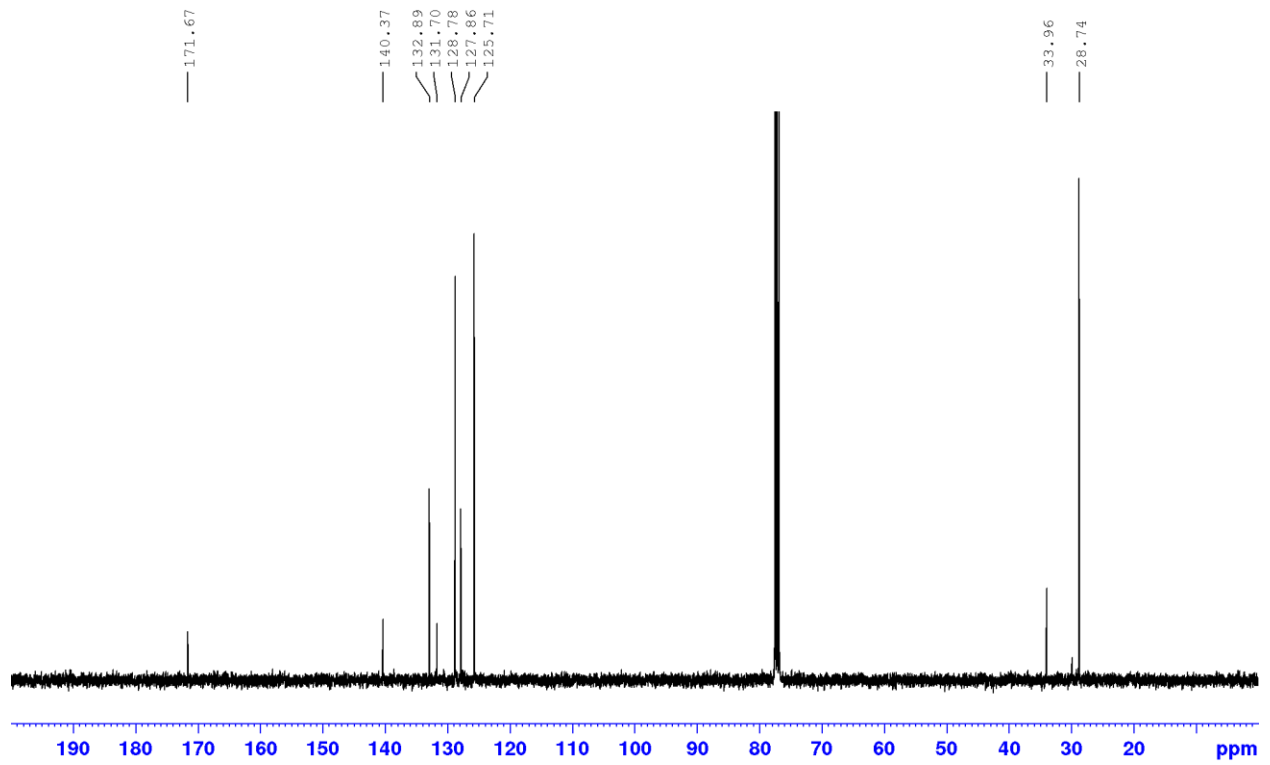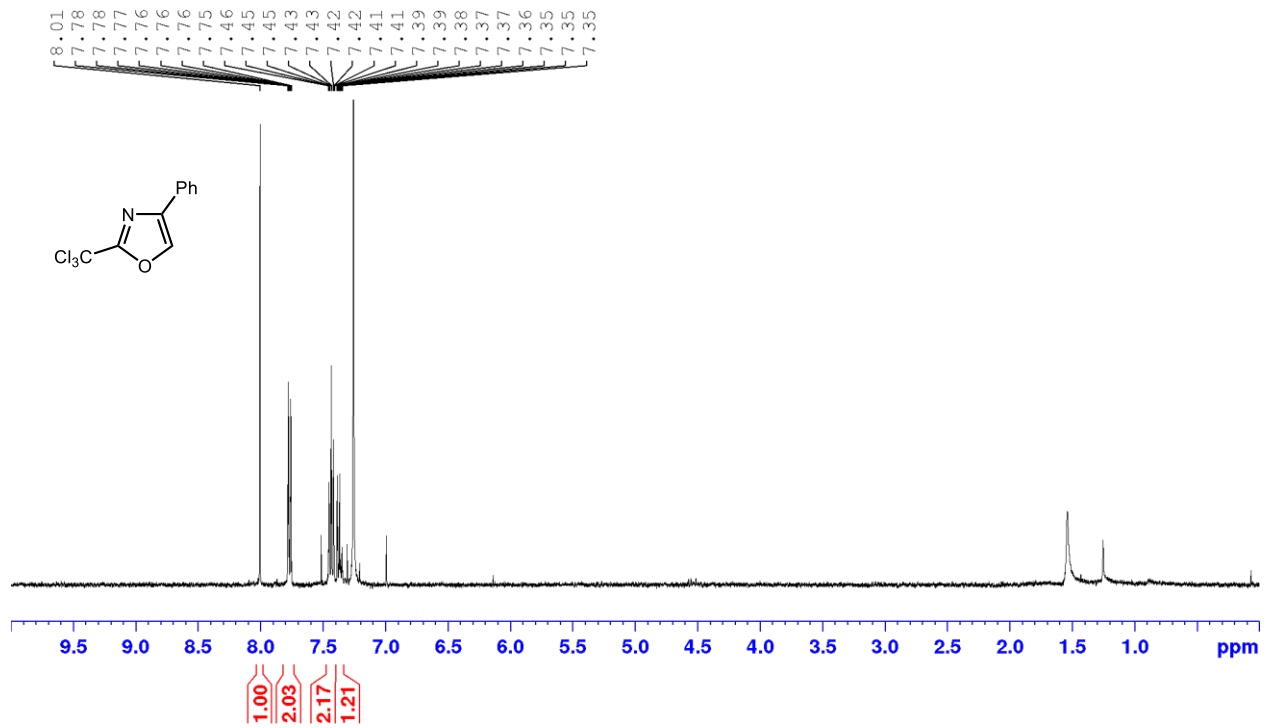

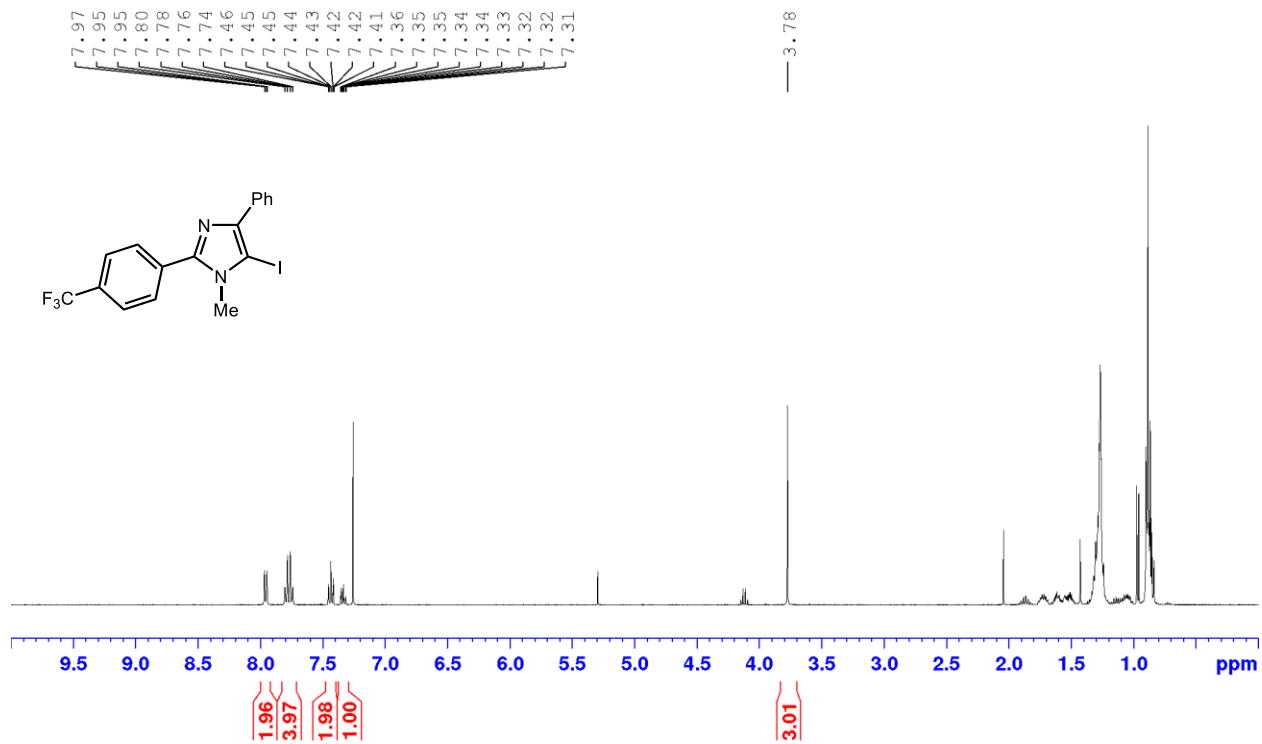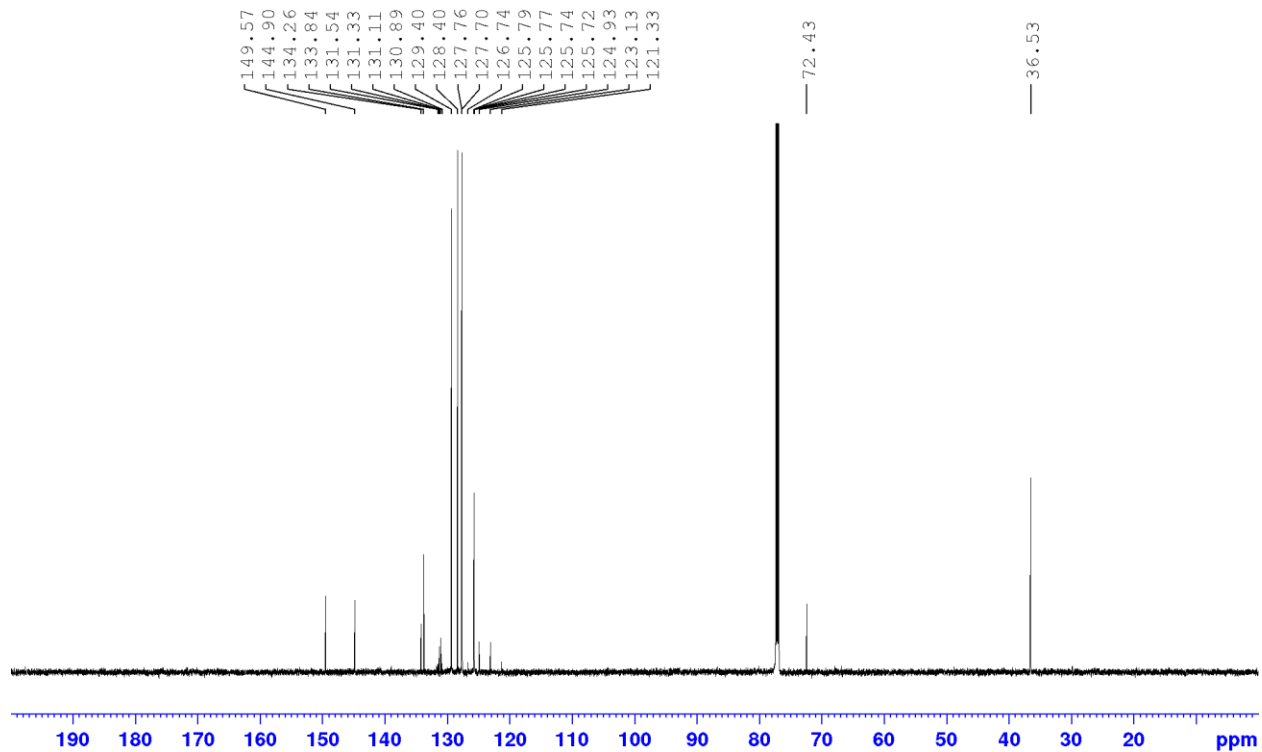

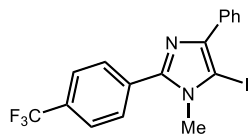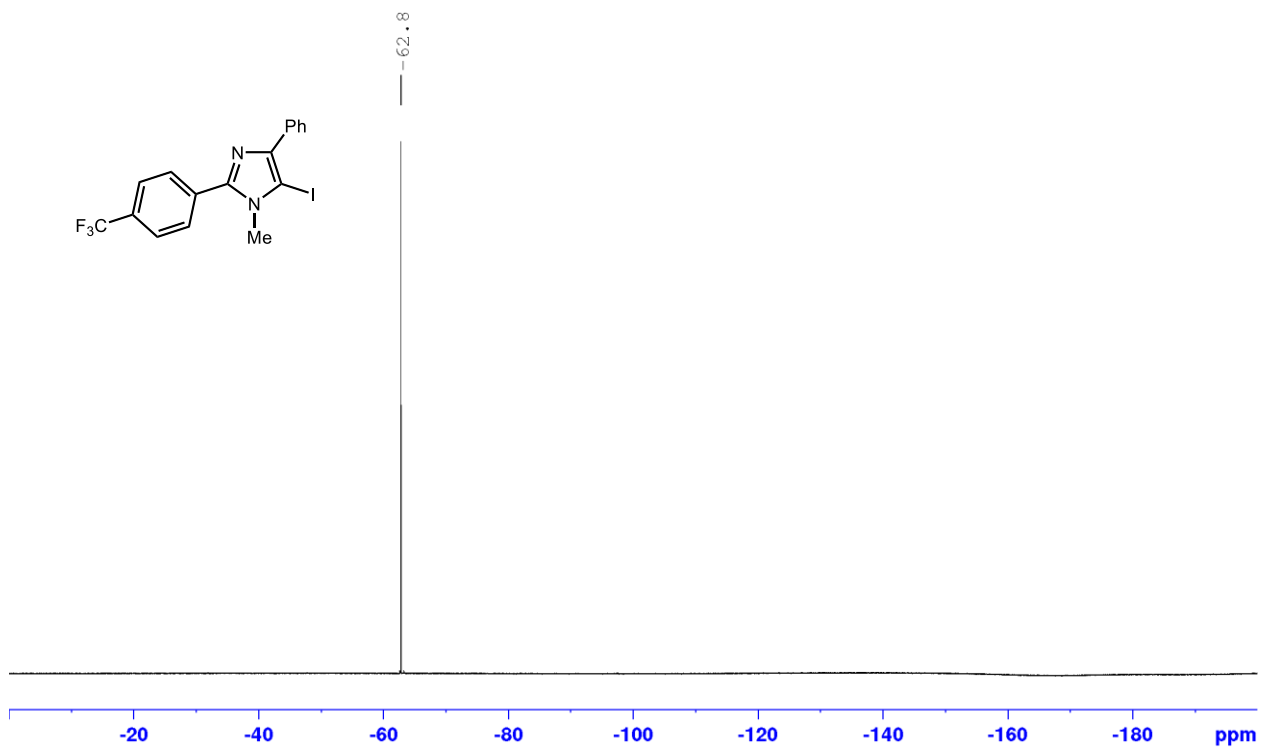

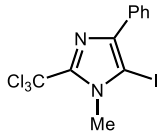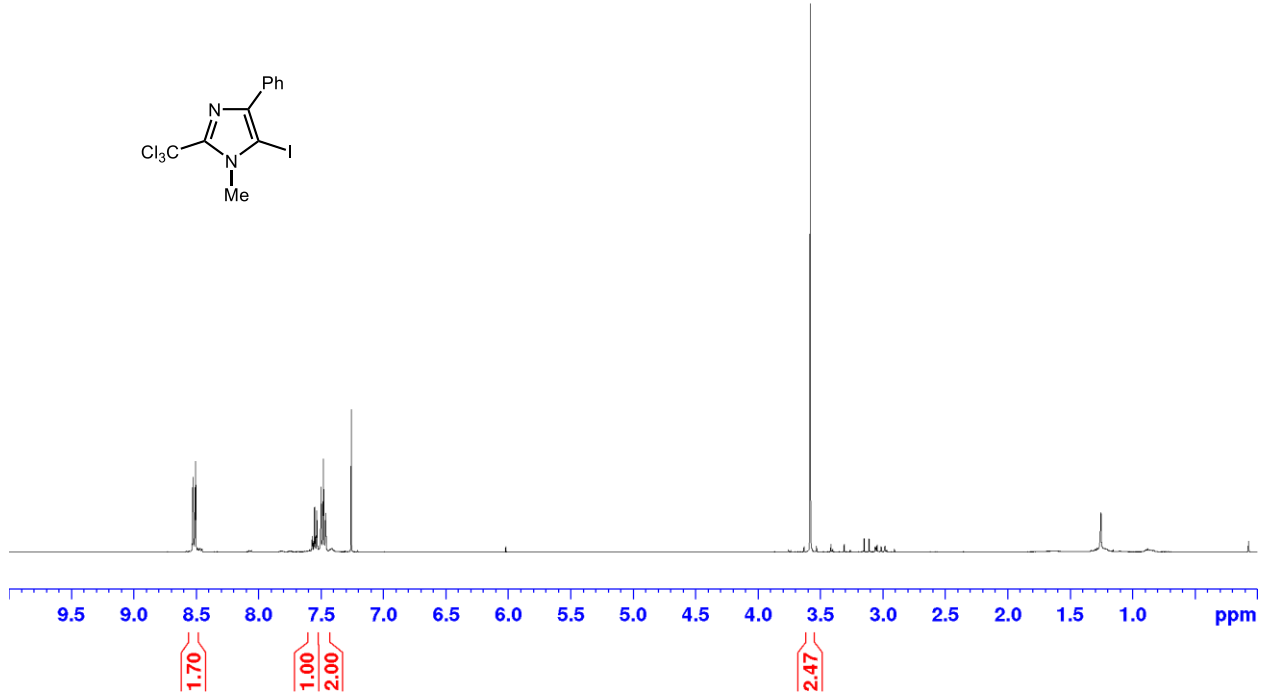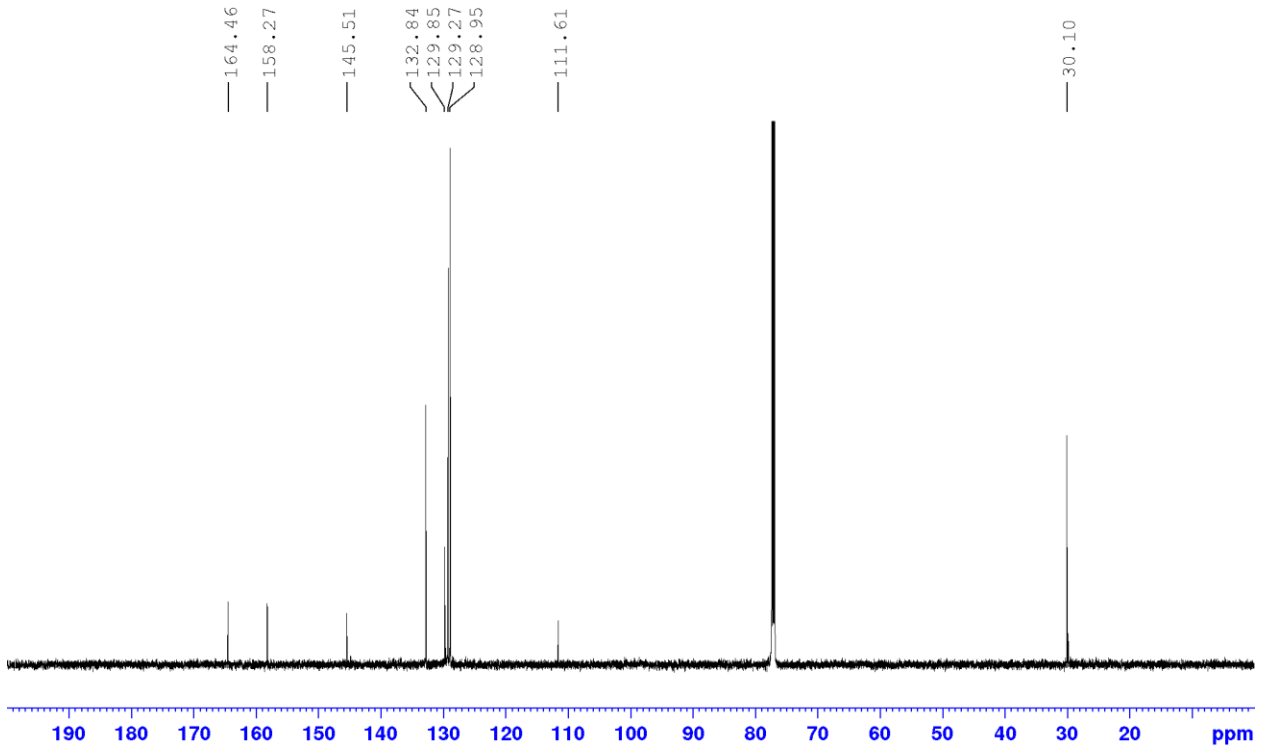

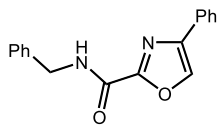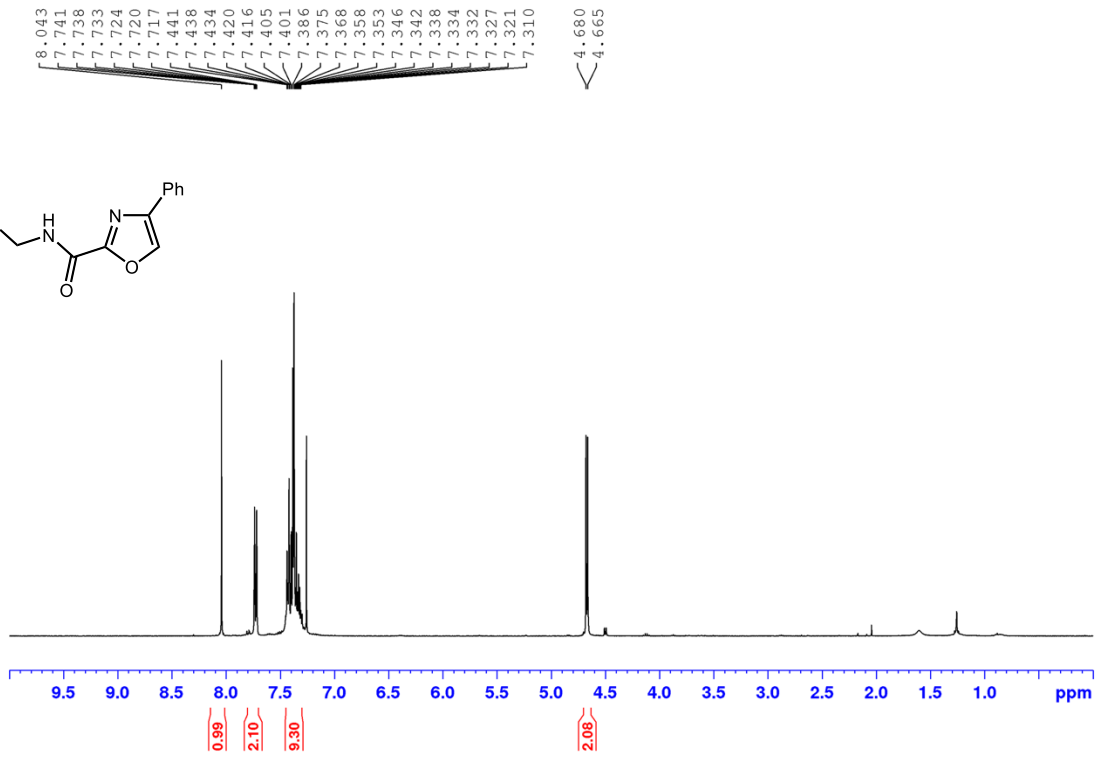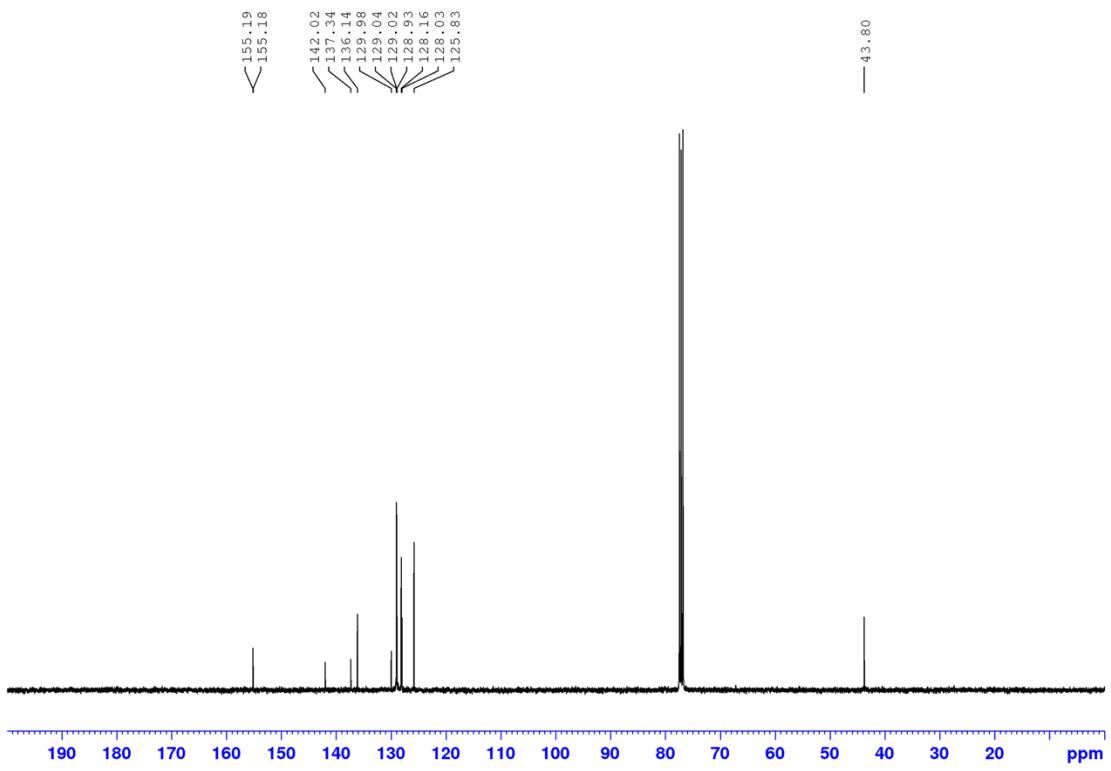

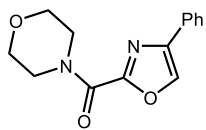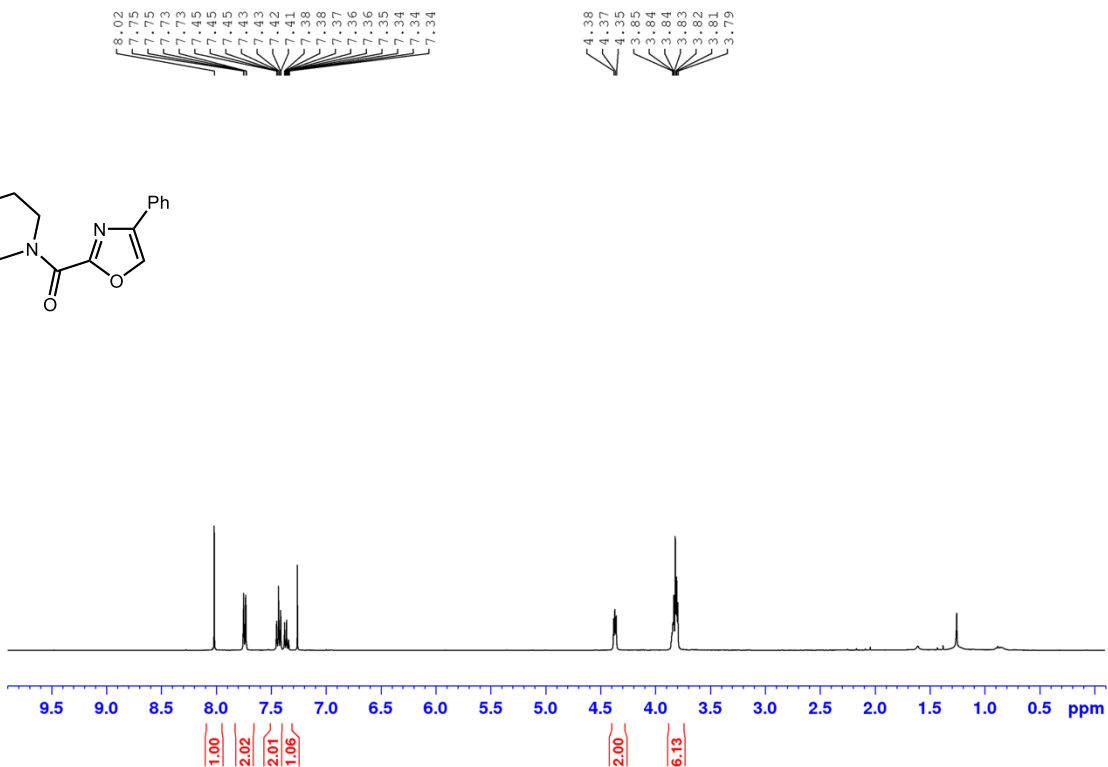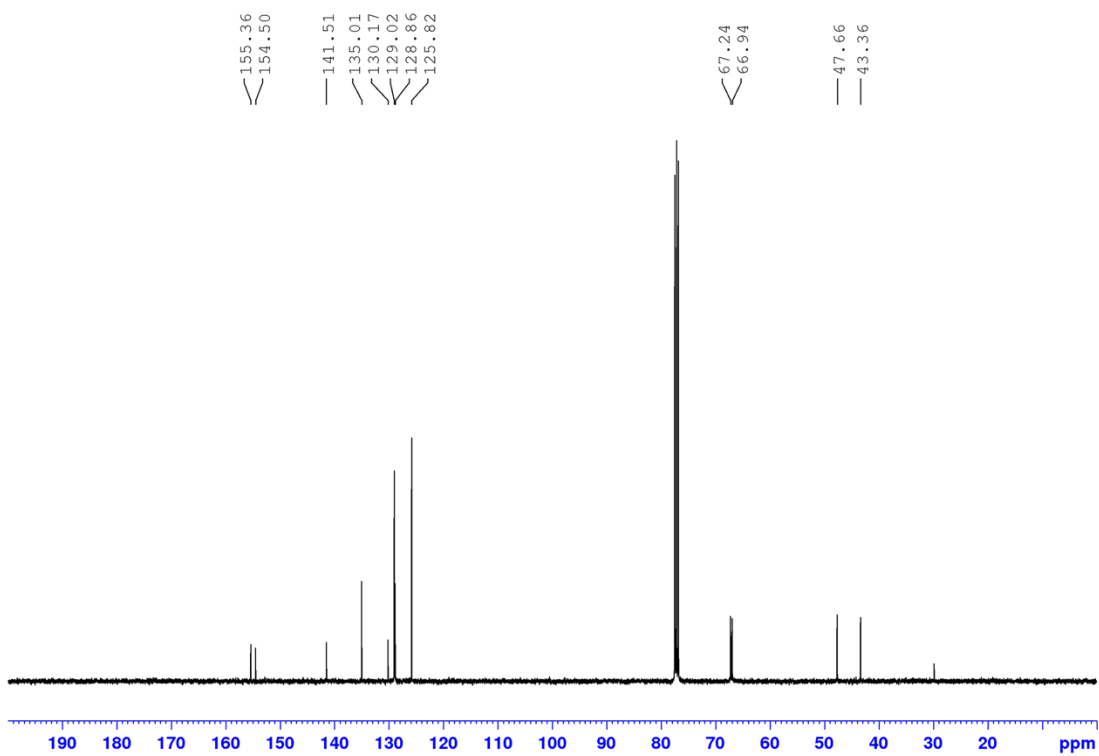

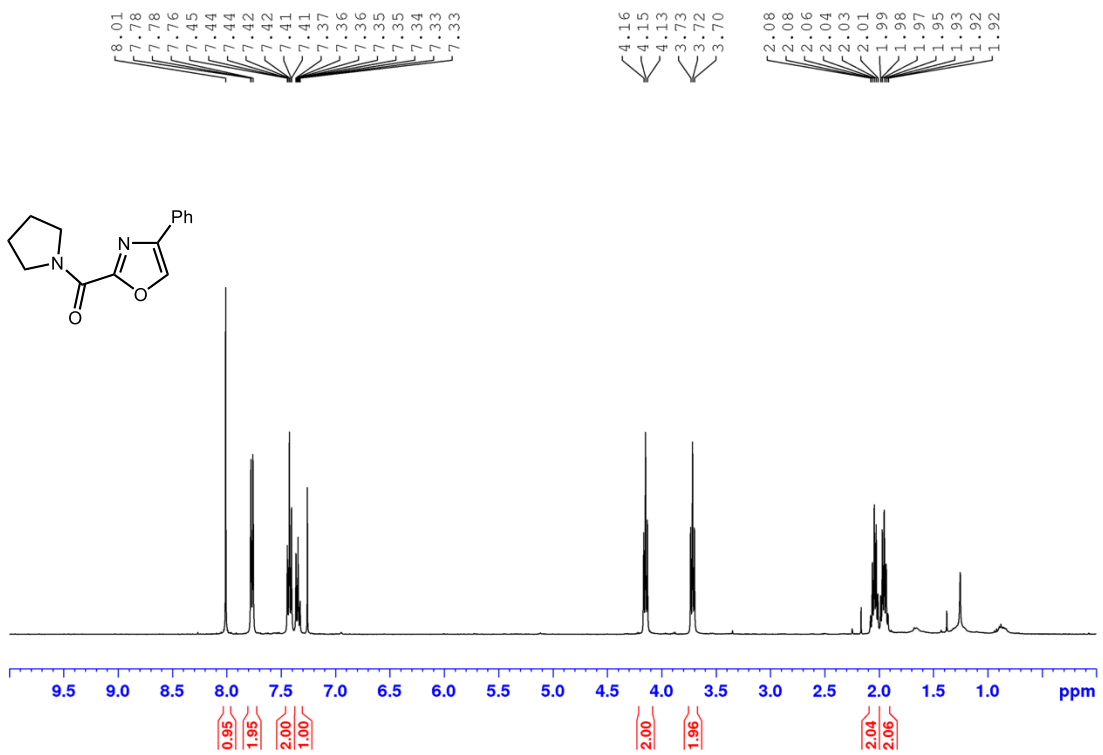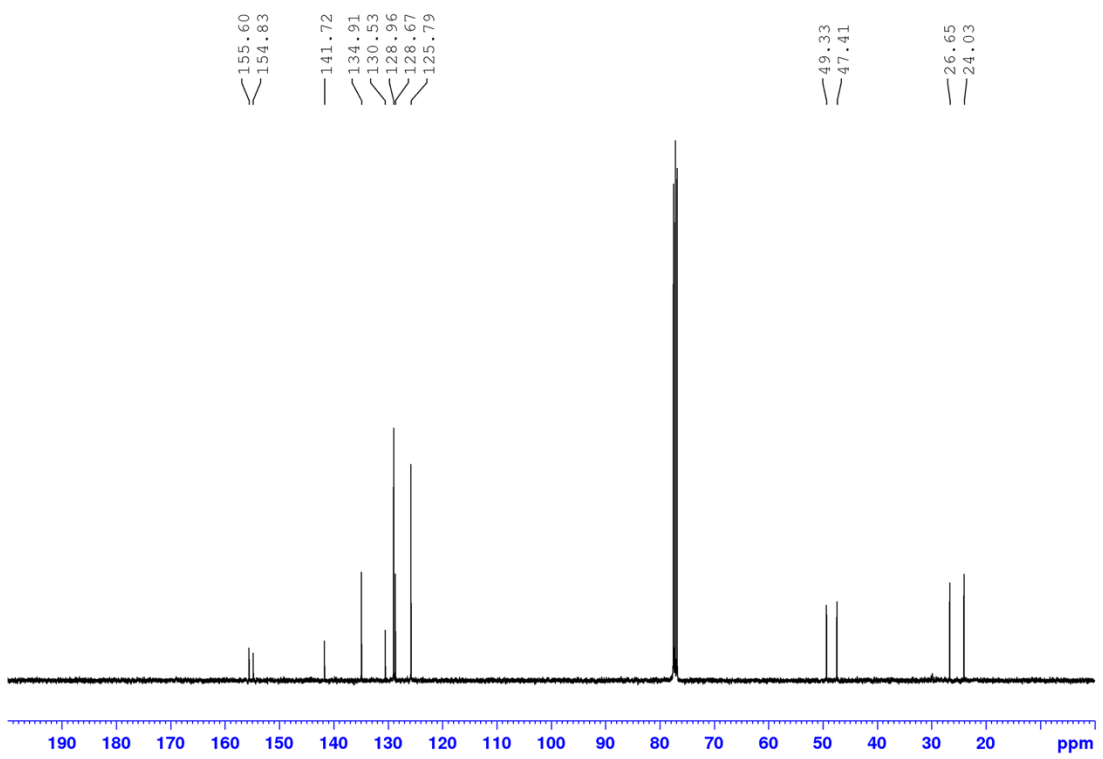

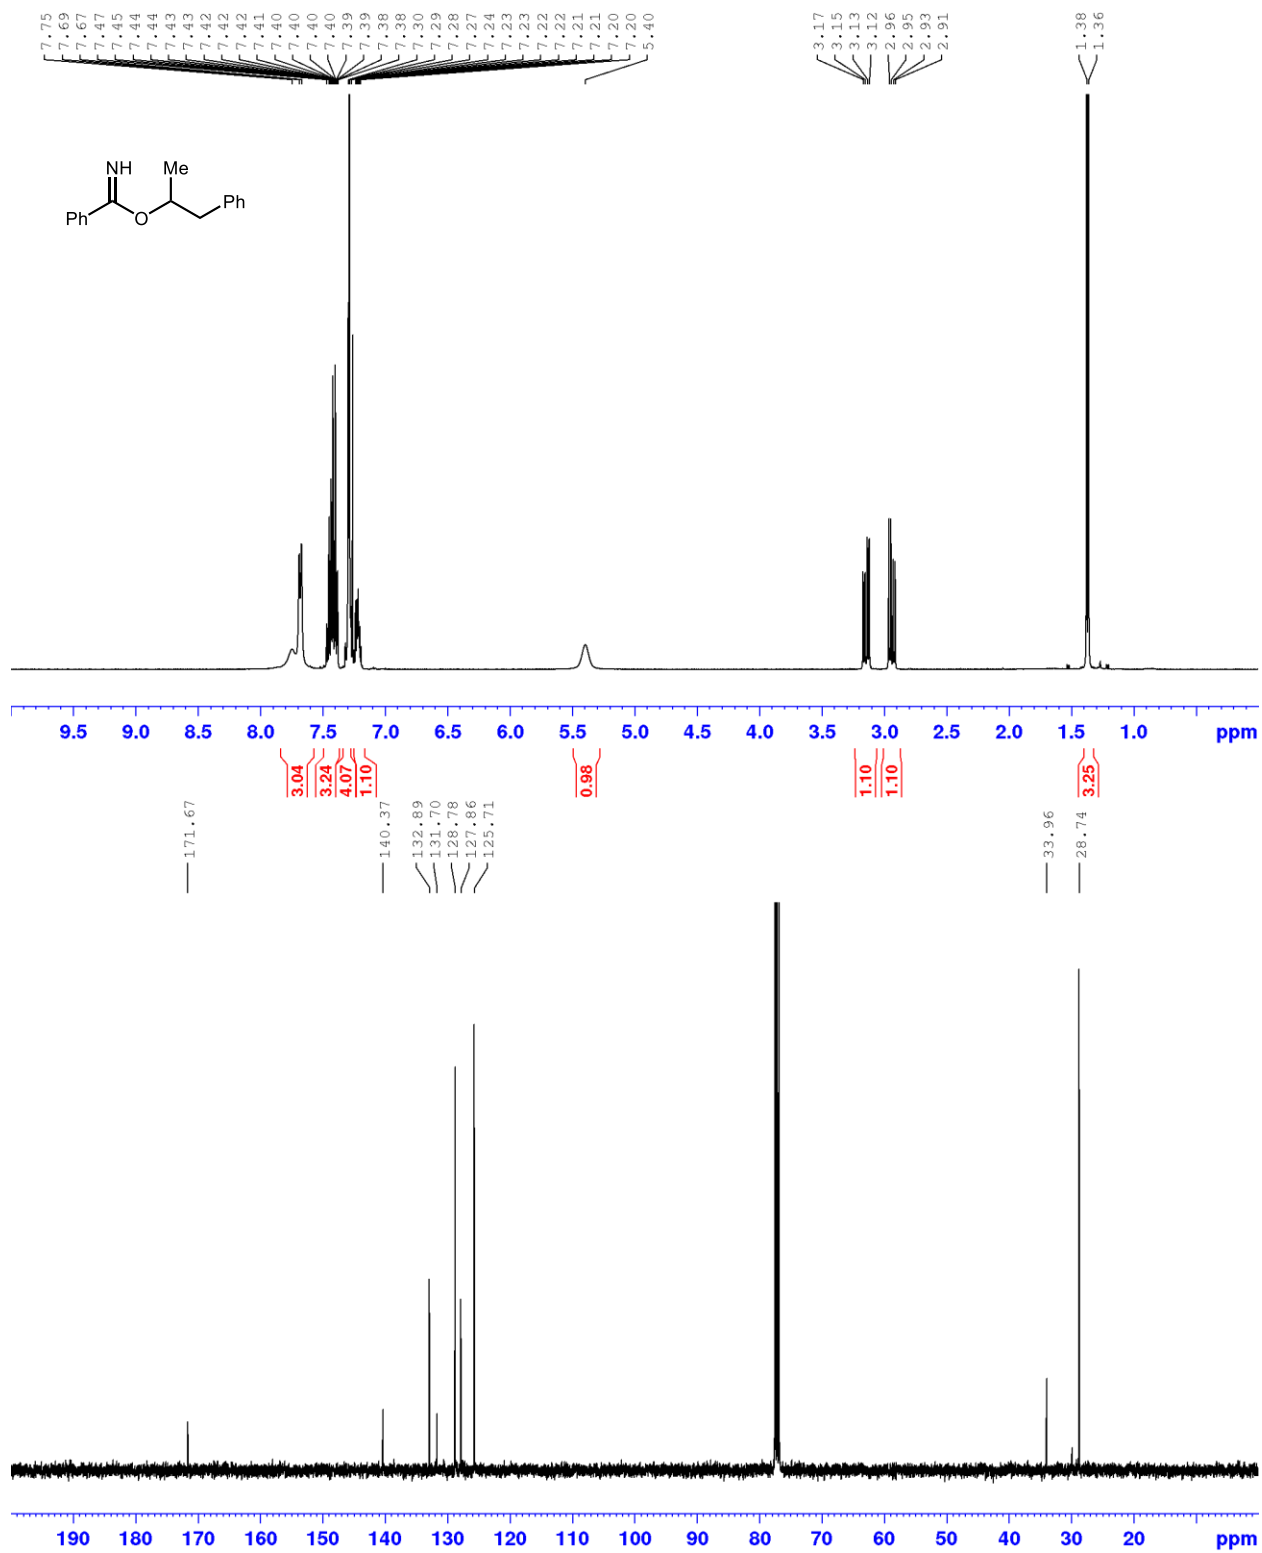



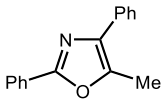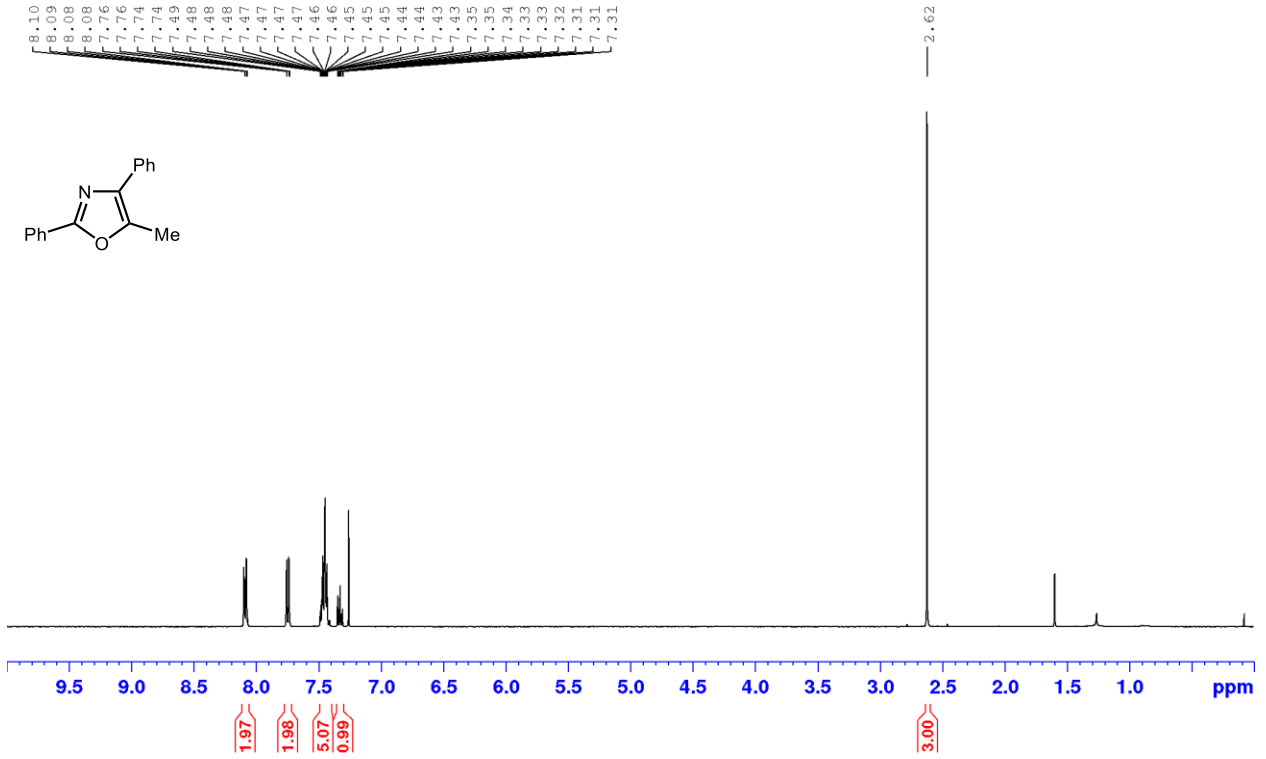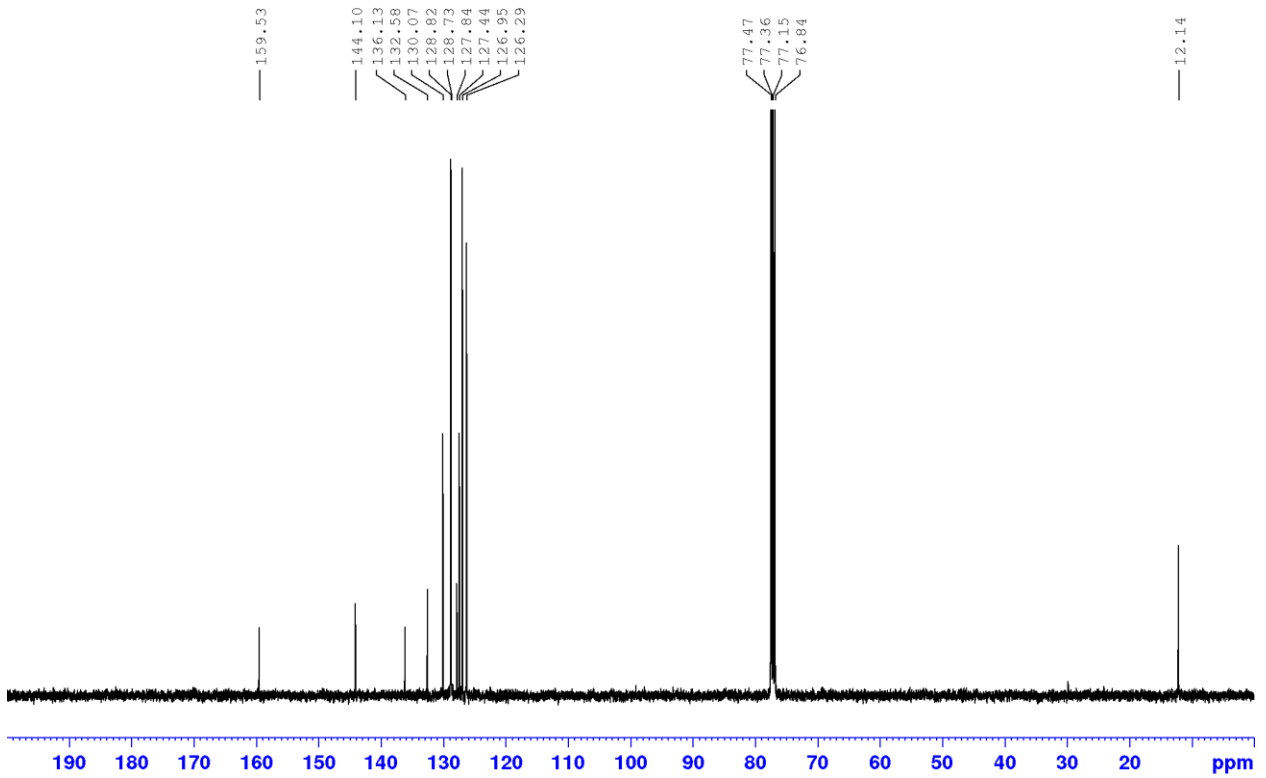

Supplement: c9sc06239d1.pdf [file c9sc06239d1.pdf]
